# Supplementary material
Source: publisher site journal article supplement (https://www.spandidos-publications.com/7912/downloadSupplementary)
Supplement: Supplementary file 1 [file downloadSupplementary]

## Sheet: Raw data cortex
PG.ProteinGroups	PG.Genes	PG.Organisms	PG.ProteinDescriptions	PG.CellularComponent	PG.BiologicalProcess	PG.MolecularFunction	PG.Qvalue	AGE CORTEX-10 Intensity	AGE CORTEX-11 Intensity	AGE CORTEX-12 Intensity	AGE CORTEX-19 Intensity	AGE CORTEX-13 Intensity	AGE CORTEX Intensity mean	CONTROL CORTEX-14 Intensity	CONTROL CORTEX-15 Intensity	CONTROL CORTEX-16 Intensity	CONTROL CORTEX-17 Intensity	CONTROL CORTEX-18 Intensity	CONTROL CORTEX Intensity mean	expression ratio	unadj pvalue	LOG2FC	logpvalue
A0A140LI88	Ankrd31	Mus musculus	Ankyrin repeat domain-containing protein 31	chromatin,nucleus	meiotic DNA double-strand break formation involved in reciprocal meiotic recombination,positive regulation of meiotic DNA double-strand break formation,synapsis		0.00016257	21.8535	NaN	NaN	30.339	29.1555	27.116	20.545	NaN	15.8148	NaN	NaN	18.1799	1.49154	0.10312	0.576803	0.986657
A2A432	Cul4b	Mus musculus	Cullin-4B	Cul4B-RING E3 ubiquitin ligase complex,Cul4-RING E3 ubiquitin ligase complex,cullin-RING ubiquitin ligase complex,cytosol,nucleoplasm,nucleus,SCF ubiquitin ligase complex	cell cycle,cellular response to DNA damage stimulus,histone H2A monoubiquitination,neuron projection development,positive regulation of G1/S transition of mitotic cell cycle,positive regulation of protein catabolic process,proteasomal protein catabolic process,proteasome-mediated ubiquitin-dependent protein catabolic process,protein ubiquitination,ribosome biogenesis,SCF-dependent proteasomal ubi…	damaged DNA binding,ubiquitin protein ligase binding,ubiquitin-protein transferase activity	2.34184e-17	519.4	588.189	524.435	502.426	520.358	530.962	437.003	400.32	432.233	391.257	529.836	438.13	1.21188	0.0119341	0.277249	1.92321
A2A591;Q9D638	Krtap3-1;Krtap3-2	Mus musculus	Keratin-associated protein 3-1;Keratin-associated protein 3-2	keratin filament;keratin filament	;	structural molecule activity;structural molecule activity	1.54684e-05	1103.05	NaN	NaN	NaN	93.1249	598.089	NaN	218.379	NaN	NaN	NaN	218.379	2.73877	#DIV/0!	1.45353	#DIV/0!
A2A5R2	Arfgef2	Mus musculus	Brefeldin A-inhibited guanine nucleotide-exchange protein 2	asymmetric synapse,axonemal microtubule,cytoplasm,cytoplasmic vesicle,cytosol,dendritic spine,Golgi membrane,membrane,microtubule organizing center,perinuclear region of cytoplasm,recycling endosome,symmetric synapse,trans-Golgi network	endomembrane system organization,endosome organization,exocytosis,Golgi to plasma membrane transport,intracellular signal transduction,positive regulation of tumor necrosis factor production,protein transport,receptor recycling,regulation of ARF protein signal transduction	ARF guanyl-nucleotide exchange factor activity,GABA receptor binding,guanyl-nucleotide exchange factor activity,myosin binding,protein kinase A regulatory subunit binding	1.76922e-11	261.524	300.197	255.401	200.367	249.684	253.435	181.254	193.526	314.771	266.214	232.578	237.668	1.06634	0.603418	0.0926639	0.219382
A2A690	Tanc2	Mus musculus	Protein TANC2	axon,dendritic spine,glutamatergic synapse,postsynaptic density, intracellular component	dense core granule cytoskeletal transport,in utero embryonic development,regulation of dendritic spine development,regulation of dendritic spine morphogenesis		1.01704e-15	332.259	445.062	366.255	334.553	326.603	360.946	296.619	317.803	407.707	444.719	426.025	378.574	0.953436	0.648322	-0.0687916	0.188209
A2A699	Fam171a2	Mus musculus	Protein FAM171A2	integral component of membrane			7.86346e-09	273.445	341.136	286.555	194.718	239.504	267.071	165.175	233.007	302.338	280.435	302.89	256.769	1.04012	0.780777	0.0567536	0.107473
A2A6T1	Cdr2l	Mus musculus	Cerebellar degeneration-related protein 2-like			identical protein binding	0.000279736	159.262	200.335	102.842	161.218	NaN	155.915	123.275	99.5364	NaN	127.404	NaN	116.738	1.33559	0.175349	0.417475	0.756097
A2A8L1	Chd5	Mus musculus	Chromodomain-helicase-DNA-binding protein 5	cytosol,heterochromatin,nuclear speck,nucleoplasm,nucleus,NuRD complex	cerebral cortex neuron differentiation,histone H3-K27 trimethylation,histone H4 acetylation,negative regulation of cell proliferation,positive regulation of signal transduction by p53 class mediator,regulation of cell differentiation,regulation of transcription involved in cell fate commitment,spermatogenesis, exchange of chromosomal proteins,transcription from RNA polymerase II promoter	ATP binding,chromatin binding,DNA binding,DNA helicase activity,H3K27me3 modified histone binding,histone deacetylase binding,metal ion binding	4.25375e-19	641.21	370.99	NaN	NaN	325.546	445.916	NaN	NaN	249.693	NaN	717.849	483.771	0.921749	0.871989	-0.117554	0.0594892
A2A8L5	Ptprf	Mus musculus	Receptor-type tyrosine-protein phosphatase F	endosome,excitatory synapse,growth cone,integral component of postsynaptic density membrane,intracellular membrane-bounded organelle,membrane,neuronal cell body,neuron projection,plasma membrane	cell migration,homophilic cell adhesion via plasma membrane adhesion molecules,negative regulation of cell proliferation,negative regulation of cell projection organization,negative regulation of cytokine-mediated signaling pathway,negative regulation of epidermal growth factor receptor signaling pathway,negative regulation of insulin receptor signaling pathway,negative regulation of neurotrophin…	cell adhesion molecule binding,chondroitin sulfate proteoglycan binding,heparin binding,insulin receptor binding,phosphate ion binding,phosphoprotein phosphatase activity,macromolecular complex binding,protein tyrosine phosphatase activity,receptor tyrosine kinase binding,transmembrane receptor protein tyrosine phosphatase activity	2.56653e-05	127.871	137.519	110.822	112.184	111.704	120.02	116.381	114.886	107.897	114.21	133.1	117.295	1.02323	0.700968	0.0331375	0.154302
A2A8U2	Tmem201	Mus musculus	Transmembrane protein 201	integral component of nuclear inner membrane,nuclear envelope,nuclear membrane	centrosome localization,fibroblast migration,nuclear envelope organization,nuclear migration,nuclear migration along microtubule,protein localization to nuclear envelope	actin filament binding,lamin binding	1.88017e-13	141.615	189.258	110.14	88.5942	116.948	129.311	131.817	169.136	206.146	168.068	221.293	179.292	0.721232	0.0645956	-0.471465	1.1898
A2A8Z1	Osbpl9	Mus musculus	Oxysterol-binding protein-related protein 9	cytosol,Golgi apparatus,intracellular membrane-bounded organelle,late endosome membrane,membrane		lipid binding,sterol binding,sterol transporter activity	1.89346e-07	106.936	99.6105	83.6144	75.8423	78.6515	88.9309	75.7315	92.7022	77.126	119.088	100.277	92.9849	0.956402	0.697743	-0.0643113	0.156304
A2A9T0	Tbkbp1	Mus musculus	TANK-binding kinase 1-binding protein 1	cytoplasm	I-kappaB kinase/NF-kappaB signaling,innate immune response	metal ion binding	0.00372352	186.815	NaN	NaN	86.1867	115.845	129.616	NaN	95.8392	159.119	NaN	209.891	154.95	0.836501	0.599534	-0.257562	0.222186
A2AAE1	Kiaa1109	Mus musculus	Transmembrane protein KIAA1109	integral component of membrane,nucleus,presynapse	adipose tissue development,endocytic recycling,endosomal transport,fat cell differentiation,lipid metabolic process,lipid storage,nucleus localization,phagocytosis,regulation of cell growth,spermatogenesis,synaptic vesicle endocytosis		0.000813834	159.788	51.4182	107.4	72.1715	71.327	92.4209	NaN	75.8938	103.935	48.0107	73.5571	75.3491	1.22657	0.497729	0.294629	0.303007
A2ADY9	Ddi2	Mus musculus	Protein DDI1 homolog 2	chromosome,cytosol,nucleoplasm	cellular response to hydroxyurea,proteasomal protein catabolic process,protein processing,regulation of DNA stability,regulation of protein stability	aspartic-type endopeptidase activity,identical protein binding,ubiquitin binding	1.76177e-09	552.729	403.275	452.508	394.146	382.666	437.065	378.142	442.549	513.621	541.269	515.019	478.12	0.914132	0.370397	-0.129526	0.431333
A2AF47	Dock11	Mus musculus	Dedicator of cytokinesis protein 11		B cell homeostasis,marginal zone B cell differentiation,positive regulation of filopodium assembly,positive regulation of GTPase activity,small GTPase mediated signal transduction	guanyl-nucleotide exchange factor activity,Rho GTPase binding,Rho guanyl-nucleotide exchange factor activity	8.75678e-05	NaN	33.6388	NaN	NaN	23.2804	28.4596	NaN	48.2376	18.6856	32.96	33.1088	33.248	0.855979	0.643776	-0.224352	0.191265
A2AFR3	Frmpd4	Mus musculus	FERM and PDZ domain-containing protein 4	cytoskeleton,dendritic spine,glutamatergic synapse,postsynaptic density,macromolecular complex	positive regulation of synapse structural plasticity,postsynaptic actin cytoskeleton organization	phosphatidylinositol-4,5-bisphosphate binding	4.73506e-09	98.0297	98.3631	105.496	82.8983	122.586	101.475	98.9096	84.0028	76.8446	74.052	75.3523	81.8323	1.24003	0.0379713	0.310379	1.42054
A2AG50	Map7d2	Mus musculus	MAP7 domain-containing protein 2	microtubule cytoskeleton	microtubule cytoskeleton organization		4.63786e-17	1045.05	1023.93	996.48	975.196	1053.73	1018.88	1058.44	973.473	974.458	1029.21	948.328	996.782	1.02217	0.403966	0.0316309	0.393655
A2AGT5	Ckap5	Mus musculus	Cytoskeleton-associated protein 5	centrosome,condensed chromosome kinetochore,cytoplasm,kinetochore,nucleolus,plasma membrane,macromolecular complex,spindle pole	cell division,central nervous system myelin formation,centrosome cycle,centrosome duplication,establishment or maintenance of microtubule cytoskeleton polarity,locomotory behavior,microtubule polymerization,mitotic spindle organization,mRNA localization resulting in posttranscriptional regulation of gene expression,positive regulation of microtubule nucleation,RNA transport,spindle organization	microtubule binding,microtubule plus end polymerase,ribonucleoprotein complex binding	2.39481e-18	1014.7	1210.28	908.243	782.247	898.383	962.771	718.296	828.518	1059.57	1076.89	1119.14	960.484	1.00238	0.983443	0.00343167	0.00725091
A2AHC3	Camsap1	Mus musculus	Calmodulin-regulated spectrin-associated protein 1	cytoplasm,microtubule	cytoplasmic microtubule organization,cytoskeleton organization,microtubule cytoskeleton organization,negative regulation of microtubule depolymerization,neuron projection development,regulation of cell morphogenesis,regulation of microtubule polymerization	calmodulin binding,microtubule binding,microtubule minus-end binding,spectrin binding	4.8498e-19	309.745	341.58	306.659	262.932	298.58	303.899	281.964	304.931	327.465	322.477	346.259	316.619	0.959826	0.466502	-0.0591557	0.331146
A2AHG0	Lzts3	Mus musculus	Leucine zipper putative tumor suppressor 3	cytoplasm,cytoskeleton,dendritic spine,postsynaptic density,synapse	protein homooligomerization,regulation of dendritic spine morphogenesis	PDZ domain binding,protein self-association	3.26967e-16	477.038	481.221	498.427	441.381	389.555	457.524	446.346	470.573	501.58	454.475	514.736	477.542	0.958082	0.418396	-0.0617786	0.378413
A2AIL4	Ndufaf6	Mus musculus	NADH dehydrogenase (ubiquinone) complex I, assembly factor 6	cytoplasm,mitochondrial inner membrane,mitochondrion,nucleus	mitochondrial respiratory chain complex I assembly		0.000149173	472.48	470.294	456.257	554.866	491.174	489.014	523.912	417.688	533.428	574.77	388.135	487.587	1.00293	0.972331	0.00421821	0.0121859
A2AJA9	Ajm1	Mus musculus	Apical junction component 1 homolog	adherens junction,apical plasma membrane,cilium	cell-cell junction organization		3.26689e-15	715.808	698.508	761.988	641.184	635.636	690.625	635.56	655.255	766.599	724.66	737.551	703.925	0.981106	0.709808	-0.0275197	0.148859
A2AJI0	Map7d1	Mus musculus	MAP7 domain-containing protein 1	cytosol,microtubule cytoskeleton,spindle	microtubule cytoskeleton organization		6.55213e-12	835.607	778.161	792.357	982.129	945.047	866.66	1001.28	895.706	713.617	705.162	719.277	807.009	1.07392	0.43671	0.102882	0.359807
A2ALI5	Ajap1	Mus musculus	Adherens junction-associated protein 1	adherens junction,apical plasma membrane,basolateral plasma membrane,cell-cell contact zone,cell surface,cytoplasmic side of plasma membrane,spanning component of plasma membrane	cell adhesion,negative regulation of cell-matrix adhesion,negative regulation of wound healing,regulation of polarized epithelial cell differentiation	beta-catenin binding,macromolecular complex binding	2.65859e-05	145.481	132.849	87.2026	99.5099	36.1764	100.244	83.4273	92.427	90.792	97.5778	80.3964	88.9241	1.1273	0.576903	0.172868	0.238897
A2ALK8	Ptpn3	Mus musculus	Tyrosine-protein phosphatase non-receptor type 3	cytoplasm,cytoplasmic side of plasma membrane,cytoskeleton	liver regeneration,negative regulation of membrane protein ectodomain proteolysis,negative regulation of mitotic cell cycle,protein dephosphorylation,regulation of membrane depolarization during action potential,regulation of sodium ion transmembrane transporter activity	ATPase binding,cytoskeletal protein binding,phosphotyrosine binding,protein tyrosine phosphatase activity,sodium channel regulator activity	9.91247e-05	118.867	156.985	171.163	166.958	180.708	158.936	153.606	135.949	128.532	128.808	91.3908	127.657	1.24502	0.0668993	0.316173	1.17458
A2ALS5	Rap1gap	Mus musculus	Rap1 GTPase-activating protein 1	axon,cytosol,dendrite,early endosome,Golgi membrane,membrane,neuronal cell body	cellular response to glial cell derived neurotrophic factor,negative regulation of GTP binding,negative regulation of microvillus assembly,negative regulation of neuron differentiation,negative regulation of thyroid gland epithelial cell proliferation,positive regulation of cell-cell adhesion,positive regulation of GTPase activity,positive regulation of phagocytosis,regulation of GTPase activity,…	GTPase activator activity,protein homodimerization activity,Ras GTPase binding	2.92874e-17	1281.15	1219.69	1234.23	1299.67	1200.82	1247.11	1188.71	1156.76	1196.64	1202.3	1216.75	1192.23	1.04603	0.0320817	0.0649226	1.49374
A2ALU4	Shroom2	Mus musculus	Protein Shroom2	adherens junction,apical junction complex,apical plasma membrane,bicellular tight junction,cell-cell junction,cell cortex,cytoplasm,cytoskeleton,microtubule,neuronal cell body,plasma membrane	actin cytoskeleton organization,actin filament organization,apical protein localization,brain development,camera-type eye development,camera-type eye morphogenesis,cell-cell junction maintenance,cell migration,cellular pigment accumulation,ear development,establishment of melanosome localization,eye pigment granule organization,lens morphogenesis in camera-type eye,melanosome organization,negativ…	actin binding,actin filament binding,beta-catenin binding,protein domain specific binding	2.72676e-20	368.563	305.575	364.7	375.649	347.039	352.305	335.579	323.161	289.025	306.139	310.755	312.932	1.12582	0.0292433	0.170978	1.53397
A2AMZ4	Ndufaf8	Mus musculus	NADH dehydrogenase [ubiquinone] 1 alpha subcomplex assembly factor 8	mitochondrion	mitochondrial respiratory chain complex I assembly		6.22025e-05	83.2518	47.3409	NaN	20.0198	83.5658	58.5446	89.6825	105.578	61.3877	48.9242	63.4692	73.8083	0.793197	0.422192	-0.334249	0.37449
A2AN08	Ubr4	Mus musculus	E3 ubiquitin-protein ligase UBR4	centrosome,cytosol,integral component of membrane,nucleoplasm	ubiquitin-dependent protein catabolic process	calmodulin binding,ubiquitin protein ligase activity,ubiquitin-protein transferase activity,zinc ion binding	5.14244e-08	254.014	276.168	204.996	117.395	182.194	206.953	126.011	161.227	280.366	258.112	226.791	210.501	0.983145	0.932157	-0.0245235	0.030511
A2AP18	Plch2	Mus musculus	1-phosphatidylinositol 4,5-bisphosphate phosphodiesterase eta-2	cytoplasm,plasma membrane	lipid catabolic process,phosphatidylinositol-mediated signaling,phosphatidylinositol metabolic process	calcium ion binding,phosphatidylinositol phospholipase C activity,phospholipase C activity	4.31781e-15	854.993	824.71	820.868	798.335	787.23	817.227	761.181	832.772	905.702	955.686	909.98	873.064	0.936045	0.161107	-0.0953503	0.792886
A2APV2	Fmnl2	Mus musculus	Formin-like protein 2	cytosol	cell migration,cortical actin cytoskeleton organization,cytoskeleton organization,regulation of cell morphogenesis,regulation of cell shape	actin filament binding,Rho GTPase binding	7.47496e-13	246.311	277.783	290.404	270.718	301.488	277.341	242.006	241.242	303.491	274.605	228.177	257.904	1.07536	0.276169	0.104825	0.558825
A2APX8	Scn1a	Mus musculus	Sodium channel protein type 1 subunit alpha	axon,axon initial segment,integral component of presynaptic membrane,intercalated disc,membrane,neuronal cell body,node of Ranvier,nuclear body,nucleoplasm,plasma membrane,sodium channel complex,T-tubule,voltage-gated sodium channel complex,Z disc	action potential,adult walking behavior,cardiac muscle cell action potential involved in contraction,detection of mechanical stimulus involved in sensory perception of pain,membrane depolarization during action potential,neuromuscular process controlling posture,neuronal action potential,neuronal action potential propagation,regulation of ion transmembrane transport,regulation of membrane potenti…	cation channel activity,sodium ion binding,voltage-gated ion channel activity,voltage-gated sodium channel activity	0.00011235	3066.12	144.069	16883.2	NaN	18713.9	9701.82	NaN	NaN	2504.6	1740.42	2196.88	2147.3	4.51815	0.234952	2.17573	0.62902
A2APY7	Ndufaf5	Mus musculus	Arginine-hydroxylase NDUFAF5, mitochondrial	extrinsic component of mitochondrial inner membrane,mitochondrion	methylation,mitochondrial respiratory chain complex I assembly,peptidyl-arginine hydroxylation	methyltransferase activity,oxidoreductase activity	1.05323e-15	250.113	169.879	215.988	198.265	203.189	207.487	196.172	223.445	206.818	236.363	175.456	207.651	0.999209	0.992447	-0.00114092	0.00329279
A2AQ19	Rtf1	Mus musculus	RNA polymerase-associated protein RTF1 homolog	Cdc73/Paf1 complex,nucleolus	blastocyst growth,endodermal cell fate commitment,histone H3-K4 trimethylation,negative regulation of transcription from RNA polymerase II promoter,positive regulation of histone H3-K4 methylation,stem cell population maintenance,transcription elongation from RNA polymerase II promoter,Wnt signaling pathway	RNA polymerase II C-terminal domain phosphoserine binding,single-stranded DNA binding	5.62233e-06	192.953	246.667	319.073	168.886	202.426	226.001	207.301	178.815	197.587	245.429	183.443	202.515	1.11597	0.441358	0.158301	0.355209
A2AQ25	Skt	Mus musculus	Sickle tail protein	cytoplasm	embryonic skeletal system development		9.82629e-12	1123.15	1131.66	1168.67	1098.55	1110.49	1126.5	1116.13	1117.63	1320.52	1201.21	1289.48	1208.99	0.931771	0.0979896	-0.101953	1.00882
A2AR02	Ppig	Mus musculus	Peptidyl-prolyl cis-trans isomerase G	cytoplasm,cytosol,intracellular membrane-bounded organelle,nuclear matrix,nuclear speck,nucleus	protein folding,protein peptidyl-prolyl isomerization	cyclosporin A binding,peptidyl-prolyl cis-trans isomerase activity	6.6322e-05	76.4653	32.3027	NaN	77.0225	98.0307	70.9553	66.2662	78.9557	87.2059	83.9418	97.6121	82.7963	0.856986	0.408533	-0.222657	0.388773
A2ARA8	Itga8	Mus musculus	Integrin alpha-8	apical part of cell,cell surface,dendritic spine membrane,endoplasmic reticulum,integrin complex,perikaryon,plasma membrane,postsynaptic density	brain development,cell-matrix adhesion,cell projection organization,establishment of protein localization,extracellular matrix organization,inner ear morphogenesis,integrin-mediated signaling pathway,kidney development,memory,mesodermal cell differentiation,metanephros development,positive regulation of transcription from RNA polymerase II promoter involved in smooth muscle cell differentiation,p…	metal ion binding	0.00046309	NaN	NaN	150.298	139.939	NaN	145.119	NaN	164.959	NaN	NaN	45.5368	105.248	1.37882	0.574354	0.463438	0.24082
A2ARP1	Ppip5k1	Mus musculus	Inositol hexakisphosphate and diphosphoinositol-pentakisphosphate kinase 1	cytosol,plasma membrane	inositol metabolic process,inositol phosphate biosynthetic process	5-diphosphoinositol pentakisphosphate 3-kinase activity,ATP binding,diphosphoinositol-pentakisphosphate kinase activity,inositol-1,3,4,5,6-pentakisphosphate kinase activity,inositol heptakisphosphate kinase activity,inositol hexakisphosphate 1-kinase activity,inositol hexakisphosphate 3-kinase activity,inositol hexakisphosphate 5-kinase activity,inositol hexakisphosphate kinase activity	1.78578e-12	170.786	130.349	150.331	152.865	171.022	155.071	197.453	179.473	157.397	149.838	139.985	164.829	0.940796	0.470257	-0.0880465	0.327665
A2ARS0	Ankrd63	Mus musculus	Ankyrin repeat domain-containing protein 63				4.25096e-13	1257.6	1349.04	1348.94	1259.4	1214.33	1285.86	1229.53	1341.66	1328.29	1456	1269.1	1324.91	0.970525	0.430606	-0.043163	0.36592
A2ASQ1	Agrn	Mus musculus	Agrin	axonal growth cone,basement membrane,cell surface,collagen-containing extracellular matrix,cytosol,extracellular region,extracellular space,glutamatergic synapse,Golgi lumen,integral component of membrane,plasma membrane,sarcolemma,synapse,synaptic cleft	animal organ morphogenesis,chemical synaptic transmission,negative regulation of sodium:potassium-exchanging ATPase activity,negative regulation of sodium ion export from cell,neuromuscular junction development,neurotransmitter receptor metabolic process,plasma membrane organization,positive regulation of filopodium assembly,positive regulation of GTPase activity,positive regulation of neuron apo…	acetylcholine receptor regulator activity,ATPase inhibitor activity,BMP binding,calcium ion binding,chondroitin sulfate binding,dystroglycan binding,heparan sulfate proteoglycan binding,ion channel binding,sialic acid binding,transforming growth factor beta binding	1.5457e-17	2668.28	2544.14	3155.64	3166.16	2541.65	2815.17	3510.09	4236.32	3630.53	6773.58	4974.28	4624.96	0.608691	0.0184428	-0.716217	1.73417
A2ASZ8	Slc25a25	Mus musculus	Calcium-binding mitochondrial carrier protein SCaMC-2	integral component of membrane,mitochondrial inner membrane,mitochondrion	adipose tissue development,ATP metabolic process,calcium ion transmembrane transport,camera-type eye development,cellular respiration,multicellular organism growth,response to activity,response to dietary excess,response to food	ATP transmembrane transporter activity,calcium ion binding	6.44394e-13	1747.31	1742.05	1722.4	1522.42	1478.23	1642.48	1383.48	1423.28	1552.18	1646.8	1508.46	1502.84	1.09292	0.0995755	0.128188	1.00185
A2AT37	Upf2	Mus musculus	Regulator of nonsense transcripts 2	cytoplasm,cytoplasmic ribonucleoprotein granule,cytosol,exon-exon junction complex,nucleus,perinuclear region of cytoplasm,polysome	animal organ regeneration,liver development,nuclear-transcribed mRNA catabolic process, nonsense-mediated decay,response to unfolded protein	RNA binding,telomeric DNA binding	1.78621e-06	228.517	271.903	177.069	212.373	203.065	218.585	159.084	172.686	215.38	230.906	223.69	200.349	1.09102	0.417872	0.125681	0.378957
A2AUM9	Cep152	Mus musculus	Centrosomal protein of 152 kDa	centriole,centrosome,cytoplasm,deuterosome,nucleoplasm,pericentriolar material	cell projection organization,centriole replication,centrosome duplication,de novo centriole assembly	protein kinase binding	4.39005e-07	2349.16	3110.02	2422.73	2014.5	1983.1	2375.9	1451.03	2153.93	2774.25	2656.99	2565.65	2320.37	1.02393	0.864627	0.0341186	0.063171
A2AV25	Fibcd1	Mus musculus	Fibrinogen C domain-containing protein 1	collagen-containing extracellular matrix,extracellular space,integral component of membrane,membrane	cell adhesion	chitin binding,metal ion binding,receptor binding	8.40645e-05	80.9931	105.731	82.5638	45.8267	81.0085	79.2246	46.255	70.8721	67.146	62.3075	99.2848	69.1731	1.14531	0.457862	0.195738	0.339265
A2AWA9	Rabgap1	Mus musculus	Rab GTPase-activating protein 1	cytosol,microtubule organizing center	activation of GTPase activity,cell cycle,intracellular protein transport,regulation of GTPase activity	GTPase activator activity,Rab GTPase binding	1.29531e-17	388.76	471.277	410.743	329.046	366.216	393.208	340.505	363.063	449.409	458.59	404.872	403.288	0.975007	0.76903	-0.0365157	0.114056
A2BDX3	Mocs3	Mus musculus	Adenylyltransferase and sulfurtransferase MOCS3	cytoplasm,cytosol	enzyme active site formation via cysteine modification to L-cysteine persulfide,Mo-molybdopterin cofactor biosynthetic process,protein modification by small protein conjugation,protein urmylation,tRNA thio-modification,tRNA wobble position uridine thiolation,tRNA wobble uridine modification	ATP binding,metal ion binding,molybdopterin-synthase adenylyltransferase activity,molybdopterin-synthase sulfurtransferase activity,nucleotidyltransferase activity,sulfurtransferase activity,thiosulfate sulfurtransferase activity,URM1 activating enzyme activity	9.47209e-13	1729.13	1438.77	1827.26	1222.04	1092.36	1461.91	1362.8	1066.19	1562.78	1575.34	1645.4	1442.5	1.01345	0.915003	0.0192792	0.0385774
A2BE28	Las1l	Mus musculus	Ribosomal biogenesis protein LAS1L	Las1 complex,MLL1 complex,nucleolus,preribosome, large subunit precursor	maturation of 5.8S rRNA,maturation of LSU-rRNA	endonuclease activity	1.05812e-05	62.1109	54.7174	34.9197	37.7734	48.067	47.5177	62.9273	70.6162	NaN	25.3665	49.9311	52.2103	0.910122	0.666922	-0.135868	0.175925
A2BH40	Arid1a	Mus musculus	AT-rich interactive domain-containing protein 1A	brahma complex,nBAF complex,npBAF complex,nuclear chromatin,nucleoplasm,SWI/SNF complex	androgen receptor signaling pathway,ATP-dependent chromatin remodeling,cardiac chamber development,cardiac muscle cell differentiation,chromatin organization,chromatin remodeling,embryo implantation,forebrain development,formation of primary germ layer,gastrulation,glucocorticoid receptor signaling pathway,heterochromatin maintenance,intracellular estrogen receptor signaling pathway,negative regu…	DNA binding,ligand-dependent nuclear receptor binding	1.02618e-07	129.774	132.999	87.7034	105.729	120.224	115.286	87.7771	88.4997	90.6185	86.7397	94.2501	89.577	1.287	0.0161975	0.364018	1.79055
A2BIM8;B5X0G2;P02762;P04938;P11588;P11589;P11591	Mup18;Mup17;Mup6;Mup11;Mup1;Mup2;Mup5	Mus musculus	Major urinary protein 18;Major urinary protein 17;Major urinary protein 6;Major urinary protein 11;Major urinary protein 1;Major urinary protein 2;Major urinary protein 5	extracellular region;extracellular region;cytosol,extracellular space,nucleus;cytosol,extracellular space,nucleus;cytosol,extracellular space,nucleus;cytosol,extracellular space,nucleus;cytosol,extracellular space,nucleus	behavior;;aerobic respiration,cellular response to lipid,energy reserve metabolic process,glucose homeostasis,heat generation,locomotor rhythm,mitochondrion morphogenesis,negative regulation of gluconeogenesis,negative regulation of insulin secretion involved in cellular response to glucose stimulus,negative regulation of lipid biosynthetic process,negative regulation of lipid storage,negative re…	pheromone binding,small molecule binding;pheromone binding,small molecule binding;insulin-activated receptor activity,pheromone binding,small molecule binding;insulin-activated receptor activity,pheromone binding,small molecule binding;insulin-activated receptor activity,pheromone activity,pheromone binding,small molecule binding;insulin-activated receptor activity,pheromone binding,small molecul…	1.76233e-06	632.121	121.187	553.875	436.257	251.534	398.995	363.564	376.826	183.634	111.231	180.86	243.223	1.64045	0.189345	0.714091	0.722746
A2CG49	Kalrn	Mus musculus	Kalirin	cytoskeleton,cytosol,glutamatergic synapse,neuronal cell body,neuron projection,nucleoplasm,perinuclear region of cytoplasm,postsynaptic density,presynapse	adult locomotory behavior,axonogenesis,habituation,intracellular signal transduction,lactation,maternal behavior,maternal process involved in parturition,memory,modification of postsynaptic actin cytoskeleton,negative regulation of growth hormone secretion,nervous system development,neuromuscular junction development,neurotransmitter receptor localization to postsynaptic specialization membrane,N…	ATP binding,enzyme binding,guanyl-nucleotide exchange factor activity,metal ion binding,protein serine/threonine kinase activity,Rho guanyl-nucleotide exchange factor activity	1.00253e-15	472.906	451.846	448.229	400.156	395.917	433.811	377.812	401.083	459.852	518.038	487.099	448.777	0.966652	0.634338	-0.048932	0.19768
A2RSJ4	Uhrf1bp1l	Mus musculus	UHRF1-binding protein 1-like	cytosol,early endosome		GARP complex binding,protein homodimerization activity	1.53896e-09	243.311	257.42	240.109	221.569	213.935	235.269	201.203	208.225	263.994	279.326	249.598	240.469	0.978373	0.770702	-0.0315437	0.113113
A2RSQ0	Dennd5b	Mus musculus	DENN domain-containing protein 5B	integral component of membrane	positive regulation of triglyceride transport	Rab guanyl-nucleotide exchange factor activity	0.000162339	53.0072	70.7591	31.6483	42.6925	61.9903	52.0195	39.3571	39.0595	37.8465	69.9251	NaN	46.5471	1.11757	0.615114	0.160362	0.211044
A2RSX7	Tyw5	Mus musculus	tRNA wybutosine-synthesizing protein 5		wybutosine biosynthetic process	oxidoreductase activity, acting on paired donors, with incorporation or reduction of molecular oxygen, 2-oxoglutarate as one donor, and incorporation of one atom each of oxygen into both donors,iron ion binding,protein homodimerization activity,tRNA binding,tRNAPhe (7-(3-amino-3-carboxypropyl)wyosine37-C2)-hydroxylase activity	1.79276e-08	706.374	571.181	751.077	502.921	442.087	594.728	358.941	508.267	428.733	589.975	547.579	486.699	1.22196	0.171959	0.2892	0.764575
A2RT62	Fbxl16	Mus musculus	F-box/LRR-repeat protein 16	cytoplasm,SCF ubiquitin ligase complex	SCF-dependent proteasomal ubiquitin-dependent protein catabolic process,ubiquitin-dependent protein catabolic process		2.00153e-15	2358.88	2255.5	2431.48	2468.09	2242.27	2351.24	2305.84	2354.17	2426.62	2284.46	2287.14	2331.64	1.00841	0.719754	0.0120754	0.142816
A2RTL5	Rsrc2	Mus musculus	Arginine/serine-rich coiled-coil protein 2				3.96075e-08	100.607	54.5657	67.7243	50.1019	26.5171	59.9031	53.348	61.4806	75.039	92.1209	102.361	76.87	0.779278	0.297315	-0.359789	0.526783
A3KFX0	Nt5c1a	Mus musculus	Cytosolic 5'-nucleotidase 1A	cytosol	adenosine metabolic process,nucleotide metabolic process,purine nucleoside monophosphate catabolic process	5'-nucleotidase activity,magnesium ion binding,nucleotide binding	2.07512e-09	161.289	182.99	125.299	128.098	154.529	150.441	197.629	178.603	144.914	106.375	106.795	146.863	1.02436	0.871363	0.0347255	0.0598006
A3KGB4	Tbc1d8b	Mus musculus	TBC1 domain family member 8B	cytosol	activation of GTPase activity,glomerular filtration,intracellular protein transport,vesicle-mediated transport	calcium ion binding,GTPase activator activity,Rab GTPase binding	0.00310228	81.1769	59.1002	59.347	47.118	54.5214	60.2527	70.637	23.6003	NaN	57.9571	NaN	50.7315	1.18768	0.483552	0.248145	0.315557
A3KMP2	Ttc38	Mus musculus	Tetratricopeptide repeat protein 38				1.71594e-13	447.54	400.734	410.129	456.649	443.416	431.694	471.334	497.378	418.88	394.664	375.617	431.575	1.00028	0.99639	0.000397767	0.00157064
A6H5Z3	Exoc6b	Mus musculus	Exocyst complex component 6B	exocyst,membrane	exocytosis,Golgi to plasma membrane transport,vesicle docking involved in exocytosis		2.02444e-15	541.446	630.328	582.525	541.599	569.464	573.073	554.51	548.737	602.123	692.125	600.498	599.599	0.955761	0.409252	-0.0652788	0.388009
A6H611	Mipep	Mus musculus	Mitochondrial intermediate peptidase	mitochondrial matrix,mitochondrion	peptide metabolic process,protein processing involved in protein targeting to mitochondrion,proteolysis	endopeptidase activity,metal ion binding,metalloendopeptidase activity	3.43846e-10	165.059	159.987	197.681	169.674	157.44	169.968	165.199	173.449	174.464	189.138	161.399	172.73	0.984013	0.758507	-0.023251	0.120041
A6H630	Armt1	Mus musculus	Damage-control phosphatase ARMT1		cellular response to DNA damage stimulus,methylation,regulation of response to DNA damage stimulus	enzyme binding,metal ion binding,phosphatase activity,protein carboxyl O-methyltransferase activity,S-adenosylmethionine-dependent methyltransferase activity	4.42631e-16	801.884	749.055	865.5	807.408	860.489	816.867	831.11	890.14	759.069	779.438	827.884	817.528	0.999191	0.983671	-0.00116737	0.0071503
A6H6A9	Rabgap1l	Mus musculus	Rab GTPase-activating protein 1-like	cilium,early endosome,Golgi apparatus,nucleus	activation of GTPase activity,endocytosis,intracellular protein transport,megakaryocyte development,regulation of protein localization	GTPase activator activity,Rab GTPase binding	3.7485e-12	116.656	137.969	131.466	101.199	102.267	117.912	135.72	122.68	131.615	133.985	135.094	131.819	0.894499	0.113578	-0.160848	0.944705
A6H6E2	Mmrn2	Mus musculus	Multimerin-2	basement membrane,collagen-containing extracellular matrix,extracellular matrix,extracellular space	cell migration involved in sprouting angiogenesis,negative regulation of cell migration involved in sprouting angiogenesis,negative regulation of vascular endothelial growth factor receptor signaling pathway		1.2459e-06	78.5885	98.6179	145.599	138.072	95.7189	111.319	98.7394	128.669	68.0082	197.464	130.84	124.744	0.892379	0.607323	-0.164271	0.216581
A6H8H5;Q03717	Kcnb2;Kcnb1	Mus musculus	Potassium voltage-gated channel subfamily B member 2;Potassium voltage-gated channel subfamily B member 1	dendrite,integral component of membrane,neuronal cell body,neuronal cell body membrane,perikaryon,plasma membrane,voltage-gated potassium channel complex;axon,cell surface,dendrite,dendrite membrane,endoplasmic reticulum,integral component of membrane,lateral plasma membrane,membrane,neuronal cell body,neuronal cell body membrane,perikaryon,plasma membrane,postsynaptic membrane,sarcolemma,voltage…	potassium ion transmembrane transport,potassium ion transport,protein homooligomerization,protein localization to plasma membrane,regulation of ion transmembrane transport;action potential,cellular response to glucose stimulus,cellular response to nutrient levels,glucose homeostasis,glutamate receptor signaling pathway,negative regulation of insulin secretion,positive regulation of calcium ion-de…	delayed rectifier potassium channel activity,ion channel binding,protein heterodimerization activity,voltage-gated potassium channel activity;delayed rectifier potassium channel activity,ion channel binding,outward rectifier potassium channel activity,protein heterodimerization activity,protein N-terminus binding,SNARE binding,voltage-gated potassium channel activity	4.395e-07	360.591	446.729	288.53	NaN	150.533	311.596	181.766	NaN	282.399	334.469	307.232	276.466	1.12707	0.638232	0.172572	0.195021
A6X919	Dpy19l1	Mus musculus	Probable C-mannosyltransferase DPY19L1	integral component of membrane,nuclear inner membrane	protein C-linked glycosylation via 2'-alpha-mannosyl-L-tryptophan	mannosyltransferase activity	7.40104e-05	190.54	37.5842	19.5608	70.2289	NaN	79.4784	NaN	69.9654	132.193	121.057	116.758	109.993	0.722575	0.48334	-0.468781	0.315747
A8Y5H7	Sec14l1	Mus musculus	SEC14-like protein 1	cytoplasm,cytosol,Golgi apparatus,nucleoplasm	choline transport,innate immune response,negative regulation of RIG-I signaling pathway	RIG-I binding	2.48723e-09	494.482	739.117	452.333	692.912	740.219	623.813	589.206	669.926	603.447	625.738	592.913	616.246	1.01228	0.908934	0.0176067	0.0414677
B0F2B4	Nlgn4l	Mus musculus	Neuroligin 4-like	cell surface,dendrite,excitatory synapse,integral component of plasma membrane,plasma membrane,postsynaptic membrane,presynapse,synapse	brainstem development,cerebellum development,chemical synaptic transmission,male courtship behavior,modulation of synaptic transmission,negative regulation of excitatory postsynaptic potential,neuron cell-cell adhesion,organ growth,postsynaptic membrane assembly,presynaptic membrane assembly,social behavior,synaptic vesicle endocytosis,territorial aggressive behavior,vocalization behavior	neurexin family protein binding,signaling receptor activity	3.54961e-19	165.134	168.761	186.556	121.631	157.663	159.949	141.033	153.233	166.083	161.692	137.767	151.962	1.05256	0.525958	0.0739046	0.279049
B0V2N1	Ptprs	Mus musculus	Receptor-type tyrosine-protein phosphatase S	axon,cytosol,glutamatergic synapse,growth cone,integral component of postsynaptic density membrane,integral component of presynaptic membrane,integral component of synaptic vesicle membrane,perikaryon,plasma membrane,Schaffer collateral - CA1 synapse	cerebellum development,cerebral cortex development,corpus callosum development,establishment of endothelial intestinal barrier,hippocampus development,modulation of synaptic transmission,negative regulation of axon extension,negative regulation of axon regeneration,negative regulation of collateral sprouting,negative regulation of dendritic spine development,negative regulation of interferon-alph…	chondroitin sulfate binding,heparan sulfate proteoglycan binding,heparin binding,phosphoprotein phosphatase activity,protein tyrosine phosphatase activity	3.42632e-14	2244.89	2404.98	2213.95	2258.12	2290.65	2282.52	2177.88	2059.25	2361.82	2476.83	2503.97	2315.95	0.985565	0.726348	-0.0209772	0.138855
B1AR13	Cisd3	Mus musculus	CDGSH iron-sulfur domain-containing protein 3, mitochondrial	mitochondrion	protein maturation by	2 iron, 2 sulfur cluster binding,metal ion binding	3.36946e-07	395.981	331.277	393.748	379.425	352.496	370.586	404.522	441.326	400.411	392.428	331.431	394.024	0.940516	0.312137	-0.0884756	0.505655
B1ARW8		Mus musculus	Uncharacterized protein C1orf122 homolog				4.79434e-15	152.692	168.965	215.511	157.666	232.81	185.529	233.111	178.784	191.815	149.587	140.272	178.714	1.03813	0.77597	0.0539938	0.110155
B1AS29	Grik3	Mus musculus	Glutamate receptor ionotropic, kainate 3	axon,dendrite,dendrite cytoplasm,integral component of plasma membrane,kainate selective glutamate receptor complex,perikaryon,plasma membrane,postsynaptic membrane,presynaptic membrane,terminal bouton	glutamate receptor signaling pathway,G-protein coupled glutamate receptor signaling pathway,modulation of synaptic transmission,negative regulation of synaptic transmission, glutamatergic,regulation of membrane potential,synaptic transmission, glutamatergic	adenylate cyclase inhibiting G-protein coupled glutamate receptor activity,glutamate receptor activity,ionotropic glutamate receptor activity,kainate selective glutamate receptor activity,ligand-gated ion channel activity,signaling receptor activity,transmitter-gated ion channel activity involved in regulation of postsynaptic membrane potential	1.13961e-07	169.439	161.196	130.885	121.602	119.314	140.487	117.403	117.675	123.71	135.914	164.872	131.915	1.06498	0.548579	0.0908318	0.260761
B1AVZ0	Uprt	Mus musculus	Uracil phosphoribosyltransferase homolog	cytosol,intracellular membrane-bounded organelle,nucleoplasm	female pregnancy,lactation,nucleoside metabolic process,response to insulin,UMP biosynthetic process	GTP binding,kinase activity	1.02456e-11	1627.82	1640.3	1752.24	1823.59	1617.47	1692.28	1789.88	1787.25	1787.79	1898.6	1473.52	1747.41	0.968454	0.522924	-0.0462449	0.281561
B1AWN6	Scn2a	Mus musculus	Sodium channel protein type 2 subunit alpha	axon,axon initial segment,intercalated disc,intrinsic component of plasma membrane,membrane,neuron projection,node of Ranvier,paranode region of axon,plasma membrane,sodium channel complex,T-tubule,voltage-gated sodium channel complex	cellular response to hypoxia,intrinsic apoptotic signaling pathway in response to osmotic stress,membrane depolarization during action potential,memory,nervous system development,neuronal action potential,neuron apoptotic process,regulation of ion transmembrane transport,sodium ion transmembrane transport,sodium ion transport	cation channel activity,leucine zipper domain binding,sodium ion binding,voltage-gated ion channel activity involved in regulation of presynaptic membrane potential,voltage-gated sodium channel activity	4.54595e-15	563.67	703.401	431.975	283.022	301.125	456.638	192.914	272.321	548.952	574.355	589.266	435.561	1.04839	0.860194	0.0681761	0.0654038
B1AXH1	Nhsl2	Mus musculus	NHS-like protein 2		cell differentiation		9.0633e-06	313.826	267.095	291.183	301.766	285.884	291.951	282.932	259.12	260.43	265.27	293.452	272.241	1.0724	0.0941137	0.100842	1.02635
B1AXP6	Tomm5	Mus musculus	Mitochondrial import receptor subunit TOM5 homolog	integral component of membrane,mitochondrial outer membrane translocase complex,mitochondrion	protein targeting to mitochondrion		3.67212e-06	1841.02	1188.29	1870.01	1385.09	1395.74	1536.03	1191.85	1518.94	1510.27	1344.81	1348.94	1382.96	1.11068	0.333182	0.151447	0.477318
B1AXV0	Frrs1l	Mus musculus	DOMON domain-containing protein FRRS1L	integral component of membrane,plasma membrane,synapse	regulation of glutamate receptor signaling pathway,regulation of postsynaptic specialization membrane neurotransmitter receptor levels		1.74891e-16	400.544	331.194	329.41	263.503	269.458	318.822	202.819	333.183	368.796	486.391	464.122	371.062	0.859214	0.383282	-0.218911	0.416482
B1AY10	Nfx1	Mus musculus	Transcriptional repressor NF-X1	cytosol,nucleolus,nucleoplasm,nucleus,plasma membrane	negative regulation of MHC class II biosynthetic process,negative regulation of transcription from RNA polymerase II promoter,protein autoubiquitination,regulation of transcription, DNA-templated	RNA polymerase II transcription factor activity, sequence-specific DNA binding,transcriptional repressor activity, RNA polymerase II transcription regulatory region sequence-specific binding,RNA polymerase II regulatory region sequence-specific DNA binding,ubiquitin protein ligase activity,zinc ion binding	0.000257744	108.803	130.82	106.582	125.989	97.8608	114.011	NaN	81.9755	85.7519	88.9845	111.105	91.9542	1.23987	0.0454935	0.310184	1.34205
B1AY13	Usp24	Mus musculus	Ubiquitin carboxyl-terminal hydrolase 24	cytosol,nucleus	protein deubiquitination,ubiquitin-dependent protein catabolic process	cysteine-type endopeptidase activity,thiol-dependent ubiquitin-specific protease activity	4.82713e-10	80.3518	98.0723	71.216	44.5734	53.3586	69.5144	35.2448	55.1764	78.2271	101.189	82.9624	70.5599	0.985183	0.945863	-0.0215366	0.0241716
B1AZA5	Tmem245	Mus musculus	Transmembrane protein 245	integral component of membrane			0.000109049	NaN	40.7602	NaN	NaN	NaN	40.7602	NaN	NaN	NaN	36.8336	36.517	36.6753	1.11138	#DIV/0!	0.152354	#DIV/0!
B1AZP2	Dlgap4	Mus musculus	Disks large-associated protein 4	dendrite,neuronal cell body,plasma membrane,synapse	signaling	protein domain specific binding	6.95974e-18	1454.71	1394.6	1342.96	1271.61	1241.23	1341.02	1266.44	1208.4	1454.77	1428.56	1423.21	1356.27	0.988754	0.81541	-0.0163159	0.0886241
B2RQC6	Cad	Mus musculus	CAD protein	cell projection,cytoplasm,cytosol,neuronal cell body,nuclear matrix,nucleoplasm,nucleus,macromolecular complex,terminal bouton	'de novo' pyrimidine nucleobase biosynthetic process,'de novo' UMP biosynthetic process,animal organ regeneration,cellular response to drug,cellular response to epidermal growth factor stimulus,citrulline biosynthetic process,drug metabolic process,female pregnancy,glutamine metabolic process,heart development,lactation,liver development,nitrogen compound metabolic process,peptidyl-threonine phos…	amino acid binding,aspartate carbamoyltransferase activity,ATP binding,carbamoyl-phosphate synthase (glutamine-hydrolyzing) activity,dihydroorotase activity,enzyme binding,identical protein binding,protein kinase activity,UTP binding,zinc ion binding	1.00068e-10	154.535	165.594	158.359	139.719	131.638	149.969	135.01	134.047	153.199	207.05	153.633	156.588	0.95773	0.664287	-0.0623088	0.177644
B2RR83	Ythdc2	Mus musculus	3'-5' RNA helicase YTHDC2	cytoplasm,endoplasmic reticulum,nucleus,ribonucleoprotein granule	germline cell cycle switching, mitotic to meiotic cell cycle,meiotic cell cycle,oocyte development,positive regulation by host of viral genome replication,response to interleukin-1,response to tumor necrosis factor,spermatid development	3'-5' RNA helicase activity,ATP binding,N6-methyladenosine-containing RNA binding,RNA binding,RNA-dependent ATPase activity,RNA polymerase binding	1.41045e-05	77.9933	111.385	81.4028	44.1015	74.0642	77.7894	71.0956	76.2683	69.0344	75.2869	69.1896	72.175	1.07779	0.617541	0.108076	0.209334
B2RRE7	Otud4	Mus musculus	OTU domain-containing protein 4	cytosol,nucleus	innate immune response,negative regulation of interleukin-1-mediated signaling pathway,negative regulation of toll-like receptor signaling pathway,positive regulation of DNA demethylation,protein deubiquitination,protein K48-linked deubiquitination,protein K63-linked deubiquitination,regulation of protein K48-linked deubiquitination	Lys63-specific deubiquitinase activity,binding, bridging,thiol-dependent ubiquitin-specific protease activity	6.71999e-13	92.5903	105.231	61.5634	41.8607	61.2573	72.5005	60.9836	43.9316	46.0833	40.9682	36.1062	45.6146	1.58942	0.0598063	0.668497	1.22325
B2RSH2	Gnai1	Mus musculus	Guanine nucleotide-binding protein G(i) subunit alpha-1	cell cortex region,centrosome,cytoplasm,heterotrimeric G-protein complex,membrane,membrane raft,midbody,nucleus,plasma membrane,macromolecular complex	adenylate cyclase-modulating G-protein coupled receptor signaling pathway,cell cycle,cell division,cellular response to forskolin,G-protein coupled receptor signaling pathway,negative regulation of synaptic transmission,positive regulation of protein localization to cell cortex,regulation of cAMP-mediated signaling,regulation of mitotic spindle organization	GDP binding,G-protein beta/gamma-subunit complex binding,G-protein coupled receptor binding,G-protein coupled serotonin receptor binding,GTPase activating protein binding,GTPase activity,GTP binding,magnesium ion binding	3.46131e-16	3574.19	3730.05	3619.67	3460.86	3880.28	3653.01	3198.05	3698.22	3740.15	3878.88	3809.78	3665.02	0.996723	0.933862	-0.00473497	0.0297173
B2RUJ5	Apba1	Mus musculus	Amyloid-beta A4 precursor protein-binding family A member 1	cytoplasm,dendritic spine,glutamatergic synapse,Golgi apparatus,membrane,nucleus,perinuclear region of cytoplasm,plasma membrane,macromolecular complex,Schaffer collateral - CA1 synapse,synapse,synaptic vesicle	chemical synaptic transmission,gamma-aminobutyric acid secretion,glutamate secretion,intracellular protein transport,in utero embryonic development,locomotory behavior,multicellular organism growth,macromolecular complex assembly,regulation of gene expression,regulation of synaptic vesicle exocytosis	beta-amyloid binding,PDZ domain binding,phosphatidylinositol-4,5-bisphosphate binding,macromolecular complex binding	9.60845e-12	522.617	550.25	590.52	588.812	620.344	574.508	597.846	479.138	588.179	547.874	576.183	557.844	1.02987	0.559656	0.042466	0.252079
B2RUR8	Otud7b	Mus musculus	OTU domain-containing protein 7B	cytoplasm,nucleus	adaptive immune response,mucosal immune response,negative regulation of I-kappaB kinase/NF-kappaB signaling,negative regulation of interleukin-8 production,negative regulation of protein localization to nucleus,negative regulation of transcription from RNA polymerase II promoter,protein deubiquitination,protein deubiquitination involved in ubiquitin-dependent protein catabolic process,protein K11…	cysteine-type peptidase activity,DNA binding,K63-linked polyubiquitin binding,Lys48-specific deubiquitinase activity,thiol-dependent ubiquitin-specific protease activity,thiol-dependent ubiquitinyl hydrolase activity,zinc ion binding	5.85644e-06	313.992	360.625	500.764	386.829	284.186	369.279	331.745	323.282	380.215	338.388	223.704	319.467	1.15592	0.305192	0.209046	0.515427
B2RXC1	Trappc11	Mus musculus	Trafficking protein particle complex subunit 11	Golgi apparatus,TRAPP complex	constitutive secretory pathway,ER to Golgi vesicle-mediated transport,Golgi organization,regulation of protein complex stability		1.36615e-13	298.081	369.728	262.728	274.282	315.919	304.148	263.755	249.959	326.516	321.21	279.18	288.124	1.05561	0.527693	0.0780819	0.277619
B2RXS4	Plxnb2	Mus musculus	Plexin-B2	collagen-containing extracellular matrix,integral component of plasma membrane,semaphorin receptor complex	brain development,excitatory synapse assembly,homophilic cell adhesion via plasma membrane adhesion molecules,negative regulation of cell adhesion,neural tube closure,neuroblast proliferation,positive regulation of axonogenesis,positive regulation of neuron projection development,positive regulation of translation,regulation of cell migration,regulation of cell shape,regulation of GTPase activity…	semaphorin receptor activity	2.58443e-16	898.986	975.166	826.363	945.626	834.679	896.164	981.151	857.509	904.852	1012.3	854.938	922.151	0.97182	0.567302	-0.0412397	0.246186
B2RY56	Rbm25	Mus musculus	RNA-binding protein 25	cytoplasm,nuclear speck	apoptotic process,mRNA processing,regulation of alternative mRNA splicing, via spliceosome,regulation of apoptotic process,RNA splicing	mRNA binding	1.33888e-15	405.362	404.888	422.289	461.076	410.967	420.916	404.287	399.803	465.793	430.425	472.148	434.491	0.968757	0.480836	-0.045793	0.318003
B5TVM2	Ildr2	Mus musculus	Immunoglobulin-like domain-containing receptor 2	endoplasmic reticulum membrane,integral component of membrane	cell differentiation,homeostasis of number of cells within a tissue,insulin secretion,pancreas development,response to glucose		6.04285e-07	277.489	240.892	189.694	93.9179	155.219	191.442	177.31	150.777	226.034	267.812	211.353	206.657	0.926376	0.698938	-0.11033	0.155561
B7ZMP1	Xpnpep3	Mus musculus	Xaa-Pro aminopeptidase 3	mitochondrion	glomerular filtration,protein processing	aminopeptidase activity,manganese ion binding,metalloaminopeptidase activity,peptidase activity,protein homodimerization activity	1.89575e-10	274.082	215.783	266.56	215.912	197.355	233.938	225.951	231.098	246.081	271.396	235.783	242.062	0.966441	0.650631	-0.0492458	0.186666
B8ZXI1	Qtrt2	Mus musculus	Queuine tRNA-ribosyltransferase accessory subunit 2	cytoplasm,mitochondrial outer membrane,mitochondrion,macromolecular complex	tRNA-guanine transglycosylation	protein heterodimerization activity,protein homodimerization activity,queuine tRNA-ribosyltransferase activity,zinc ion binding	2.81229e-05	158.891	105.338	83.4089	160.166	155.7	132.701	157.964	163.154	131.624	145.285	109.208	141.447	0.938165	0.653565	-0.092086	0.184711
B9EHT4	Clip3	Mus musculus	CAP-Gly domain-containing linker protein 3	cytoplasm,early endosome membrane,Golgi stack,membrane raft,microtubule plus-end,nucleus,plasma membrane,recycling endosome membrane,trans-Golgi network,trans-Golgi network membrane	chaperone-mediated protein transport,cytoplasmic microtubule organization,fat cell differentiation,membrane biogenesis,negative regulation of microtubule polymerization,peptidyl-L-cysteine S-palmitoylation,positive regulation of apoptotic process,positive regulation of endocytosis,positive regulation of glucose transport,positive regulation of protein localization to plasma membrane,positive regu…	ganglioside binding,microtubule binding,microtubule plus-end binding	5.65392e-09	123.965	111.653	115.562	90.4858	99.3723	108.207	79.4266	100.44	96.0845	118.646	92.1463	97.3487	1.11155	0.248066	0.152567	0.605433
B9EJ80	Pdzd8	Mus musculus	PDZ domain-containing protein 8	endoplasmic reticulum membrane,integral component of membrane,ER-mitochondrion membrane contact site,mitochondrion	cytoskeleton organization,intracellular signal transduction,lipid transport,mitochondrial calcium ion homeostasis,mitochondrion-ER tethering,regulation of cell morphogenesis	lipid binding,metal ion binding	3.93049e-06	134.771	148.905	105.887	78.7234	90.3615	111.73	79.9965	53.1664	141.828	95.9136	85.4644	91.2739	1.22411	0.327157	0.291738	0.485244
B9EJ86	Osbpl8	Mus musculus	Oxysterol-binding protein-related protein 8	cortical endoplasmic reticulum,cytosol,endoplasmic reticulum,endoplasmic reticulum membrane,integral component of membrane,intracellular membrane-bounded organelle,membrane,nuclear membrane	activation of protein kinase B activity,fat cell differentiation,negative regulation of cell migration,negative regulation of sequestering of triglyceride,phospholipid transport,positive regulation of glucose import,positive regulation of insulin receptor signaling pathway,positive regulation of protein kinase B signaling,protein localization to nuclear pore	cholesterol binding,lipid binding,phosphatidylinositol-4-phosphate binding,phosphatidylserine binding,phosphatidylserine transfer activity,sterol binding,sterol transporter activity	1.72542e-16	384.578	501.997	415.024	380.338	361.422	408.672	325.198	345.068	468.042	488.167	443.393	413.973	0.987194	0.901282	-0.0185943	0.0451391
B9EJA2	Cttnbp2	Mus musculus	Cortactin-binding protein 2	cell cortex,dendritic spine,glutamatergic synapse,synaptic vesicle	brain development,regulation of modification of postsynaptic actin cytoskeleton,regulation of synapse organization	SH3 domain binding	1.93356e-15	1156.42	995.105	1070.27	1001.26	1023.5	1049.31	1019.64	966.517	1126.27	1124.11	1120.61	1071.43	0.979357	0.633003	-0.0300934	0.198594
B9EJR8	Dnaaf5	Mus musculus	Dynein assembly factor 5, axonemal	cytoplasm	cilium movement,inner dynein arm assembly,outer dynein arm assembly	dynein intermediate chain binding	7.68032e-05	50.1647	33.5812	29.7824	33.7102	NaN	36.8096	NaN	36.7581	37.8044	56.9731	64.2886	48.9561	0.751891	0.192188	-0.411405	0.716275
B9EKI3	Tmf1	Mus musculus	TATA element modulatory factor	endoplasmic reticulum,Golgi apparatus,Golgi membrane,nucleus	acrosome assembly,androgen receptor signaling pathway,cellular response to organic cyclic compound,defense response to bacterium,flagellated sperm motility,Leydig cell differentiation,luteinizing hormone secretion,male gonad development,negative regulation of apoptotic process,negative regulation of gene expression,positive regulation of cytokine production,positive regulation of testosterone sec…	androgen receptor binding,DNA binding,ligand-dependent nuclear receptor transcription coactivator activity	0.00277411	NaN	NaN	50.2196	51.7965	NaN	51.008	NaN	41.4398	NaN	57.3281	46.4829	48.4169	1.05352	0.698711	0.0752119	0.155703
B9EKR1	Ptprz1	Mus musculus	Receptor-type tyrosine-protein phosphatase zeta	axon,cytoplasm,dendrite,dendritic spine,extracellular matrix,extracellular space,filopodium,glutamatergic synapse,growth cone,integral component of postsynaptic density membrane,intrinsic component of plasma membrane,lamellipodium,membrane,neuronal cell body,perineuronal net,plasma membrane,postsynaptic membrane,ruffle membrane	axonal fasciculation,axonogenesis,hematopoietic progenitor cell differentiation,learning or memory,negative regulation of cell proliferation,negative regulation of cell-substrate adhesion,negative regulation of dendrite development,negative regulation of neuron apoptotic process,oligodendrocyte differentiation,peptidyl-tyrosine dephosphorylation,positive regulation of cell migration,positive regu…	fibroblast growth factor binding,integrin binding,phosphatase activity,protein tyrosine phosphatase activity	1.06008e-11	8859.49	8305.92	8139.64	8104.56	7979.86	8277.89	7449.37	7948.8	7849.38	8104.24	8175.18	7905.39	1.04712	0.0999593	0.0664264	1.00018
C0HKD8;C0HKD9	Mfap1a;Mfap1b	Mus musculus	Microfibrillar-associated protein 1A;Microfibrillar-associated protein 1B	centrosome,collagen-containing extracellular matrix,microfibril,nucleoplasm,nucleus,U2-type precatalytic spliceosome,U2-type spliceosomal complex;centrosome,collagen-containing extracellular matrix,microfibril,nucleoplasm,nucleus,U2-type precatalytic spliceosome,U2-type spliceosomal complex	mRNA splicing, via spliceosome;mRNA splicing, via spliceosome	;	3.27287e-07	89.7026	89.7896	97.5605	63.3805	113.866	90.8598	98.0592	99.5888	100.275	69.8963	92.7341	92.1108	0.98642	0.903143	-0.0197267	0.0442435
C0HKE1;C0HKE2;C0HKE3;C0HKE4;C0HKE5;C0HKE6;C0HKE7;C0HKE8;C0HKE9;Q8BFU2;Q8CGP5;Q8CGP6;Q8CGP7;Q8R1M2	H2ac4;H2ac6;H2ac7;H2ac8;H2ac11;H2ac13;Hist1h2an;Hist1h2ao;Hist1h2ap;H2aw;Hist1h2af;H2ac12;H2ac15;H2aj	Mus musculus	Histone H2A type 1-B;Histone H2A type 1-C;Histone H2A type 1-D;Histone H2A type 1-E;Histone H2A type 1-G;Histone H2A type 1-I;Histone H2A type 1-N;Histone H2A type 1-O;Histone H2A type 1-P;Histone H2A type 3;Histone H2A type 1-F;Histone H2A type 1-H;Histone H2A type 1-K;Histone H2A.J	nuclear chromatin,nucleosome,nucleus;nuclear chromatin,nucleosome,nucleus;nuclear chromatin,nucleosome,nucleus;nuclear chromatin,nucleosome,nucleus;nuclear chromatin,nucleosome,nucleus;nuclear chromatin,nucleosome,nucleus;nuclear chromatin,nucleosome,nucleus;nuclear chromatin,nucleosome,nucleus;nuclear chromatin,nucleosome;nuclear chromatin,nuclear nucleosome;nuclear chromatin,nucleosome;nuclear …	chromatin organization,chromatin silencing;chromatin organization,chromatin silencing;chromatin organization,chromatin silencing;chromatin organization,chromatin silencing;chromatin organization,chromatin silencing,negative regulation of cell proliferation;chromatin organization,chromatin silencing,negative regulation of cell proliferation;chromatin organization,chromatin silencing;chromatin orga…	DNA binding,protein heterodimerization activity;DNA binding,enzyme binding,protein heterodimerization activity;DNA binding,enzyme binding,protein heterodimerization activity;DNA binding,enzyme binding,protein heterodimerization activity;DNA binding,protein heterodimerization activity;DNA binding,protein heterodimerization activity;DNA binding,enzyme binding,protein heterodimerization activity;DNA…	3.27414e-12	2250.6	2564.85	2516.29	2409.67	2638.8	2476.04	2293.13	2494.05	1966.27	2182.04	1955.82	2178.26	1.13671	0.0407455	0.184858	1.38992
C0HKG5;C0HKG6	Rnaset2a;Rnaset2b	Mus musculus	Ribonuclease T2-A;Ribonuclease T2-B	endoplasmic reticulum lumen,extracellular region,extracellular space,lysosomal lumen,lysosome,mitochondrial intermembrane space;endoplasmic reticulum lumen,extracellular region,extracellular space,lysosomal lumen,lysosome,mitochondrial intermembrane space	innate immune response,RNA catabolic process;innate immune response,RNA catabolic process	endoribonuclease activity,lyase activity,ribonuclease activity,ribonuclease T2 activity,RNA binding;endoribonuclease activity,lyase activity,ribonuclease activity,ribonuclease T2 activity,RNA binding	9.63489e-06	27.3506	24.3775	56.1788	69.3259	16.392	38.7249	40.3668	32.0935	48.0498	46.9236	24.5169	38.3901	1.00872	0.976736	0.0125281	0.0102228
D3YVF0	Akap5	Mus musculus	A-kinase anchor protein 5	asymmetric synapse,basolateral plasma membrane,cytoplasm,cytoplasmic side of plasma membrane,cytoskeleton,dendrite,dendrite membrane,dendritic shaft,dendritic spine,dendritic spine membrane,excitatory synapse,filopodium membrane,glutamatergic synapse,membrane raft,neuronal cell body,perinuclear region of cytoplasm,plasma membrane,postsynaptic density,postsynaptic density, intracellular component,…	adenylate cyclase-inhibiting G-protein coupled receptor signaling pathway,amylase secretion,cellular protein complex disassembly,clustering of voltage-gated calcium channels,clustering of voltage-gated potassium channels,negative regulation of adenylate cyclase activity,negative regulation of ion transport,negative regulation of potassium ion transport,positive regulation of adenylate cyclase act…	actin binding,adenylate cyclase binding,beta-2 adrenergic receptor binding,cadherin binding,calmodulin binding,GABA receptor binding,glutamate receptor binding,G-protein coupled receptor binding,kinase binding,binding, bridging,macromolecular complex binding,protein domain specific binding,protein kinase A regulatory subunit binding,protein kinase binding,protein phosphatase 2B binding,scaffold p…	7.08695e-15	1564.26	1541.62	1532.1	1463.73	1480.29	1516.4	1580.38	1422.18	1576.88	1669.17	1667.58	1583.24	0.957784	0.20848	-0.0622283	0.680935
D3YWQ0	Dgki	Mus musculus	Diacylglycerol kinase iota	axon terminus,cytoplasm,cytosol,dendritic spine,excitatory synapse,extrinsic component of postsynaptic density membrane,extrinsic component of presynaptic active zone membrane,glutamatergic synapse,guanyl-nucleotide exchange factor complex,neuronal cell body,nucleus,perinuclear region of cytoplasm,postsynaptic density,presynaptic active zone,macromolecular complex,Schaffer collateral - CA1 synaps…	diacylglycerol metabolic process,excitatory postsynaptic potential,glycerolipid metabolic process,habituation,intracellular signal transduction,lipid phosphorylation,neurotransmitter secretion,positive regulation of Ras protein signal transduction,protein kinase C-activating G-protein coupled receptor signaling pathway,regulation of GTPase activity,regulation of long term synaptic depression,regu…	ATP binding,diacylglycerol kinase activity,GTPase inhibitor activity,NAD+ kinase activity,Ras GTPase binding	5.51673e-15	639.569	605.846	668.048	609.459	656.223	635.829	627.083	613.162	600.199	651.37	654.663	629.295	1.01038	0.698781	0.0149023	0.155659
D3YXJ0	Dgkh	Mus musculus	Diacylglycerol kinase eta	actin cytoskeleton,cytoplasm,endosome,plasma membrane,macromolecular complex	diacylglycerol metabolic process,glycerolipid metabolic process,intracellular signal transduction,lipid phosphorylation,negative regulation of catalytic activity,phosphatidic acid biosynthetic process,phosphatidic acid metabolic process,protein kinase C-activating G-protein coupled receptor signaling pathway	ATP binding,diacylglycerol kinase activity,identical protein binding,kinase binding,metal ion binding,NAD+ kinase activity,protein homodimerization activity,SAM domain binding	2.2601e-14	808.122	772.122	742.266	689.04	743.954	751.101	709.014	748.947	785.346	829.678	769.494	768.496	0.977365	0.551007	-0.0330307	0.258843
D3YXK2	Safb	Mus musculus	Scaffold attachment factor B1	nucleoplasm,nucleus	hormone metabolic process,intracellular estrogen receptor signaling pathway,positive regulation of transcription from RNA polymerase II promoter,regulation of growth,regulation of mRNA processing,regulation of transcription from RNA polymerase II promoter	chromatin binding,RNA binding,RNA polymerase II core promoter proximal region sequence-specific DNA binding,sequence-specific DNA binding	1.38584e-18	337.664	311.271	314.215	314.964	313.66	318.355	274.498	265.651	283.838	317.416	312.911	290.863	1.09452	0.042972	0.130297	1.36681
D3YZI9	Pgbd5	Mus musculus	PiggyBac transposable element-derived protein 5	nucleus	non-replicative transposition, DNA-mediated	endonuclease activity,transposase activity	8.52716e-08	363.981	452.064	289.024	285.83	304.793	339.138	218.588	288.158	350.982	405.063	322.766	317.111	1.06946	0.632887	0.0968841	0.198674
D3YZP9	Ccdc6	Mus musculus	Coiled-coil domain-containing protein 6	cytoskeleton,cytosol		identical protein binding,SH3 domain binding	2.64126e-12	1552.51	1352.44	1466.14	1318.47	1367.42	1411.4	1504.83	1508.72	1294.38	1301.01	1314.43	1384.67	1.0193	0.695766	0.0275757	0.157537
D3YZU1	Shank1	Mus musculus	SH3 and multiple ankyrin repeat domains protein 1	cytoplasm,dendrite,dendritic spine,excitatory synapse,glutamatergic synapse,membrane,neuron projection,neuron spine,NMDA selective glutamate receptor complex,plasma membrane,postsynaptic density,postsynaptic membrane,synapse	adult behavior,associative learning,brain morphogenesis,dendritic spine morphogenesis,determination of affect,habituation,long-term memory,long-term synaptic potentiation,negative regulation of actin filament bundle assembly,neuromuscular process controlling balance,olfactory behavior,positive regulation of dendritic spine development,positive regulation of excitatory postsynaptic potential,posit…	ankyrin repeat binding,identical protein binding,ionotropic glutamate receptor binding,macromolecular complex binding,protein C-terminus binding,scaffold protein binding,SH3 domain binding,receptor signaling complex scaffold activity,somatostatin receptor binding,structural constituent of postsynaptic density,GKAP/Homer scaffold activity	2.11391e-18	1612.3	1480.68	1556.68	1437.76	1326.77	1482.84	1323.97	1403.82	1728.86	1619.03	1721.86	1559.51	0.950836	0.450588	-0.0727309	0.346221
D3Z4S3	Ptrhd1	Mus musculus	Putative peptidyl-tRNA hydrolase PTRHD1			aminoacyl-tRNA hydrolase activity	5.7256e-08	203.372	191.05	181.104	200.416	220.089	199.206	200.152	194.108	145.919	104.639	119.377	152.839	1.30337	0.0521853	0.38225	1.28245
D3Z6Q9	Bin2	Mus musculus	Bridging integrator 2	cell cortex,cell junction,cell projection,phagocytic cup,plasma membrane,podosome	cell chemotaxis,phagocytosis, engulfment,membrane tubulation,podosome assembly	phospholipid binding	0.00582556	22.4377	17.7187	14.0433	NaN	NaN	18.0666	NaN	NaN	29.4541	24.4454	29.8187	27.906	0.647407	0.0300229	-0.627254	1.52255
D3Z7P3	Gls	Mus musculus	Glutaminase kidney isoform, mitochondrial	cytosol,mitochondrial matrix,mitochondrion,synapse	chemical synaptic transmission,glutamate biosynthetic process,glutamate homeostasis,glutamine catabolic process,protein homotetramerization,regulation of respiratory gaseous exchange by neurological system process,suckling behavior	glutaminase activity,identical protein binding	2.90155e-13	12256.5	12187	13400.7	13858.8	13006.1	12941.8	13144	14023.4	12851.2	11740.4	11785.4	12708.9	1.01833	0.67736	0.0262039	0.16918
D3Z7Q2	Smim20	Mus musculus	Small integral membrane protein 20	extracellular region,integral component of membrane,mitochondrial inner membrane	mitochondrial respiratory chain complex IV assembly		9.01281e-13	616.314	476.226	560.608	413.585	474.674	508.281	515.604	468.35	440.681	379.302	342.312	429.25	1.18412	0.133134	0.24381	0.87571
E0CYV9		Mus musculus	Uncharacterized protein C4orf54 homolog				2.17825e-05	3903.36	3187.81	3249.19	2910.23	2957.07	3241.53	2955.99	2882.53	3832.59	3383.52	3728.57	3356.64	0.965706	0.673095	-0.0503435	0.171923
E9PUL5	Prrt2	Mus musculus	Proline-rich transmembrane protein 2	axon terminus,dendritic spine,integral component of membrane,membrane,neuron projection,plasma membrane,postsynaptic density membrane,presynapse,presynaptic membrane,synaptic vesicle,synaptic vesicle membrane,vesicle	negative regulation of short-term synaptic potentiation,negative regulation of SNARE complex assembly,neuromuscular process controlling posture,synaptic vesicle fusion to presynaptic active zone membrane	SH3 domain binding,syntaxin-1 binding	7.72775e-13	3446.49	3793.12	2729.84	1961.65	2527.77	2891.77	1938.19	2270.46	3423.43	2955.69	3025.73	2722.7	1.0621	0.700716	0.0869181	0.154458
E9PUQ8	Dgkd	Mus musculus	Diacylglycerol kinase delta	clathrin-coated pit,cytoplasm,cytoplasmic vesicle,cytosol,plasma membrane	diacylglycerol metabolic process,endocytosis,glycerolipid metabolic process,intracellular signal transduction,lipid phosphorylation,negative regulation of protein kinase C signaling,phosphatidic acid biosynthetic process,positive regulation of clathrin-dependent endocytosis,positive regulation of epidermal growth factor receptor signaling pathway,protein kinase C-activating G-protein coupled rece…	ATP binding,diacylglycerol kinase activity,identical protein binding,kinase binding,metal ion binding,NAD+ kinase activity,protein heterodimerization activity,protein homodimerization activity	1.23614e-09	233.543	243.705	249.105	258.706	216.918	240.395	228.251	255.884	282.113	242.308	248.402	251.391	0.956258	0.364043	-0.0645275	0.438848
E9PV24	Fga	Mus musculus	Fibrinogen alpha chain	blood microparticle,cell cortex,cell surface,collagen-containing extracellular matrix,cytoplasm,external side of plasma membrane,extracellular space,fibrinogen complex,platelet alpha granule,rough endoplasmic reticulum,synapse	adaptive immune response,blood coagulation,blood coagulation, common pathway,blood coagulation, fibrin clot formation,cell-matrix adhesion,cellular macromolecular complex assembly,fibrinolysis,induction of bacterial agglutination,innate immune response,negative regulation of endothelial cell apoptotic process,negative regulation of extrinsic apoptotic signaling pathway via death domain receptors,…	cell adhesion molecule binding,metal ion binding,receptor binding,structural molecule activity	2.98453e-06	202.188	62.221	73.9698	92.8742	88.8955	104.03	72.8742	162.991	62.7942	74.7965	77.4849	90.1881	1.15347	0.668422	0.205987	0.174949
E9PVA8	Gcn1	Mus musculus	eIF-2-alpha kinase activator GCN1	cytosol,polysome	cellular response to amino acid starvation,cellular response to leucine starvation,positive regulation of kinase activity,positive regulation of transcription from RNA polymerase II promoter in response to stress,regulation of translation	protein kinase binding,protein kinase regulator activity,ribosome binding	4.62907e-10	141.713	159.011	105.075	63.3027	76.0618	109.033	50.0091	81.9369	105.022	137.761	104.537	95.8531	1.1375	0.589036	0.185866	0.229858
E9PXF8	Sbf2	Mus musculus	Myotubularin-related protein 13	axon,endosome membrane,membrane,perinuclear region of cytoplasm,vacuolar membrane	autophagy,regulation of GTPase activity	phosphatase binding,phosphatase regulator activity,phosphatidylinositol binding,Rab guanyl-nucleotide exchange factor activity	4.99245e-05	929.478	404.311	628.319	1226.9	720.391	781.879	976.068	566.444	638.358	NaN	785.817	741.672	1.05421	0.826909	0.0761644	0.0825424
E9PZ19	Igsf9b	Mus musculus	Protein turtle homolog B	dendrite,GABA-ergic synapse,inhibitory synapse,integral component of membrane,neuronal cell body,neuron projection,postsynaptic density,postsynaptic membrane,postsynaptic specialization of symmetric synapse	homophilic cell adhesion via plasma membrane adhesion molecules,nervous system development,positive regulation of inhibitory postsynaptic potential	kinase binding	6.00382e-06	56.6975	69.3194	61.7264	32.0951	36.465	51.2607	43.8846	60.8344	45.1823	50.101	50.7543	50.1513	1.02212	0.890998	0.0315652	0.0501231
E9Q137	Tex264	Mus musculus	Testis-expressed protein 264 homolog	autophagosome membrane,endoplasmic reticulum membrane	reticulophagy	signaling receptor activity	6.52167e-05	50.761	86.9963	86.4177	52.228	68.67	69.0146	65.0987	64.4667	60.4802	65.0214	52.7655	61.5665	1.12098	0.391594	0.164756	0.407164
E9Q3L2	Pi4ka	Mus musculus	Phosphatidylinositol 4-kinase alpha	cytoplasm,Golgi-associated vesicle membrane,membrane,plasma membrane,viral replication complex	multi-organism membrane organization,phosphatidylinositol-mediated signaling,phosphatidylinositol phosphorylation,phosphorylation,viral replication complex formation and maintenance,viral RNA genome replication	1-phosphatidylinositol 4-kinase activity,ATP binding,kinase activity,phosphatidylinositol kinase activity	8.7838e-17	1141.14	1386.41	911.864	652.173	752.182	968.754	541.651	822.279	1149.93	1178.76	1149.12	968.348	1.00042	0.998282	0.000604489	0.000746575
E9Q401	Ryr2	Mus musculus	Ryanodine receptor 2	A band,calcium channel complex,cytoplasm,cytoplasmic vesicle membrane,endoplasmic reticulum,extrinsic component of cytoplasmic side of plasma membrane,integral component of membrane,membrane,neuron projection,nuclear envelope,plasma membrane,macromolecular complex,sarcolemma,sarcomere,sarcoplasmic reticulum,sarcoplasmic reticulum membrane,smooth endoplasmic reticulum,Z disc	calcium ion transmembrane transport,calcium ion transport,calcium ion transport into cytosol,calcium-mediated signaling,calcium-mediated signaling using intracellular calcium source,cardiac muscle contraction,cardiac muscle hypertrophy,cellular calcium ion homeostasis,cellular response to caffeine,cellular response to epinephrine stimulus,cytosolic calcium ion transport,detection of calcium ion,e…	calcium channel activity,calcium-induced calcium release activity,calcium ion binding,calcium-release channel activity,calmodulin binding,enzyme binding,identical protein binding,organic cyclic compound binding,protein kinase A catalytic subunit binding,protein kinase A regulatory subunit binding,protein kinase binding,protein self-association,ryanodine-sensitive calcium-release channel activity,…	9.01524e-20	677.921	695.249	564.192	338.525	399.276	535.033	288.482	411.33	706.346	711.563	682.848	560.114	0.955222	0.831173	-0.0660925	0.0803087
E9Q4N7	Arid1b	Mus musculus	AT-rich interactive domain-containing protein 1B	brahma complex,cytoplasm,cytosol,nBAF complex,nucleoplasm,nucleus,plasma membrane,SWI/SNF complex,synapse	ATP-dependent chromatin remodeling,chromatin remodeling,dendritic cell dendrite assembly,dendritic spine development,neuron-neuron synaptic transmission,positive regulation of transcription, DNA-templated,regulation of transcription from RNA polymerase II promoter	DNA binding	0.000129052	65.2902	65.0195	66.9501	43.8227	44.9917	57.2148	62.5511	59.7825	52.7407	65.2883	55.0119	59.0749	0.968513	0.75394	-0.0461565	0.122663
E9Q4S1	Pde8b	Mus musculus	High affinity cAMP-specific and IBMX-insensitive 3',5'-cyclic phosphodiesterase 8B		behavioral fear response,cAMP catabolic process,negative regulation of insulin secretion,negative regulation of insulin secretion involved in cellular response to glucose stimulus,negative regulation of steroid hormone biosynthetic process,neuromuscular process controlling balance,operant conditioning,signal transduction,visual learning	3',5'-cyclic-AMP phosphodiesterase activity,metal ion binding	1.4059e-08	872.447	484.442	612.495	435.672	320.761	545.164	232.011	469.634	707.884	949.773	818.775	635.616	0.857694	0.585039	-0.221466	0.232816
E9Q557	Dsp	Mus musculus	Desmoplakin	basolateral plasma membrane,cell-cell junction,cell junction,cornified envelope,cytoplasm,cytoskeleton,desmosome,fascia adherens,intercalated disc,membrane,plasma membrane	adherens junction organization,bundle of His cell-Purkinje myocyte adhesion involved in cell communication,cell-cell adhesion,desmosome organization,epithelial cell-cell adhesion,intermediate filament cytoskeleton organization,intermediate filament organization,keratinocyte differentiation,peptide cross-linking,protein localization to cell-cell junction,regulation of heart rate by cardiac conduct…	cell adhesion molecule binding,protein kinase C binding,scaffold protein binding,structural molecule activity	5.07274e-05	240.232	41.4016	141.01	NaN	NaN	140.881	NaN	70.577	70.996	NaN	NaN	70.7865	1.99023	0.413961	0.992932	0.38304
E9Q5C9	Nolc1	Mus musculus	Nucleolar and coiled-body phosphoprotein 1	box C/D snoRNP complex,box H/ACA snoRNP complex,Cajal body,cytoplasm,fibrillar center,nucleolus,nucleoplasm,small nuclear ribonucleoprotein complex	box H/ACA snoRNA metabolic process,neural crest cell development,neural crest formation,nucleolus organization,positive regulation of cell proliferation,positive regulation of transcription, DNA-templated,regulation of protein import into nucleus,regulation of translation,response to osmotic stress	box C/D snoRNA binding,box C/D snoRNP complex binding,box H/ACA snoRNA binding,box H/ACA snoRNP complex binding,DNA binding,transcription factor activity, sequence-specific DNA binding,nuclear localization sequence binding,protein domain specific binding,protein heterodimerization activity,RNA polymerase I core binding,transcription factor binding	7.87729e-05	176.369	85.0856	133.42	131.017	152.841	135.746	153.877	119.013	176.43	181.847	154.925	157.218	0.863426	0.283876	-0.211855	0.546871
E9Q634	Myo1e	Mus musculus	Unconventional myosin-Ie	actin-based cell projection,actin cytoskeleton,adherens junction,brush border,clathrin-coated endocytic vesicle,cuticular plate,cytoplasm,cytoskeleton,microvillus,myosin complex,plasma membrane,macromolecular complex,vesicle	actin filament organization,endocytosis,glomerular basement membrane development,glomerular filtration,glomerular visceral epithelial cell development,hemopoiesis,in utero embryonic development,kidney development,nitrogen compound metabolic process,platelet-derived growth factor receptor signaling pathway,post-embryonic hemopoiesis,vasculogenesis,vesicle transport along actin filament	actin-dependent ATPase activity,actin filament binding,ATPase activity,ATP binding,calmodulin binding,microfilament motor activity,phosphatidylinositol binding,macromolecular complex binding	9.04892e-06	51.2736	NaN	33.7277	26.2858	NaN	37.0957	13.3828	28.3524	86.8843	94.6674	44.8058	53.6185	0.691845	0.481453	-0.53148	0.317446
E9Q6B2	Ccdc85c	Mus musculus	Coiled-coil domain-containing protein 85C	adherens junction,apical junction complex,bicellular tight junction	cerebral cortex development		3.20864e-06	93.3438	82.7503	60.7093	75.3419	86.7524	79.7795	75.0219	60.597	97.2883	106.242	86.5492	85.1398	0.937042	0.599662	-0.0938147	0.222094
E9Q6J5	Bod1l	Mus musculus	Biorientation of chromosomes in cell division protein 1-like 1	centrosome,condensed chromosome outer kinetochore,nucleoplasm,spindle microtubule,spindle pole	cellular response to DNA damage stimulus,DNA repair,negative regulation of phosphoprotein phosphatase activity,replication fork processing	DNA binding,protein phosphatase 2A binding,protein phosphatase inhibitor activity	6.43798e-10	NaN	NaN	NaN	NaN	NaN	#DIV/0!	NaN	NaN	NaN	13.4206	NaN	13.4206	#DIV/0!	#DIV/0!	#DIV/0!	#DIV/0!
E9Q6P5	Ttc7b	Mus musculus	Tetratricopeptide repeat protein 7B	cytosol,plasma membrane	phosphatidylinositol phosphorylation,protein localization to plasma membrane		4.79521e-15	716.701	845.71	772.631	733.349	712.294	756.137	648.25	685.135	804.503	795.461	785.205	743.711	1.01671	0.767243	0.0239065	0.115067
E9Q735	Ube4a	Mus musculus	Ubiquitin conjugation factor E4 A	cytoplasm,nucleus,ubiquitin ligase complex	protein polyubiquitination,ER-associated ubiquitin-dependent protein catabolic process	ubiquitin protein ligase activity,ubiquitin-ubiquitin ligase activity	6.58511e-08	62.9489	74.7523	68.4025	35.6125	39.4742	56.2381	27.2699	33.796	46.3802	49.4816	52.4135	41.8683	1.34321	0.158779	0.425689	0.799206
E9Q7G0	Numa1	Mus musculus	Nuclear mitotic apparatus protein 1	cell cortex,cell cortex region,centrosome,chromosome,cortical microtubule,cytoplasmic microtubule bundle,cytosol,dendrite,extrinsic component of plasma membrane,Golgi apparatus,Golgi membrane,lateral cell cortex,lateral plasma membrane,microtubule bundle,microtubule minus-end,microtubule plus-end,mitotic spindle,mitotic spindle astral microtubule,mitotic spindle midzone,mitotic spindle pole,neuro…	anastral spindle assembly,astral microtubule organization,cell division,chromosome segregation,establishment of mitotic spindle orientation,Golgi ribbon formation,late endosome to Golgi transport,meiotic cell cycle,microtubule bundle formation,microtubule organizing center organization,positive regulation of BMP signaling pathway,positive regulation of chromosome segregation,positive regulation o…	disordered domain specific binding,dynein complex binding,microtubule binding,microtubule minus-end binding,microtubule plus-end binding,phosphatidylinositol binding,macromolecular complex binding,protein C-terminus binding,protein domain specific binding,tubulin binding	3.42353e-11	306.032	299.532	272.5	337.875	310.994	305.387	296.819	317.02	336.578	352.104	309.151	322.334	0.947422	0.272954	-0.0779216	0.563911
E9Q7X7	Nrxn2	Mus musculus	Neurexin-2	integral component of membrane,presynaptic membrane,macromolecular complex	adult behavior,cell adhesion,chemical synaptic transmission,gephyrin clustering involved in postsynaptic density assembly,neuroligin clustering involved in postsynaptic membrane assembly,neurotransmitter secretion,postsynaptic density protein 95 clustering,postsynaptic membrane assembly,signal transduction,social behavior,synapse assembly,vocalization behavior,vocal learning	calcium channel regulator activity,cell adhesion molecule binding,metal ion binding,neuroligin family protein binding,transmembrane signaling receptor activity	1.33623e-17	364.433	428.537	364.811	334.742	423.079	383.12	375.772	316.869	396.579	398.554	350.901	367.735	1.04184	0.537365	0.0591308	0.269731
E9Q8I9	Fry	Mus musculus	Protein furry homolog	cell cortex,microtubule organizing center,site of polarized growth,spindle pole	cell morphogenesis,negative regulation of tubulin deacetylation,neuron projection development	enzyme inhibitor activity	1.02739e-11	262.219	307.247	258.266	151.049	211.407	238.038	137.868	209.608	305.86	290.045	235.623	235.801	1.00949	0.956903	0.013621	0.0191323
E9QA62	Lmod3	Mus musculus	Leiomodin-3	A band,cytoplasm,cytoskeleton,M band,myofibril,striated muscle thin filament	actin filament organization,actin nucleation,muscle contraction,myofibril assembly,pointed-end actin filament capping,positive regulation of skeletal muscle fiber development,skeletal muscle fiber development,skeletal muscle thin filament assembly,striated muscle contraction	actin monomer binding,tropomyosin binding	0.00753539	6217.38	5378.23	7085.52	6576.49	5255.49	6102.62	4503.7	NaN	NaN	NaN	NaN	4503.7	1.35502	#DIV/0!	0.438318	#DIV/0!
E9QAT4	Sec16a	Mus musculus	Protein transport protein Sec16A	cytosol,endoplasmic reticulum,endoplasmic reticulum exit site,endoplasmic reticulum membrane,ER to Golgi transport vesicle membrane,Golgi apparatus,Golgi membrane,organelle membrane,perinuclear region of cytoplasm	COPII vesicle coating,endoplasmic reticulum organization,ER to Golgi vesicle-mediated transport,Golgi organization,Golgi to plasma membrane CFTR protein transport,positive regulation of protein exit from endoplasmic reticulum,protein exit from endoplasmic reticulum,protein localization to endoplasmic reticulum exit site,protein localization to plasma membrane,protein stabilization,response to end…		2.09428e-08	264.584	240.439	169.382	187.595	185.693	209.538	199.556	203.514	269.801	231.759	274.118	235.75	0.888818	0.308995	-0.17004	0.510049
F6SEU4	Syngap1	Mus musculus	Ras/Rap GTPase-activating protein SynGAP	dendritic shaft,glutamatergic synapse,membrane,plasma membrane,postsynaptic density,postsynaptic density, intracellular component,synapse	dendrite development,negative regulation of axonogenesis,negative regulation of neuron apoptotic process,negative regulation of Ras protein signal transduction,pattern specification process,Ras protein signal transduction,receptor clustering,regulation of long-term neuronal synaptic plasticity,regulation of MAPK cascade,regulation of synapse structure or activity,regulation of synaptic plasticity…	GTPase activator activity,protein kinase binding,SH3 domain binding	7.49496e-20	2605.03	2869.47	2651.75	2692.98	2791.44	2722.14	2676.17	2776.41	2982.9	2955.65	2982.66	2874.76	0.94691	0.0896681	-0.0787004	1.04736
F6W8I0	Yjefn3	Mus musculus	YjeF N-terminal domain-containing protein 3	membrane,mitochondrion	hematopoietic stem cell proliferation,lipid transport,membrane raft distribution,negative regulation of angiogenesis,regulation of cholesterol efflux,regulation of Notch signaling pathway,sprouting angiogenesis	NADHX epimerase activity,NADPHX epimerase activity	1.14159e-05	370.342	304.387	408.562	314.824	305.021	340.627	311.51	445.793	338.359	348.567	392.034	367.253	0.927501	0.422235	-0.10858	0.374446
F6ZDS4	Tpr	Mus musculus	Nucleoprotein TPR	cytoplasm,cytoplasmic dynein complex,extrinsic component of membrane,kinetochore,mitotic spindle,nuclear envelope,nuclear inclusion body,nuclear membrane,nuclear periphery,nuclear pore,nuclear pore nuclear basket,nucleus	cell division,cellular response to heat,cellular response to interferon-alpha,mitotic spindle assembly checkpoint,mRNA export from nucleus,mRNA export from nucleus in response to heat stress,negative regulation of RNA export from nucleus,negative regulation of transcription from RNA polymerase II promoter,negative regulation of translational initiation,nuclear pore organization,positive regulatio…	chromatin binding,dynein complex binding,heat shock protein binding,mitogen-activated protein kinase binding,mRNA binding,protein homodimerization activity,structural constituent of nuclear pore,tubulin binding	2.66456e-14	458.141	484.44	483.481	425.647	485.128	467.367	425.575	409.725	470.16	504.02	500.932	462.082	1.01144	0.819976	0.0164068	0.0861987
F7BWT7	Tspan15	Mus musculus	Tetraspanin-15	cell surface,integral component of plasma membrane,late endosome membrane,plasma membrane,tetraspanin-enriched microdomain	negative regulation of Notch signaling pathway,protein localization to plasma membrane,protein maturation	enzyme binding	0.000306566	265.131	NaN	NaN	130.472	NaN	197.801	NaN	NaN	277.483	201.486	192.549	223.839	0.883675	0.698549	-0.178412	0.155803
F8VPU2	Farp1	Mus musculus	FERM, ARHGEF and pleckstrin domain-containing protein 1	cytoskeleton,cytosol,dendrite,dendritic spine,extrinsic component of cytoplasmic side of plasma membrane,extrinsic component of postsynaptic membrane,filopodium,glutamatergic synapse	dendrite morphogenesis,negative regulation of phosphatase activity,postsynaptic actin cytoskeleton organization,regulation of presynapse assembly,retrograde trans-synaptic signaling by trans-synaptic protein complex,synapse assembly	cytoskeletal protein binding,Rac GTPase binding,Rac guanyl-nucleotide exchange factor activity	2.7627e-11	1074.96	1195.75	1101.19	1090.24	1089.3	1110.29	1045.09	1051.9	1201.53	1206.03	1142.14	1129.34	0.983133	0.655585	-0.0245417	0.183371
G3UWD5	Akain1	Mus musculus	A-kinase anchor protein inhibitor 1	cytosol	negative regulation of protein complex assembly,protein localization	protein kinase A binding	0.00444794	NaN	NaN	97.2515	80.8996	50.9238	76.3583	NaN	NaN	70.3727	NaN	NaN	70.3727	1.08506	#DIV/0!	0.11777	#DIV/0!
G3X9J0	Sipa1l3	Mus musculus	Signal-induced proliferation-associated 1-like protein 3	apical part of cell,apical plasma membrane,Golgi apparatus,nucleoplasm,plasma membrane,stress fiber,tricellular tight junction	cytoskeleton organization,epithelial cell morphogenesis,establishment of epithelial cell polarity,eye development,hematopoietic progenitor cell differentiation,regulation of small GTPase mediated signal transduction	GTPase activator activity	1.81255e-11	232.801	170.857	183.091	162.833	161.049	182.126	177.55	161.236	193.283	178.901	173.301	176.854	1.02981	0.720428	0.0423784	0.142409
G3X9K3	Arfgef1	Mus musculus	Brefeldin A-inhibited guanine nucleotide-exchange protein 1	cytosol,Golgi apparatus,Golgi membrane,nuclear matrix,nucleolus,nucleoplasm,perinuclear region of cytoplasm,small nuclear ribonucleoprotein complex,trans-Golgi network	endomembrane system organization,Golgi organization,negative regulation of actin filament polymerization,negative regulation of GTPase activity,neuron projection development,positive regulation of protein glycosylation in Golgi,positive regulation of protein kinase B signaling,positive regulation of wound healing,protein transport,regulation of ARF protein signal transduction,regulation of establ…	ARF guanyl-nucleotide exchange factor activity,guanyl-nucleotide exchange factor activity,myosin binding,protein kinase A regulatory subunit binding	4.61558e-09	217.463	258.67	196.28	143.164	171.527	197.421	147.102	147.556	195.868	202.344	215.308	181.636	1.08691	0.535465	0.120228	0.271269
G3XA57	Rab11fip2	Mus musculus	Rab11 family-interacting protein 2	endosome,intracellular membrane-bounded organelle,nucleoplasm,phagocytic cup,recycling endosome membrane	establishment of cell polarity,insulin secretion involved in cellular response to glucose stimulus,phagocytosis,positive regulation of GTPase activity,positive regulation of protein localization to plasma membrane,regulated exocytosis,TRAM-dependent toll-like receptor 4 signaling pathway	identical protein binding,protein homodimerization activity,protein kinase binding,Rab GTPase binding	1.1707e-20	615.273	676.678	635.914	627.774	624.837	636.095	639.4	642.916	657.996	654.459	585.881	636.13	0.999945	0.998384	-7.9817e-05	0.000702468
G5E829	Atp2b1	Mus musculus	Plasma membrane calcium-transporting ATPase 1	apical part of cell,apical plasma membrane,basolateral plasma membrane,cytoplasmic side of plasma membrane,dendrite membrane,dendritic spine membrane,GABA-ergic synapse,glutamatergic synapse,immunological synapse,integral component of plasma membrane,integral component of presynaptic active zone membrane,intracellular membrane-bounded organelle,membrane raft,neuronal cell body membrane,nucleoplas…	aging,brain development,calcium ion export,calcium ion export from cell,calcium ion transport,cellular calcium ion homeostasis,cellular response to corticosterone stimulus,cellular response to vitamin D,negative regulation of cytokine production,negative regulation of cytosolic calcium ion concentration,neural retina development,positive regulation of bone mineralization,positive regulation of ca…	ATPase activity,cation-transporting ATPase activity,ATP binding,calcium ion transmembrane transporter activity,calcium-transporting ATPase activity,calcium-transporting ATPase activity involved in regulation of presynaptic cytosolic calcium ion concentration,calmodulin binding,metal ion binding,PDZ domain binding	8.32023e-16	5474.79	7133.04	5093.38	3643.74	4221.9	5113.37	3252.54	4655.51	6341.77	6154.22	5927.12	5266.23	0.970974	0.859452	-0.0424956	0.0657782
G5E870	Trip12	Mus musculus	E3 ubiquitin-protein ligase TRIP12	nuclear speck,nucleoplasm	cellular response to DNA damage stimulus,DNA repair,negative regulation of double-strand break repair,negative regulation of histone H2A K63-linked ubiquitination,protein polyubiquitination,regulation of double-strand break repair,regulation of embryonic development,ubiquitin-dependent protein catabolic process	thyroid hormone receptor binding,ubiquitin protein ligase activity,zinc ion binding	2.25893e-05	72.0128	74.6457	63.9304	50.4333	71.5465	66.5137	62.7843	61.3633	62.6636	80.6105	55.9168	64.6677	1.02855	0.768685	0.0406069	0.114251
G5E8K5	Ank3	Mus musculus	Ankyrin-3	axon,axon initial segment,basal plasma membrane,basolateral plasma membrane,cell surface,dendrite,intercalated disc,lateral plasma membrane,lysosome,membrane,neuromuscular junction,neuron projection,node of Ranvier,paranode region of axon,plasma membrane,postsynaptic membrane,sarcolemma,sarcoplasmic reticulum,spectrin-associated cytoskeleton,synapse,T-tubule,Z disc	axon guidance,axonogenesis,cellular response to magnesium ion,clustering of voltage-gated sodium channels,establishment of protein localization,Golgi to plasma membrane protein transport,magnesium ion homeostasis,maintenance of protein location in plasma membrane,membrane assembly,mitotic cytokinesis,negative regulation of delayed rectifier potassium channel activity,neuromuscular junction develo…	cadherin binding,cytoskeletal protein binding,ion channel binding,phosphorylation-dependent protein binding,protein binding, bridging,spectrin binding,structural constituent of cytoskeleton	8.05332e-18	1078.48	1190.72	1152.96	1076.53	1055.87	1110.91	1011.9	1018.29	1195.24	1121.38	1160.37	1101.44	1.0086	0.839426	0.0123612	0.0760174
L0N7N1	Kif14	Mus musculus	Kinesin-like protein KIF14	cytosol,Flemming body,kinesin complex,membrane,microtubule,midbody,nucleus,plasma membrane,spindle midzone	activation of protein kinase activity,cell division,cell proliferation in forebrain,cerebellar cortex development,cerebellar granular layer structural organization,cerebellar Purkinje cell layer structural organization,cerebral cortex development,establishment of protein localization,hippocampus development,microtubule-based movement,mitotic metaphase plate congression,negative regulation of apop…	ATPase activity,ATP binding,ATP-dependent microtubule motor activity, plus-end-directed,microtubule binding,microtubule motor activity,PDZ domain binding,protein kinase binding,tubulin binding	3.67652e-07	NaN	88.9497	75.488	184.977	101.622	112.759	79.4447	95.0875	159.516	106.008	32.876	94.5865	1.19213	0.584963	0.253537	0.232871
O08528	Hk2	Mus musculus	Hexokinase-2	cytosol,mitochondrial outer membrane,mitochondrion,plasma membrane,sarcoplasmic reticulum	apoptotic mitochondrial changes,carbohydrate phosphorylation,cellular glucose homeostasis,cellular response to leukemia inhibitory factor,establishment of protein localization to mitochondrion,fructose 6-phosphate metabolic process,glucose 6-phosphate metabolic process,glucose metabolic process,glycolytic process,lactation,maintenance of protein location in mitochondrion,negative regulation of mi…	ATP binding,fructokinase activity,glucokinase activity,glucose binding,hexokinase activity,mannokinase activity	4.26095e-05	686.734	752.717	550.529	616.395	422.023	605.68	466.512	544.248	871.057	1068.08	1125.42	815.062	0.743109	0.188074	-0.428354	0.725671
O08529	Capn2	Mus musculus	Calpain-2 catalytic subunit	cell projection,chromatin,cytoplasm,cytosol,dendrite,endoplasmic reticulum,external side of plasma membrane,focal adhesion,Golgi apparatus,lysosome,membrane,membrane raft,mitochondrial intermembrane space,neuronal cell body,nucleus,perinuclear endoplasmic reticulum,plasma membrane,pseudopodium	behavioral response to pain,blastocyst development,cellular response to amino acid stimulus,cellular response to interferon-beta,cellular response to lipopolysaccharide,female pregnancy,myoblast fusion,positive regulation of cardiac muscle cell apoptotic process,positive regulation of myoblast fusion,positive regulation of neuron death,positive regulation of phosphatidylcholine biosynthetic proce…	calcium-dependent cysteine-type endopeptidase activity,calcium ion binding,cytoskeletal protein binding,enzyme binding,peptidase activity,macromolecular complex binding	1.4972e-15	1370.63	1325.21	1508.27	1319.25	1279.09	1360.49	1384.63	1397.76	1313.3	1383.69	1322.77	1360.43	1.00004	0.998979	6.07634e-05	0.000443682
O08530	S1pr1	Mus musculus	Sphingosine 1-phosphate receptor 1	caveola,cytoplasm,endosome,external side of plasma membrane,integral component of membrane,intracellular membrane-bounded organelle,intrinsic component of plasma membrane,nucleoplasm,plasma membrane	actin cytoskeleton reorganization,adenylate cyclase-activating G-protein coupled receptor signaling pathway,adenylate cyclase-inhibiting G-protein coupled receptor signaling pathway,angiogenesis,blood vessel maturation,brain development,cardiac muscle tissue growth involved in heart morphogenesis,cell migration,chemotaxis,endothelial cell differentiation,G-protein coupled receptor signaling pathw…	G-protein coupled receptor activity,G-protein coupled receptor binding,sphingolipid binding,sphingosine-1-phosphate receptor activity	7.16909e-12	307.322	279.392	199.685	157.512	172.099	223.202	119.729	136.082	293.6	305.986	201.422	211.364	1.05601	0.814365	0.0786197	0.0891809
O08532	Cacna2d1	Mus musculus	Voltage-dependent calcium channel subunit alpha-2/delta-1	anchored component of postsynaptic membrane,anchored component of presynaptic active zone membrane,glutamatergic synapse,L-type voltage-gated calcium channel complex,sarcoplasmic reticulum,T-tubule,voltage-gated calcium channel complex	calcium ion transmembrane transport,calcium ion transmembrane transport via high voltage-gated calcium channel,calcium ion transport,calcium ion transport into cytosol,cardiac muscle cell action potential involved in contraction,cellular response to beta-amyloid,membrane depolarization during bundle of His cell action potential,positive regulation of high voltage-gated calcium channel activity,po…	metal ion binding,voltage-gated calcium channel activity,voltage-gated calcium channel activity involved in bundle of His cell action potential	2.53801e-18	5284.76	3521.82	5301.13	3118.86	3105.4	4066.39	2735.47	4169.46	4352.8	8164.46	7412.19	5366.88	0.757684	0.291495	-0.400333	0.535368
O08539	Bin1	Mus musculus	Myc box-dependent-interacting protein 1	axon,axon initial segment,axon terminus,cerebellar mossy fiber,cytoplasm,cytosol,endosome,extrinsic component of synaptic vesicle membrane,glutamatergic synapse,I band,lipid tube,membrane,microtubule,node of Ranvier,nuclear envelope,nucleus,plasma membrane,synapse,synaptic vesicle,T-tubule,varicosity,Z disc	endosome to lysosome transport,lipid tube assembly,muscle cell differentiation,negative regulation of beta-amyloid formation,negative regulation of aspartic-type endopeptidase activity involved in amyloid precursor protein catabolic process,negative regulation of calcium ion transmembrane transport via high voltage-gated calcium channel,negative regulation of potassium ion transmembrane transport…	actin filament binding,aspartic-type endopeptidase inhibitor activity,chaperone binding,GTPase binding,identical protein binding,phospholipid binding,protease binding,macromolecular complex binding,RNA polymerase binding,tau protein binding	1.66138e-13	14441.3	13154.7	14707.3	15533.2	14475.5	14462.4	14402.8	15461.9	14043.9	13191.7	13867.5	14193.6	1.01894	0.628211	0.0270694	0.201895
O08547	Sec22b	Mus musculus	Vesicle-trafficking protein SEC22b	COPI-coated vesicle,endoplasmic reticulum,endoplasmic reticulum-Golgi intermediate compartment,endoplasmic reticulum-Golgi intermediate compartment membrane,endoplasmic reticulum membrane,ER to Golgi transport vesicle membrane,Golgi membrane,integral component of membrane,melanosome,SNARE complex,synaptic vesicle	ER to Golgi vesicle-mediated transport,negative regulation of autophagosome assembly,positive regulation of protein catabolic process,protein transport,retrograde vesicle-mediated transport, Golgi to ER,vesicle fusion with Golgi apparatus,vesicle-mediated transport	SNAP receptor activity,syntaxin binding	3.83554e-13	1835.29	2001.65	1728.32	1370.54	1603.47	1707.85	1457.62	1716.75	1637.91	1675.62	1578.44	1613.27	1.05863	0.437767	0.0821989	0.358757
O08553	Dpysl2	Mus musculus	Dihydropyrimidinase-related protein 2	axon,cytoskeleton,cytosol,dendrite,growth cone,mitochondrion,myelin sheath,neuronal cell body,neuron projection,plasma membrane,presynapse,macromolecular complex,terminal bouton	axon guidance,cytoskeleton organization,endocytosis,olfactory bulb development,positive regulation of glutamate secretion,regulation of axon extension,regulation of neuron differentiation,regulation of neuron projection development,response to amphetamine,response to cocaine,response to drug,spinal cord development,synaptic vesicle transport	hydrolase activity, acting on carbon-nitrogen (but not peptide) bonds,identical protein binding,microtubule binding,protein kinase binding	1.68106e-12	91043.8	91822.5	94013.6	98333.7	92259	93494.5	89819.9	91903.9	98867.5	96788.3	99331.2	95342.2	0.980621	0.446977	-0.028233	0.349715
O08573	Lgals9	Mus musculus	Galectin-9	collagen-containing extracellular matrix,cytoplasm,cytosol,extracellular region,nucleus	cellular response to virus,chemotaxis,female pregnancy,heterophilic cell-cell adhesion via plasma membrane cell adhesion molecules,immune system process,maintenance of protein location,negative regulation of CD4-positive, alpha-beta T cell proliferation,negative regulation of gene expression,negative regulation of inflammatory response,negative regulation of interferon-gamma production,negative r…	carbohydrate binding,enzyme binding,galactoside binding,protein serine/threonine kinase activator activity,receptor binding	2.2463e-12	63.167	55.0648	66.3234	59.5245	46.2077	58.0575	65.1199	63.0423	76.0193	77.5622	76.8414	71.717	0.809535	0.0198866	-0.304834	1.70144
O08576	Rundc3a	Mus musculus	RUN domain-containing protein 3A	cytosol,plasma membrane	positive regulation of cGMP-mediated signaling		6.61756e-12	592.121	573.186	640.681	618.925	631.367	611.256	639.548	539.208	633.299	599.67	600.246	602.394	1.01471	0.694716	0.0210695	0.158193
O08579	Emd	Mus musculus	Emerin	cortical endoplasmic reticulum,cytoplasm,endoplasmic reticulum,integral component of membrane,microtubule,nuclear envelope,nuclear inner membrane,nuclear lamina,nuclear membrane,nuclear outer membrane,nucleoplasm,nucleus,spindle,spindle pole centrosome	cellular response to growth factor stimulus,negative regulation of canonical Wnt signaling pathway,negative regulation of fibroblast proliferation,positive regulation of protein export from nucleus,regulation of canonical Wnt signaling pathway,skeletal muscle cell differentiation	actin binding,beta-tubulin binding	1.27918e-20	492.216	510.459	456.385	423.085	463.284	469.086	395.45	475.018	497.176	405.302	483.495	451.288	1.03944	0.512623	0.0558033	0.290202
O08581	Kcnk1	Mus musculus	Potassium channel subfamily K member 1	apical plasma membrane,brush border membrane,cytoplasm,dendrite,endosome,integral component of membrane,integral component of plasma membrane,intracellular membrane-bounded organelle,inward rectifier potassium channel complex,perikaryon,potassium channel complex,recycling endosome,synaptic membrane	potassium ion transmembrane transport,potassium ion transport,regulation of resting membrane potential,response to nicotine,sodium ion transmembrane transport,stabilization of membrane potential	identical protein binding,inward rectifier potassium channel activity,potassium channel activity,potassium ion leak channel activity,sodium channel activity	1.46417e-16	103.114	225.132	151.836	91.4514	106.163	135.539	106.114	119.536	133.176	128.467	122.191	121.897	1.11192	0.601228	0.153053	0.220961
O08582	Gtpbp1	Mus musculus	GTP-binding protein 1	cytoplasmic exosome (RNase complex),cytosol	GTP metabolic process,positive regulation of mRNA catabolic process,translational elongation	GTPase activity,GTP binding,translation elongation factor activity	1.30499e-11	197.236	196.565	221.481	222.376	225.042	212.54	233.979	225.487	234.049	268.375	214.626	235.303	0.903262	0.0734271	-0.146783	1.13414
O08583	Alyref	Mus musculus	THO complex subunit 4	cytoplasm,nuclear speck,nucleus,spliceosomal complex	mRNA processing,mRNA transport,RNA export from nucleus,RNA splicing	C5-methylcytidine-containing RNA binding,RNA binding,single-stranded DNA binding	5.34339e-17	678.149	613.571	638.195	797.292	950.681	735.578	937.293	776.536	519.608	597.187	607.622	687.649	1.0697	0.636806	0.0972051	0.195993
O08585	Clta	Mus musculus	Clathrin light chain A	clathrin coat,clathrin-coated pit,clathrin-coated vesicle,clathrin coat of coated pit,clathrin coat of trans-Golgi network vesicle,clathrin complex,clathrin vesicle coat,cytoplasmic vesicle,glutamatergic synapse,plasma membrane,postsynaptic endocytic zone,postsynaptic endocytic zone cytoplasmic component,presynaptic endocytic zone membrane,spindle,synaptic vesicle membrane	cell cycle,cell division,clathrin coat assembly,clathrin-dependent endocytosis,intracellular protein transport	clathrin heavy chain binding,GTPase binding,peptide binding,macromolecular complex binding,structural molecule activity	1.67009e-18	20211	16943.9	18434.9	19681.2	18549.4	18764.1	17998.8	20336.6	17281.5	16015.3	16733.5	17673.1	1.06173	0.275651	0.0864159	0.559641
O08586	Pten	Mus musculus	Phosphatidylinositol 3,4,5-trisphosphate 3-phosphatase and dual-specificity protein phosphatase PTEN	apical plasma membrane,cell projection,cytoplasm,cytoplasmic side of plasma membrane,cytosol,dendritic spine,mitochondrion,myelin sheath adaxonal region,neuron projection,nucleoplasm,nucleus,plasma membrane,PML body,postsynaptic cytosol,postsynaptic membrane,Schmidt-Lanterman incisure	adult behavior,aging,angiogenesis,apoptotic process,brain morphogenesis,canonical Wnt signaling pathway,cardiac muscle tissue development,cell migration,cell motility,cellular response to decreased oxygen levels,cellular response to electrical stimulus,cellular response to ethanol,cellular response to hypoxia,cellular response to insulin-like growth factor stimulus,cellular response to insulin st…	anaphase-promoting complex binding,enzyme binding,identical protein binding,inositol-1,3,4,5-tetrakisphosphate 3-phosphatase activity,ionotropic glutamate receptor binding,PDZ domain binding,phosphatidylinositol-3,4,5-trisphosphate 3-phosphatase activity,phosphatidylinositol-3,4-bisphosphate 3-phosphatase activity,phosphatidylinositol-3-phosphatase activity,phosphoprotein phosphatase activity,pla…	8.69676e-10	441.28	483.863	490.197	556.349	519.691	498.276	484.084	494.106	478.257	483.004	436.538	475.198	1.04857	0.317054	0.0684166	0.498867
O08599	Stxbp1	Mus musculus	Syntaxin-binding protein 1	axon,cytoplasm,cytoskeleton,cytosol,extrinsic component of presynaptic active zone membrane,glutamatergic synapse,mitochondrion,myelin sheath,nucleoplasm,nucleus,perinuclear region of cytoplasm,phagocytic vesicle,plasma membrane,platelet alpha granule,postsynapse,presynapse,presynaptic active zone membrane,macromolecular complex,secretory granule	axon target recognition,cellular response to interferon-gamma,developmental process involved in reproduction,exocytosis,intracellular protein transport,long term synaptic depression,negative regulation of neuron apoptotic process,negative regulation of protein complex assembly,negative regulation of synaptic transmission, GABAergic,neuromuscular synaptic transmission,neurotransmitter secretion,pl…	identical protein binding,phospholipase binding,protein domain specific binding,protein kinase binding,protein N-terminus binding,SNARE binding,syntaxin-1 binding,syntaxin binding	2.3524e-16	45299.7	48454.5	48070.5	47047.8	47634.1	47301.3	45967.2	46842.7	47948.6	48237.2	46885.4	47176.2	1.00265	0.860354	0.00382057	0.065323
O08600	Endog	Mus musculus	Endonuclease G, mitochondrial	cytosol,mitochondrial inner membrane,mitochondrion,nucleus,perikaryon	aging,apoptotic DNA fragmentation,cellular response to calcium ion,cellular response to glucose stimulus,cellular response to hypoxia,DNA catabolic process,DNA catabolic process, endonucleolytic,in utero embryonic development,neuron death in response to oxidative stress,positive regulation of apoptotic DNA fragmentation,positive regulation of apoptotic process,positive regulation of hydrogen pero…	deoxyribonuclease activity,endonuclease activity,endoribonuclease activity,metal ion binding,nuclease activity,nucleic acid binding,single-stranded DNA endodeoxyribonuclease activity	5.28185e-11	650.709	422.209	561.995	484.159	314.4	486.694	340.031	582.459	617.445	550.06	603.995	538.798	0.903296	0.517385	-0.146729	0.286186
O08632	Krtap19-5	Mus musculus	Keratin-associated protein 19-5	intermediate filament			3.68885e-06	276.336	NaN	NaN	NaN	47.5493	161.943	NaN	NaN	NaN	NaN	NaN	#DIV/0!	#DIV/0!	#DIV/0!	#DIV/0!	#DIV/0!
O08638	Myh11	Mus musculus	Myosin-11	brush border,melanosome,muscle myosin complex,myofibril,myosin complex,myosin filament,smooth muscle contractile fiber,stress fiber	cardiac muscle fiber development,elastic fiber assembly,skeletal muscle myosin thick filament assembly,smooth muscle contraction	actin filament binding,ATP binding,calmodulin binding,motor activity,structural constituent of muscle	2.40995e-16	1176.44	1321.97	1510.5	1809.45	1236.51	1410.97	1429.36	2055.46	1562.29	3125.86	1908.59	2016.31	0.69978	0.0957857	-0.515026	1.0187
O08648	Map3k4	Mus musculus	Mitogen-activated protein kinase kinase kinase 4	cytoplasm,perinuclear region of cytoplasm	activation of MAPKK activity,chorionic trophoblast cell differentiation,determination of dorsal identity,intracellular signal transduction,male germ-line sex determination,placenta development,positive regulation of JUN kinase activity,positive regulation of p38MAPK cascade,positive regulation of telomerase activity,positive regulation of telomere capping,positive regulation of telomere maintenan…	ATP binding,MAP kinase kinase kinase activity,metal ion binding,protein kinase activity	4.1019e-06	96.2815	205.678	128.594	112.342	130.128	134.605	111.52	114.963	174.297	146.76	109.011	131.31	1.02509	0.888249	0.0357481	0.0514654
O08663	Metap2	Mus musculus	Methionine aminopeptidase 2	cytoplasm,cytosol,plasma membrane	N-terminal protein amino acid modification,peptidyl-methionine modification,protein initiator methionine removal,protein processing	aminopeptidase activity,metal ion binding,metalloaminopeptidase activity,metalloexopeptidase activity	1.62037e-09	1083.62	989.614	1120.96	1018.67	885.123	1019.6	946.361	1085.17	824.655	1154.42	964.075	994.936	1.02479	0.735316	0.0353225	0.133526
O08672	Kifc2	Mus musculus	Kinesin-like protein KIFC2	cytoplasm,kinesin complex,microtubule,microtubule organizing center,mitotic spindle,nucleus	microtubule-based movement,mitotic spindle assembly	ATPase activity,ATP binding,microtubule binding,microtubule motor activity	0.000641908	NaN	113.367	79.4389	84.2357	102.523	94.8912	104.639	126.727	76.5593	56.9055	129.547	98.8755	0.959704	0.826356	-0.0593389	0.0828328
O08688	Capn5	Mus musculus	Calpain-5	cell surface,cytoplasm,synapse	proteolysis	calcium-dependent cysteine-type endopeptidase activity	1.26963e-11	714.813	864.962	767.384	689.707	754.069	758.187	745.276	707.271	854.309	878.737	779.975	793.114	0.955963	0.451678	-0.0649739	0.345171
O08709	Prdx6	Mus musculus	Peroxiredoxin-6	cytoplasm,cytosol,lysosome,mitochondrion,nucleus,perinuclear region of cytoplasm	bleb assembly,cell redox homeostasis,cellular oxidant detoxification,glycerophospholipid catabolic process,hydrogen peroxide catabolic process,positive regulation of mRNA splicing, via spliceosome,response to oxidative stress,response to reactive oxygen species	calcium-independent phospholipase A2 activity,glutathione peroxidase activity,identical protein binding,peroxidase activity,peroxiredoxin activity,phospholipase A2 activity (consuming 1,2-dipalmitoylphosphatidylcholine),phospholipase A2 activity consuming 1,2-dioleoylphosphatidylethanolamine),ubiquitin protein ligase binding	3.06826e-13	26723.1	23822.9	27318	27891.8	25216.7	26194.5	25691.6	27993.3	27465.5	26396.7	26009.8	26711.4	0.980649	0.565144	-0.0281911	0.247841
O08715	Akap1	Mus musculus	A-kinase anchor protein 1, mitochondrial	endoplasmic reticulum,integral component of membrane,lipid particle,mitochondrial crista,mitochondrial outer membrane,mitochondrion,neuromuscular junction,postsynaptic membrane	antiviral innate immune response,negative regulation of cardiac muscle hypertrophy,negative regulation of protein dephosphorylation,negative regulation of protein import into nucleus,regulation of protein kinase A signaling	beta-tubulin binding,microtubule binding,binding, bridging,protein kinase A regulatory subunit binding,protein kinase binding,protein phosphatase 2B binding,protein phosphatase binding,RNA binding	1.3931e-07	315.248	321.954	398.373	229.096	345.031	321.941	354.327	285.697	291.641	374.324	329.212	327.04	0.984407	0.87881	-0.0226737	0.0561049
O08739	Ampd3	Mus musculus	AMP deaminase 3	cytosol	ADP metabolic process,AMP metabolic process,ATP metabolic process,energy homeostasis,erythrocyte homeostasis,GTP metabolic process,IMP biosynthetic process,IMP salvage	AMP deaminase activity,metal ion binding	5.22874e-11	83.0479	73.6701	106.517	86.5691	107.719	91.5045	74.3024	58.9591	89.3486	102.633	82.4154	81.5317	1.12232	0.34452	0.166483	0.462785
O08747	Unc5c	Mus musculus	Netrin receptor UNC5C	axon,cell surface,dendrite,filopodium,growth cone,integral component of membrane,lamellipodium,neuronal cell body,plasma membrane,synapse	anterior/posterior axon guidance,apoptotic process,axon guidance,brain development,chemorepulsion of axon,dorsal root ganglion development,netrin-activated signaling pathway,positive regulation of apoptotic process,regulation of cell migration	netrin receptor activity,netrin receptor activity involved in chemorepulsion,protein kinase binding,tubulin binding	0.000158541	41.0367	105.343	103.13	39.9683	103.139	78.5234	78.3915	64.2236	47.3078	42.1564	21.8791	50.7917	1.54599	0.167843	0.628532	0.775098
O08749	Dld	Mus musculus	Dihydrolipoyl dehydrogenase, mitochondrial	acrosomal matrix,cilium,mitochondrial matrix,mitochondrion,motile cilium,myelin sheath,nucleoplasm,nucleus,oxoglutarate dehydrogenase complex,pyruvate dehydrogenase complex	2-oxoglutarate metabolic process,acetyl-CoA biosynthetic process from pyruvate,aging,cell redox homeostasis,dihydrolipoamide metabolic process,gastrulation,histone succinylation,lipoate metabolic process,mitochondrial acetyl-CoA biosynthetic process from pyruvate,mitochondrial electron transport, NADH to ubiquinone,oxidation-reduction process,proteolysis,regulation of membrane potential,sperm cap…	dihydrolipoyl dehydrogenase activity,flavin adenine dinucleotide binding,lipoamide binding,NAD binding,pyruvate dehydrogenase (NAD+) activity	4.10207e-16	23866.3	22678.5	24148.1	22716.8	22141.6	23110.3	21825.4	22930.2	23822.3	23047	23491.1	23023.2	1.00378	0.869012	0.00544616	0.0609744
O08756	Hsd17b10	Mus musculus	3-hydroxyacyl-CoA dehydrogenase type-2	endoplasmic reticulum,mitochondrial inner membrane,mitochondrial nucleoid,mitochondrial ribonuclease P complex,mitochondrion	mitochondrial tRNA 3'-end processing,mitochondrial tRNA 5'-end processing,mitochondrial tRNA methylation,mitochondrion organization,protein homotetramerization	3-hydroxy-2-methylbutyryl-CoA dehydrogenase activity,3-hydroxyacyl-CoA dehydrogenase activity,acetoacetyl-CoA reductase activity,beta-amyloid binding,dihydrotestosterone 17-beta-dehydrogenase activity,estradiol 17-beta-dehydrogenase activity,estrogen receptor binding,identical protein binding,NAD binding,steroid binding,testosterone dehydrogenase,tRNA binding	1.12316e-12	1110.47	972.01	1102.73	1033.34	1050.77	1053.86	1070.65	1140.93	1026.11	1089.71	1023.62	1070.2	0.984731	0.637112	-0.0221985	0.195784
O08759	Ube3a	Mus musculus	Ubiquitin-protein ligase E3A	cytosol,nucleus,proteasome complex	androgen receptor signaling pathway,cellular response to brain-derived neurotrophic factor stimulus,negative regulation of dendritic spine morphogenesis,ovarian follicle development,positive regulation of Golgi lumen acidification,positive regulation of phosphatidylinositol 3-kinase signaling,positive regulation of protein ubiquitination,positive regulation of transcription from RNA polymerase II…	metal ion binding,transcription coactivator activity,ubiquitin protein ligase activity,ubiquitin-protein transferase activity	5.395e-10	873.279	858.909	889.46	863.056	867.282	870.397	811.085	866.529	871.667	894.426	855.425	859.826	1.01229	0.493649	0.0176284	0.306582
O08784	Tcof1	Mus musculus	Treacle protein	cytosol,fibrillar center,nucleolus,nucleoplasm	neural crest cell development,neural crest formation,transcription of nuclear large rRNA transcript from RNA polymerase I promoter,regulation of translation	protein heterodimerization activity,RNA polymerase I core binding,scaffold protein binding	1.2804e-11	275.253	291.841	343.969	429.52	397.837	347.684	363.172	329.937	386.142	332.694	308.734	344.136	1.01031	0.916104	0.0147987	0.0380551
O08788	Dctn1	Mus musculus	Dynactin subunit 1	axon,cell cortex,cell cortex region,cell leading edge,centriolar subdistal appendage,centriole,centrosome,ciliary basal body,cytoplasm,cytoplasmic dynein complex,cytosol,intercellular bridge,kinetochore,microtubule,microtubule associated complex,microtubule cytoskeleton,microtubule plus-end,mitotic spindle,neuronal cell body,neuron projection,nuclear envelope,nucleus,macromolecular complex,retrom…	cell division,centriole-centriole cohesion,cytoplasmic microtubule organization,establishment of mitotic spindle orientation,melanosome transport,microtubule anchoring at centrosome,motor behavior,neuromuscular junction development,neuromuscular process,neuron cellular homeostasis,neuron projection maintenance,non-motile cilium assembly,nuclear envelope disassembly,nuclear migration,positive regu…	identical protein binding,microtubule binding,microtubule plus-end binding,motor activity,protein kinase binding,tubulin binding	5.08599e-21	2104.95	2145.39	2192.09	2070.43	2172.42	2137.06	2046.58	2088.61	2287.8	2275.26	2281.11	2195.87	0.973217	0.334607	-0.0391671	0.475465
O08795	Prkcsh	Mus musculus	Glucosidase 2 subunit beta	endoplasmic reticulum,glucosidase II complex,intracellular membrane-bounded organelle	in utero embryonic development,liver development,negative regulation of neuron projection development,N-glycan processing,nitrogen compound metabolic process	calcium ion binding,ion channel binding,phosphoprotein binding,macromolecular complex binding,protein kinase C binding,RNA binding	2.30628e-15	3685.84	3358.89	3462.25	3633.63	3431.01	3514.32	3606.79	3278.81	3306.31	3292.73	3320.23	3360.97	1.04563	0.118607	0.0643687	0.925891
O08800	Serpinb8	Mus musculus	Serpin B8	cytoplasm,cytosol,extracellular space	epithelial cell-cell adhesion,negative regulation of endopeptidase activity	serine-type endopeptidase inhibitor activity	0.000100259	267.005	155.664	230.396	169.029	194.945	203.408	171.222	218.15	149.97	160.195	148.883	169.684	1.19874	0.198448	0.261523	0.702354
O08807	Prdx4	Mus musculus	Peroxiredoxin-4	cytoplasm,cytosol,endoplasmic reticulum,extracellular space,mitochondrion,smooth endoplasmic reticulum	cell redox homeostasis,extracellular matrix organization,male gonad development,negative regulation of male germ cell proliferation,oxidation-reduction process,peptidyl-proline hydroxylation to 4-hydroxy-L-proline,protein maturation by protein folding,reactive oxygen species metabolic process,response to oxidative stress,spermatogenesis	thioredoxin peroxidase activity	2.02641e-08	350.251	317.735	282.679	325.15	344.928	324.149	364.368	332.552	304.167	348.159	261.595	322.168	1.00615	0.92958	0.00884139	0.0317131
O08808	Diaph1	Mus musculus	Protein diaphanous homolog 1	brush border,cytoplasm,microtubule organizing center,mitotic spindle,neuron projection,nucleus,ruffle membrane	actin cytoskeleton organization,actin filament polymerization,brain development,cellular response to histamine,cytoskeleton organization,neuron projection development,positive regulation of cell migration,protein localization to microtubule,regulation of cell shape,regulation of cytoskeleton organization,regulation of microtubule-based process,regulation of release of sequestered calcium ion into…	actin binding,identical protein binding,ion channel binding,profilin binding,Rho GTPase binding	3.92327e-14	303.38	300.073	338.563	295.804	330.099	313.584	341.673	368.623	333.765	376.428	308.015	345.701	0.907096	0.065813	-0.140672	1.18169
O08810	Eftud2	Mus musculus	116 kDa U5 small nuclear ribonucleoprotein component	Cajal body,catalytic step 2 spliceosome,cytosol,intracellular membrane-bounded organelle,nuclear speck,nucleoplasm,nucleus,ribonucleoprotein complex,U2-type catalytic step 2 spliceosome,U2-type precatalytic spliceosome,U4/U6 x U5 tri-snRNP complex	mRNA splicing, via spliceosome	GTPase activity,GTP binding,U5 snRNA binding	1.01048e-17	760.667	794.825	788.598	792.113	788.824	785.005	835.663	824.264	722.294	819.902	831.512	806.727	0.973075	0.355859	-0.0393775	0.448722
O08842	Gfra2	Mus musculus	GDNF family receptor alpha-2	anchored component of membrane,external side of plasma membrane,receptor complex	negative regulation of protein autophosphorylation,nervous system development,positive regulation of peptidyl-serine phosphorylation of STAT protein,transmembrane receptor protein tyrosine kinase signaling pathway	glial cell-derived neurotrophic factor receptor activity,signaling receptor activity	4.66807e-09	90.3213	46.7375	78.806	36.7552	47.8845	60.1009	64.9764	58.5354	84.8258	63.3933	65.9089	67.528	0.890015	0.528559	-0.168098	0.276907
O08848	RO60	Mus musculus	60 kDa SS-A/Ro ribonucleoprotein	cytoplasm,cytosol,nucleoplasm,nucleus,ribonucleoprotein complex	cellular response to interferon-alpha,cilium morphogenesis,immune system development,regulation of gene expression,response to UV,smoothened signaling pathway	metal ion binding,misfolded RNA binding,RNA binding,U2 snRNA binding	3.66071e-11	515.599	463.734	508.693	553.451	477.878	503.871	519.413	533.372	469.434	523.851	445.273	498.269	1.01124	0.816209	0.0161308	0.0881988
O08863;Q62210	Birc3;Birc2	Mus musculus	Baculoviral IAP repeat-containing protein 3;Baculoviral IAP repeat-containing protein 2	cytoplasm,cytosol,membrane raft,nucleoplasm,nucleus,macromolecular complex;CD40 receptor complex,cytoplasm,cytoplasmic side of plasma membrane,membrane raft,nucleus,macromolecular complex,XY body	cellular response to tumor necrosis factor,inhibition of cysteine-type endopeptidase activity involved in apoptotic process,necroptotic process,negative regulation of cysteine-type endopeptidase activity involved in apoptotic process,negative regulation of necroptotic process,negative regulation of phosphorylation,negative regulation of reactive oxygen species metabolic process,positive regulatio…	cysteine-type endopeptidase inhibitor activity involved in apoptotic process,metal ion binding,macromolecular complex binding,transferase activity,ubiquitin protein ligase activity,ubiquitin-protein transferase activity;chaperone binding,cysteine-type endopeptidase inhibitor activity involved in apoptotic process,FBXO family protein binding,identical protein binding,macromolecular complex binding…	0.00206382	82.3139	67.4732	NaN	NaN	72.0115	73.9329	85.7932	77.1632	68.801	58.9394	51.0492	68.3492	1.08169	0.552344	0.113292	0.257791
O08908	Pik3r2	Mus musculus	Phosphatidylinositol 3-kinase regulatory subunit beta	focal adhesion,nucleus,phosphatidylinositol 3-kinase complex	cellular glucose homeostasis,cellular response to insulin stimulus,insulin receptor signaling pathway,negative regulation of cell migration involved in sprouting angiogenesis,negative regulation of MAPK cascade,phosphatidylinositol 3-kinase signaling,phosphatidylinositol phosphorylation,positive regulation of cell adhesion,positive regulation of protein import into nucleus,positive regulation of …	1-phosphatidylinositol-3-kinase regulator activity,phosphatidylinositol 3-kinase regulatory subunit binding,phosphotyrosine binding,protein heterodimerization activity,protein phosphatase binding,receptor tyrosine kinase binding,transcription factor binding	9.29633e-06	70.6439	58.6504	71.6102	69.4952	89.8263	72.0452	89.9072	74.9546	80.1086	95.21	68.0178	81.6396	0.882478	0.209658	-0.180368	0.678489
O08914	Faah	Mus musculus	Fatty-acid amide hydrolase 1	endoplasmic reticulum membrane,Golgi membrane,integral component of membrane,organelle membrane	fatty acid catabolic process,monoacylglycerol catabolic process	acylglycerol lipase activity,amidase activity,anandamide amidohydrolase activity,fatty acid amide hydrolase activity,hydrolase activity, acting on ester bonds,identical protein binding,lipid binding,oleamide hydrolase activity,phospholipid binding	7.59709e-08	670.75	632.804	574.585	463.272	481.12	564.506	428.275	533.24	547.603	619.072	676.114	560.861	1.0065	0.951843	0.00934637	0.0214348
O08915	Aip	Mus musculus	AH receptor-interacting protein	aryl hydrocarbon receptor complex,cytosol,membrane,plasma membrane	negative regulation of cyclic-nucleotide phosphodiesterase activity,protein maturation by protein folding,protein targeting to mitochondrion,regulation of protein kinase A signaling,xenobiotic metabolic process	aryl hydrocarbon receptor binding,GAF domain binding,peptidyl-prolyl cis-trans isomerase activity,transcription cofactor activity,unfolded protein binding	1.13539e-12	761.791	729.9	794.3	817.891	753.989	771.574	855.314	805.369	805.124	712.621	729.488	781.583	0.987194	0.752635	-0.018595	0.123416
O08917	Flot1	Mus musculus	Flotillin-1	adherens junction,basolateral plasma membrane,caveola,cell-cell contact zone,cell-cell junction,centriolar satellite,COP9 signalosome,cortical actin cytoskeleton,cytoplasmic vesicle,dopaminergic synapse,early endosome,endosome,external side of plasma membrane,flotillin complex,GABA-ergic synapse,glutamatergic synapse,lamellipodium,melanosome,membrane,membrane raft,microtubule organizing center,pl…	axon guidance,axonogenesis,cellular response to exogenous dsRNA,dsRNA transport,endocytosis,extracellular matrix disassembly,membrane raft assembly,plasma membrane raft assembly,positive regulation of cell adhesion molecule production,positive regulation of cell-cell adhesion mediated by cadherin,positive regulation of cell junction assembly,positive regulation of cytokine production,positive reg…	ionotropic glutamate receptor binding,protease binding	7.66311e-20	2978.75	1984.41	2476.92	2673.84	2040.59	2430.9	3284.52	2936.44	13065	5777.95	8280.76	6668.94	0.364511	0.053817	-1.45597	1.26908
O08919	Numbl	Mus musculus	Numb-like protein	cytoplasm	adherens junction organization,axonogenesis,cytokine-mediated signaling pathway,forebrain development,lateral ventricle development,nervous system development,neuroblast division in subventricular zone,neuroblast proliferation,positive regulation of dendrite morphogenesis,positive regulation of neurogenesis,protein metabolic process		4.9777e-15	2893.76	2763.66	2860.16	2937.26	2913.72	2873.71	2886.37	2644.41	2886.05	2755.13	2885.07	2811.41	1.02216	0.309728	0.0316233	0.50902
O08967	Cyth3	Mus musculus	Cytohesin-3	adherens junction,bicellular tight junction,cytoplasm,cytosol,extrinsic component of cytoplasmic side of plasma membrane,nucleoplasm,plasma membrane,ruffle	establishment of epithelial cell polarity,Golgi vesicle transport,positive regulation of cell adhesion,regulation of ARF protein signal transduction	ARF guanyl-nucleotide exchange factor activity,guanyl-nucleotide exchange factor activity,phosphatidylinositol-3,4,5-trisphosphate binding	1.64211e-09	518.336	355.574	376.455	357.436	285.316	378.623	299.96	381.831	386.917	402.008	335.262	361.196	1.04825	0.693562	0.0679821	0.158915
O08989	Mras	Mus musculus	Ras-related protein M-Ras	plasma membrane	cellular response to leukemia inhibitory factor,Ras protein signal transduction	GDP binding,GTPase activity,GTP binding,GTP-dependent protein binding	1.57528e-06	618.565	271.7	435.401	236.927	291.729	370.865	257.478	333.998	501.771	436.191	391.319	384.151	0.965412	0.875402	-0.0507829	0.0577927
O08992	Sdcbp	Mus musculus	Syntenin-1	adherens junction,cytoplasm,cytoskeleton,cytosol,endoplasmic reticulum membrane,extracellular exosome,focal adhesion,interleukin-5 receptor complex,melanosome,membrane raft,nuclear membrane,nucleoplasm,plasma membrane,synapse	actin cytoskeleton organization,chemical synaptic transmission,negative regulation of proteasomal ubiquitin-dependent protein catabolic process,negative regulation of receptor internalization,positive regulation of cell growth,positive regulation of cell migration,positive regulation of cell proliferation,positive regulation of epithelial to mesenchymal transition,positive regulation of exosomal …	cell adhesion molecule binding,ephrin receptor binding,frizzled binding,growth factor binding,identical protein binding,interleukin-5 receptor binding,neurexin family protein binding,phosphatidylinositol-4,5-bisphosphate binding,macromolecular complex binding,protein C-terminus binding,protein heterodimerization activity,protein N-terminus binding,syndecan binding	3.36224e-10	555.065	511.712	666.509	609.451	576.237	583.795	509.804	621.442	594.672	588.264	576.396	578.116	1.00982	0.86362	0.0141033	0.0636772
O08997	Atox1	Mus musculus	Copper transport protein ATOX1	cytosol	cellular copper ion homeostasis,copper ion export,copper ion transport,negative regulation of apoptotic process,response to oxidative stress	ATPase binding,copper chaperone activity,copper-dependent protein binding,copper ion binding	2.84422e-12	5488.97	3621.86	4349.84	4259.3	4172.91	4378.58	4639.29	5046.4	4260.98	3339.13	3727.15	4202.59	1.04188	0.694733	0.0591828	0.158182
O09012	Pex5	Mus musculus	Peroxisomal targeting signal 1 receptor	cytoplasm,cytosol,Golgi apparatus,membrane,mitochondrion,peroxisomal matrix,peroxisomal membrane,peroxisome,macromolecular complex	cell development,cellular lipid metabolic process,cerebral cortex cell migration,cerebral cortex neuron differentiation,endoplasmic reticulum organization,fatty acid beta-oxidation,mitochondrial membrane organization,mitochondrion organization,negative regulation of protein complex assembly,neuromuscular process,neuron migration,peroxisome organization,positive regulation of multicellular organis…	enzyme binding,peroxisome matrix targeting signal-1 binding,peroxisome membrane targeting sequence binding,peroxisome targeting sequence binding,protein C-terminus binding,protein N-terminus binding,protein sequestering activity,small GTPase binding	8.21696e-09	251.956	350.186	339.935	342.54	410.272	338.978	319.854	313.614	264.04	333.309	250.031	296.169	1.14454	0.193644	0.194768	0.712995
O09044	Snap23	Mus musculus	Synaptosomal-associated protein 23	adherens junction,azurophil granule,cytoplasm,cytoplasmic vesicle,GABA-ergic synapse,glutamatergic synapse,mast cell granule,mitochondrion,neuron projection,nucleoplasm,plasma membrane,postsynapse,presynapse,SNARE complex,specific granule	exocytic insertion of neurotransmitter receptor to postsynaptic membrane,exocytosis,histamine secretion by mast cell,membrane fusion,macromolecular complex assembly,protein transport,regulation of exocytosis,synaptic vesicle fusion to presynaptic active zone membrane,synaptic vesicle priming,vesicle fusion,vesicle-mediated transport,vesicle-mediated transport in synapse	SNAP receptor activity,syntaxin binding	0.000153197	5.88446	51.0028	8.68347	6.48429	11.6349	16.738	NaN	23.8136	12.9791	4.30458	19.0688	15.0415	1.11278	0.875696	0.154173	0.0576466
O09061	Psmb1	Mus musculus	Proteasome subunit beta type-1	cytoplasm,cytosol,nucleoplasm,nucleus,proteasome complex,proteasome core complex,proteasome core complex, beta-subunit complex	proteasomal protein catabolic process,proteasomal ubiquitin-independent protein catabolic process,proteasome-mediated ubiquitin-dependent protein catabolic process	endopeptidase activity,threonine-type endopeptidase activity	1.08858e-12	1857.62	1793.6	1785.88	1930.31	1875.76	1848.64	1874.16	1767.67	1852.44	1916.31	1930.92	1868.3	0.989476	0.631433	-0.0152636	0.199672
O09106	Hdac1	Mus musculus	Histone deacetylase 1	chromatin,cytoplasm,cytosol,heterochromatin,histone deacetylase complex,neuronal cell body,neuron projection,nuclear chromatin,nucleoplasm,nucleus,NuRD complex,perinuclear region of cytoplasm,macromolecular complex,Sin3 complex,transcription factor complex,transcriptional repressor complex	cellular response to oxidative stress,cellular response to tumor necrosis factor,chromatin organization,circadian regulation of gene expression,circadian rhythm,methylation-dependent chromatin silencing,embryonic digit morphogenesis,endoderm development,epidermal cell differentiation,eyelid development in camera-type eye,fungiform papilla formation,hair follicle placode formation,hippocampus deve…	activating transcription factor binding,chromatin binding,core promoter sequence-specific DNA binding,deacetylase activity,DNA binding,E-box binding,enzyme binding,histone deacetylase activity,histone deacetylase binding,Krueppel-associated box domain binding,NAD-dependent histone deacetylase activity (H3-K14 specific),NF-kappaB binding,p53 binding,promoter-specific chromatin binding,macromolecul…	9.41681e-10	94.0397	121.385	145.667	95.6249	133.551	118.054	106.643	85.3581	107.739	78.2489	114.454	98.4886	1.19865	0.153688	0.261412	0.81336
O09111	Ndufb11	Mus musculus	NADH dehydrogenase [ubiquinone] 1 beta subcomplex subunit 11, mitochondrial	integral component of membrane,mitochondrial respiratory chain complex I,mitochondrion	mitochondrial respiratory chain complex I assembly,oxidation-reduction process		1.85311e-15	3901.45	3643.68	3561.02	3180.08	3242.67	3505.78	2789.6	3517.93	3355.58	3128.48	3178.36	3193.99	1.09762	0.12272	0.134377	0.911085
O09114	Ptgds	Mus musculus	Prostaglandin-H2 D-isomerase	extracellular region,extracellular space,Golgi apparatus,mast cell granule,nuclear membrane,perinuclear region of cytoplasm,rough endoplasmic reticulum	mast cell degranulation,negative regulation of male germ cell proliferation,prostaglandin biosynthetic process,regulation of circadian sleep/wake cycle, sleep,response to glucocorticoid	fatty acid binding,prostaglandin-D synthase activity,retinoid binding	1.50863e-07	2540.07	2162.8	2517.08	2502.08	2234.1	2391.22	2153.34	2662.77	2157.01	2530.29	2349.57	2370.6	1.0087	0.876628	0.0125001	0.0571848
O09117	Sypl1	Mus musculus	Synaptophysin-like protein 1	integral component of synaptic vesicle membrane,melanosome,membrane,secretory granule,synaptic vesicle membrane		syntaxin-1 binding	6.15935e-06	336.944	648.223	470.354	205.968	280.763	388.45	374.431	141.626	186.382	221.12	157.615	216.235	1.79643	0.087572	0.845131	1.05763
O09131	Gsto1	Mus musculus	Glutathione S-transferase omega-1	axon,basement membrane,cell body,cytoplasm,cytosol,myelin sheath,nuclear membrane,nucleoplasm	cellular response to arsenic-containing substance,L-ascorbic acid biosynthetic process,L-ascorbic acid metabolic process,negative regulation of ryanodine-sensitive calcium-release channel activity,oxidation-reduction process,positive regulation of ryanodine-sensitive calcium-release channel activity,regulation of release of sequestered calcium ion into cytosol by sarcoplasmic reticulum,xenobiotic…	glutathione dehydrogenase (ascorbate) activity,glutathione transferase activity,methylarsonate reductase activity,oxidoreductase activity	5.36059e-11	2935.19	2586.8	2766.69	3018.94	2914.49	2844.42	2806.79	3260.62	2723.19	2872.62	2898.83	2912.41	0.976656	0.585273	-0.0340769	0.232641
O09159	Man2b1	Mus musculus	Lysosomal alpha-mannosidase	extracellular space,lysosome,vacuolar membrane	cellular protein modification process,learning or memory,mannose metabolic process	alpha-mannosidase activity,mannose binding,metal ion binding	2.33496e-11	184.276	118.638	109.188	135.952	104.63	130.537	133.465	114.512	140.641	134.034	138.5	132.23	0.987191	0.91396	-0.0185993	0.0390727
O09161	Casq2	Mus musculus	Calsequestrin-2	cytoplasm,junctional membrane complex,sarcoplasmic reticulum,sarcoplasmic reticulum lumen,Z disc	cardiac muscle contraction,cellular response to caffeine,negative regulation of potassium ion transmembrane transporter activity,negative regulation of potassium ion transport,negative regulation of ryanodine-sensitive calcium-release channel activity,protein polymerization,regulation of cardiac muscle cell contraction,regulation of cardiac muscle contraction by regulation of the release of seque…	calcium-dependent protein binding,calcium ion binding,protein homodimerization activity,protein kinase C binding	8.24576e-09	536.27	383.015	253.055	253.098	334.941	352.076	277.401	314.482	280.015	254.995	254.679	276.314	1.27419	0.194235	0.349575	0.711674
O09167	Rpl21	Mus musculus	60S ribosomal protein L21	cytosolic large ribosomal subunit,endoplasmic reticulum,ribosome	translation	structural constituent of ribosome	3.6722e-12	1514.75	1414.72	1553.02	1986.58	1788.64	1651.54	1525.88	2080.62	1376.2	1500.75	1476.59	1592.01	1.0374	0.723288	0.0529657	0.140689
O09172	Gclm	Mus musculus	Glutamate--cysteine ligase regulatory subunit	glutamate-cysteine ligase complex	aging,apoptotic mitochondrial changes,cellular response to fibroblast growth factor stimulus,cellular response to follicle-stimulating hormone stimulus,cellular response to glucose stimulus,cellular response to hepatocyte growth factor stimulus,cellular response to leukemia inhibitory factor,cellular response to thyroxine stimulus,cysteine metabolic process,glutamate metabolic process,glutathione…	enzyme regulator activity,glutamate-cysteine ligase activity,glutamate-cysteine ligase catalytic subunit binding,macromolecular complex binding	2.39953e-13	732.25	568.779	686.759	715.912	634.29	667.598	664.132	756.285	735.912	749.227	729.303	726.972	0.918327	0.119071	-0.12292	0.924195
O09174	Amacr	Mus musculus	Alpha-methylacyl-CoA racemase	cytoplasm,intracellular membrane-bounded organelle,mitochondrion,peroxisome,plasma membrane	bile acid biosynthetic process,bile acid metabolic process,fatty acid metabolic process,isoprenoid catabolic process	alpha-methylacyl-CoA racemase activity,CoA-transferase activity,receptor binding	2.38277e-15	188.48	160.989	149.561	153.374	141.534	158.788	174.22	180.107	158.741	163.726	116.538	158.666	1.00076	0.9932	0.0011016	0.00296309
O35066	Kif3c	Mus musculus	Kinesin-like protein KIF3C	axon,cytosol,dendrite,growth cone,kinesin complex,membrane,microtubule,microtubule plus-end,neuronal cell body,neuronal ribonucleoprotein granule,synaptic vesicle	microtubule-based movement,organelle transport along microtubule,positive regulation of neuron projection development	ATPase activity,ATP binding,kinesin binding,microtubule binding,microtubule motor activity	1.07927e-05	95.7439	80.8709	79.4529	80.2695	59.9884	79.2651	54.9257	71.1845	83.3147	92.7998	89.2204	78.289	1.01247	0.915744	0.0178762	0.0382259
O35075	Vps26c	Mus musculus	Vacuolar protein sorting-associated protein 26C	endosome	endocytic recycling,intracellular protein transport,retrograde transport, endosome to plasma membrane		1.10634e-08	148.13	125.079	107.061	86.8175	71.0617	107.63	121.263	127.858	135.141	157.313	132.433	134.802	0.798431	0.106304	-0.32476	0.97345
O35083	Agpat1	Mus musculus	1-acyl-sn-glycerol-3-phosphate acyltransferase alpha	endoplasmic reticulum,endoplasmic reticulum membrane,integral component of membrane	CDP-diacylglycerol biosynthetic process,phosphatidic acid biosynthetic process,positive regulation of cytokine production	1-acylglycerol-3-phosphate O-acyltransferase activity	1.51932e-11	368.619	286.144	302.99	148.195	191.836	259.557	133.1	169.152	233.123	360.778	300.762	239.383	1.08428	0.73499	0.116732	0.133718
O35089	Cnih2	Mus musculus	Protein cornichon homolog 2	AMPA glutamate receptor complex,dendrite,dendritic shaft,dendritic spine,endoplasmic reticulum membrane,glutamatergic synapse,integral component of postsynaptic density membrane,postsynaptic density,postsynaptic membrane	localization within membrane,negative regulation of anterograde synaptic vesicle transport,negative regulation of receptor localization to synapse,regulation of alpha-amino-3-hydroxy-5-methyl-4-isoxazole propionate selective glutamate receptor activity,regulation of membrane potential,regulation of N-methyl-D-aspartate selective glutamate receptor activity,regulation of postsynaptic neurotransmit…	channel regulator activity	0.0019645	71.0336	57.1132	NaN	NaN	NaN	64.0734	39.0269	NaN	49.9054	NaN	41.1831	43.3718	1.47731	0.0543817	0.562968	1.26455
O35098	Dpysl4	Mus musculus	Dihydropyrimidinase-related protein 4	cytoplasm	neuron death,neuron projection guidance	filamin binding,hydrolase activity, acting on carbon-nitrogen (but not peptide) bonds,phosphoprotein binding	1.3576e-15	3940.14	3928.56	3843.82	3886.49	3784.51	3876.7	3926.7	3994.12	4217.33	4357.45	4395.46	4178.21	0.927838	0.0156239	-0.108055	1.80621
O35099	Map3k5	Mus musculus	Mitogen-activated protein kinase kinase kinase 5	cytoplasm,cytosol,external side of plasma membrane,IRE1-TRAF2-ASK1 complex,macromolecular complex,protein kinase complex	activation of MAPK activity,activation of MAPKK activity,cellular response to amino acid starvation,cellular response to hydrogen peroxide,cellular response to reactive nitrogen species,cellular response to tumor necrosis factor,endothelial cell apoptotic process,innate immune response,intrinsic apoptotic signaling pathway in response to endoplasmic reticulum stress,intrinsic apoptotic signaling …	ATP binding,identical protein binding,magnesium ion binding,MAP kinase kinase kinase activity,protein domain specific binding,protein homodimerization activity,protein kinase activity,protein kinase binding,protein phosphatase binding	4.06894e-09	243.573	230.546	258.724	235.281	245.598	242.745	221.625	249.165	263.459	246.262	253.845	246.871	0.983284	0.639259	-0.0243193	0.194323
O35114	Scarb2	Mus musculus	Lysosome membrane protein 2	endocytic vesicle membrane,integral component of membrane,lysosomal lumen,lysosomal membrane,plasma membrane	aminophospholipid transport,positive regulation of neuron projection development,protein targeting to lysosome,receptor-mediated endocytosis,regulation of cellular carbohydrate catabolic process,regulation of glucosylceramidase activity	cargo receptor activity,chaperone binding,cholesterol binding,enzyme binding,phosphatidylcholine binding,phosphatidylserine binding,protein homodimerization activity,scavenger receptor activity	9.34433e-08	172.532	399.163	267.639	116.696	157.632	222.733	146.993	173.052	259.881	276.766	183.104	207.959	1.07104	0.800764	0.0990121	0.0964954
O35126	Atn1	Mus musculus	Atrophin-1	cell junction,cell leading edge,cytoplasm,nuclear matrix,nucleoplasm,nucleus,perinuclear region of cytoplasm	cell migration,determination of adult lifespan,maintenance of cell polarity,male gonad development,multicellular organism growth,negative regulation of transcription from RNA polymerase II promoter,neuron apoptotic process,post-embryonic development,response to food,spermatogenesis,toxin metabolic process	DNA binding,JUN kinase binding,protein domain specific binding,RNA polymerase II transcription factor binding,toxin activity,transcription coactivator activity,transcription corepressor activity	0.000517185	137.132	197.726	62.0309	154.618	93.326	128.967	121.664	115.131	68.0245	118.111	93.7344	103.333	1.24807	0.348211	0.3197	0.458158
O35127	Grcc10	Mus musculus	Protein C10	cytoplasm,nuclear speck	camera-type eye morphogenesis,cognition,corpus callosum morphogenesis,post-embryonic development,psychomotor behavior,regulation of skeletal muscle contraction,third ventricle development		5.54517e-11	1260.24	829.708	1024.88	854.965	791.351	952.228	805.114	972.541	844.006	729.215	695.535	809.282	1.17663	0.188473	0.234664	0.72475
O35129	Phb2	Mus musculus	Prohibitin-2	axon,cell periphery,cell surface,cytoplasm,GABA-ergic synapse,glutamatergic synapse,inner mitochondrial membrane protein complex,mitochondrial inner membrane,mitochondrial outer membrane,mitochondrial prohibitin complex,mitochondrion,nuclear matrix,nucleus,plasma membrane,postsynaptic density,presynaptic active zone,macromolecular complex	activation of phospholipase C activity,activation of protein kinase C activity,antiviral innate immune response,B cell activation,CD40 signaling pathway,cell migration,cellular response to hypoxia,cellular response to retinoic acid,immunoglobulin production,induction by virus of host autophagy,mammary gland alveolus development,mammary gland branching involved in thelarche,mitochondrion organizat…	amide binding,identical protein binding,protein C-terminus binding,protein heterodimerization activity,protein homodimerization activity,protein N-terminus binding,sphingolipid binding	2.65741e-13	9344.46	9212.58	9855.3	9017.12	9438.27	9373.55	8381.11	9157.23	9345.95	9864.72	9490.81	9247.97	1.01358	0.668687	0.0194589	0.174777
O35130	Emg1	Mus musculus	Ribosomal RNA small subunit methyltransferase NEP1	nucleolus,nucleoplasm,small-subunit processome	blastocyst development,nucleologenesis,rRNA base methylation	identical protein binding,rRNA (pseudouridine) methyltransferase activity,rRNA binding	8.87586e-05	58.618	42.8508	41.2565	50.7234	NaN	48.3622	86.8975	32.7143	46.9299	45.5847	66.7429	55.7738	0.867112	0.533656	-0.20571	0.272738
O35136	Ncam2	Mus musculus	Neural cell adhesion molecule 2	anchored component of membrane,axon,integral component of membrane,neuron projection,nuclear body,plasma membrane	axonal fasciculation,cell adhesion,sensory perception of smell	identical protein binding	3.13988e-16	1119.93	1237.98	935.781	691.729	816.194	960.323	671.644	755.291	1074.63	1215.49	1110.4	965.49	0.994648	0.972494	-0.00774249	0.0121133
O35143	Atp5if1	Mus musculus	ATPase inhibitor, mitochondrial	cell surface,mitochondrion,macromolecular complex	erythrocyte differentiation,heme biosynthetic process,mitochondrial depolarization,negative regulation of ATPase activity,negative regulation of endothelial cell proliferation,negative regulation of hydrolase activity,positive regulation of mitophagy in response to mitochondrial depolarization,positive regulation of mitochondrial outer membrane permeabilization involved in apoptotic signaling pat…	angiostatin binding,ATPase binding,ATPase inhibitor activity,calmodulin binding,enzyme binding,identical protein binding,mitochondrial proton-transporting ATP synthase complex binding	1.30898e-08	4943.78	3971.05	4416.74	4424.78	4097.09	4370.69	4175.67	4549.53	4100.6	3827.71	4023.89	4135.48	1.05688	0.286769	0.0798058	0.542468
O35166	Gosr2	Mus musculus	Golgi SNAP receptor complex member 2	cytosol,endoplasmic reticulum membrane,ER to Golgi transport vesicle membrane,Golgi apparatus,Golgi membrane,integral component of membrane,late endosome membrane,SNARE complex	ER to Golgi vesicle-mediated transport,Golgi to vacuole transport,intra-Golgi vesicle-mediated transport,protein targeting to vacuole,retrograde transport, endosome to Golgi,vesicle fusion with Golgi apparatus,vesicle-mediated transport	SNAP receptor activity,SNARE binding	0.000183811	NaN	133.06	88.4695	119.016	NaN	113.515	NaN	75.1214	82.769	NaN	NaN	78.9452	1.4379	0.138474	0.523962	0.858631
O35188	Cx3cl1	Mus musculus	Fractalkine	cell body,cell projection,cell surface,cytoplasm,extracellular region,extracellular space,integral component of membrane,membrane,neuronal cell body,neuron projection,perinuclear region of cytoplasm,plasma membrane,postsynapse	angiogenesis involved in wound healing,autocrine signaling,cell adhesion,cell-cell adhesion,cell chemotaxis,cellular response to interferon-gamma,cellular response to interleukin-1,cellular response to tumor necrosis factor,chemokine-mediated signaling pathway,chemotaxis,cytokine-mediated signaling pathway,eosinophil chemotaxis,G-protein coupled receptor signaling pathway,inflammatory response,in…	CCR chemokine receptor binding,chemoattractant activity,chemokine activity,CX3C chemokine receptor binding,CXCR1 chemokine receptor binding,integrin binding	8.7662e-10	135.511	93.293	90.322	83.1681	122.363	104.931	86.0139	75.0415	97.5064	67.3083	120.886	89.3512	1.17437	0.292521	0.231888	0.533842
O35206	Col15a1	Mus musculus	Collagen alpha-1(XV) chain	basement membrane,collagen-containing extracellular matrix,collagen trimer,extracellular matrix,extracellular space	angiogenesis,cell adhesion,endothelial cell morphogenesis,extracellular matrix organization	extracellular matrix structural constituent	4.5818e-13	294.877	334.407	439.849	443.334	280.931	358.68	358.33	437.397	431.549	769.81	496.597	498.737	0.719177	0.115563	-0.475582	0.937181
O35207;Q9CPY4	Cdk2ap1;Cdk2ap2	Mus musculus	Cyclin-dependent kinase 2-associated protein 1;Cyclin-dependent kinase 2-associated protein 2	cytosol,nucleoplasm,nucleus,perinuclear region of cytoplasm;cytoplasm,microtubule,nucleus	cell cycle,face morphogenesis,in utero embryonic development,positive regulation of protein phosphorylation;negative regulation of G1/S transition of mitotic cell cycle,regulation of microtubule cytoskeleton organization,regulation of stem cell division	DNA polymerase binding;	6.93363e-06	104.931	147.132	126.868	127.296	121.803	125.606	73.1187	154.885	120.643	91.5667	126.149	113.273	1.10888	0.455415	0.149109	0.341592
O35215	Ddt	Mus musculus	D-dopachrome decarboxylase	cytoplasm,extracellular space	melanin biosynthetic process,negative regulation of macrophage chemotaxis,positive regulation of ERK1 and ERK2 cascade,positive regulation of inflammatory response,positive regulation of tumor necrosis factor production	cytokine receptor binding,D-dopachrome decarboxylase activity,phenylpyruvate tautomerase activity,protease binding	2.2911e-12	11610.8	8919.04	10126.9	11494.3	10250.4	10480.3	10324	10429.2	9350.37	8731.64	9130.94	9593.25	1.09246	0.176737	0.127586	0.752672
O35218	Cpsf2	Mus musculus	Cleavage and polyadenylation specificity factor subunit 2	mRNA cleavage and polyadenylation specificity factor complex	mRNA 3'-end processing by stem-loop binding and cleavage,mRNA polyadenylation,pre-mRNA cleavage required for polyadenylation	RNA binding	7.7216e-06	72.2866	136.871	85.4803	103.752	47.0656	89.0911	98.1643	112.244	131.406	104.117	85.8693	106.36	0.837637	0.336813	-0.255604	0.472612
O35226	Psmd4	Mus musculus	26S proteasome non-ATPase regulatory subunit 4	cytoplasm,cytosol,nucleoplasm,nucleus,proteasome accessory complex,proteasome complex,proteasome regulatory particle, base subcomplex	proteasome assembly,proteasome-mediated ubiquitin-dependent protein catabolic process	identical protein binding,polyubiquitin binding,transcription factor binding	1.59916e-11	5992.7	4943.11	5323.68	5661.76	5284.56	5441.16	5387.01	5760.21	5464.41	5408.59	5488.6	5501.76	0.988985	0.75912	-0.0159795	0.119689
O35239	Ptpn9	Mus musculus	Tyrosine-protein phosphatase non-receptor type 9	cytoplasm,neuron projection terminus	negative regulation of neuron projection development,peptidyl-tyrosine dephosphorylation,positive regulation of protein localization to plasma membrane,protein dephosphorylation	protein tyrosine phosphatase activity	2.3855e-11	539.621	627.992	476.862	420.834	552.586	523.579	496.281	542.133	541.377	594.823	503.762	535.675	0.977419	0.766078	-0.0329509	0.115727
O35250	Exoc7	Mus musculus	Exocyst complex component 7	centriolar satellite,cytosol,exocyst,Flemming body,growth cone membrane,microtubule organizing center,plasma membrane	exocytosis,protein transport,regulation of entry of bacterium into host cell		1.52543e-13	1465.87	1383.82	1486.36	1443.79	1479.09	1451.79	1540.51	1503.76	1391.16	1467.45	1396.13	1459.8	0.99451	0.823166	-0.00794277	0.0845128
O35286	Dhx15	Mus musculus	Pre-mRNA-splicing factor ATP-dependent RNA helicase DHX15	nuclear speck,nucleolus,spliceosomal complex,U12-type spliceosomal complex,U2-type post-mRNA release spliceosomal complex	mRNA processing,response to alkaloid,response to toxic substance,RNA splicing	ATP binding,double-stranded RNA binding,RNA binding,RNA helicase activity	4.75023e-12	1013.3	1032.99	1014.48	1059.14	988.339	1021.65	1044.79	1033.2	1055.8	1052.24	1041.56	1045.52	0.977171	0.0907871	-0.0333176	1.04198
O35295	Purb	Mus musculus	Transcriptional activator protein Pur-beta	nucleoplasm,nucleus	cell differentiation,cell proliferation,DNA unwinding involved in DNA replication,negative regulation of transcription, DNA-templated,negative regulation of transcription from RNA polymerase II promoter	transcription factor activity, sequence-specific DNA binding,transcriptional repressor activity, RNA polymerase II transcription regulatory region sequence-specific binding,double-stranded DNA binding,double-stranded telomeric DNA binding,mRNA binding,purine-rich negative regulatory element binding,RNA binding,RNA polymerase II regulatory region sequence-specific DNA binding,sequence-specific DNA…	2.56512e-18	2357.83	2299.69	2570.3	2495.78	2452.64	2435.25	2460.18	2349.09	2483.39	2569.75	2580.92	2488.67	0.978535	0.42828	-0.0313054	0.368272
O35326	Srsf5	Mus musculus	Serine/arginine-rich splicing factor 5	nuclear speck,nucleus	mRNA cis splicing, via spliceosome,positive regulation of RNA splicing,regulation of alternative mRNA splicing, via spliceosome,response to insulin,response to wounding	mRNA binding,protein kinase B binding,RNA binding,RS domain binding	6.44463e-09	487.634	390.873	417.718	432.447	522.975	450.329	456.238	465.666	464.7	547.105	442.949	475.332	0.9474	0.433155	-0.077954	0.363357
O35343	Kpna4	Mus musculus	Importin subunit alpha-3	cytoplasm,host cell nucleus,nuclear membrane,nucleoplasm,nucleus	NLS-bearing protein import into nucleus,protein import into nucleus,response to hydrogen peroxide	nuclear import signal receptor activity,nuclear localization sequence binding	1.31577e-22	467.176	493.187	470.833	524.183	477.88	486.652	517.332	469.023	335.274	452.119	326.352	420.02	1.15864	0.129098	0.212431	0.889081
O35344	Kpna3	Mus musculus	Importin subunit alpha-4	cytoplasm,host cell nucleus,nucleoplasm,nucleus	NLS-bearing protein import into nucleus	nuclear import signal receptor activity,nuclear localization sequence binding,protein C-terminus binding	6.15761e-10	587.425	489.501	479.703	507.157	508.826	514.522	514.413	526.044	416.659	395.673	468.197	464.197	1.10841	0.155129	0.148497	0.809307
O35345	Kpna6	Mus musculus	Importin subunit alpha-7	cytoplasm,host cell nucleus,nucleoplasm,nucleus	entry of viral genome into host nucleus through nuclear pore complex via importin,maternal process involved in female pregnancy,evasion or tolerance of host defense response,NLS-bearing protein import into nucleus,positive regulation of cytokine production involved in inflammatory response,positive regulation of transcription from RNA polymerase II promoter,positive regulation of viral life cycle…	nuclear import signal receptor activity,nuclear localization sequence binding	2.00571e-15	690.926	675.449	733.697	646.582	680.158	685.362	700.301	739.587	663.521	666.353	538.858	661.724	1.03572	0.535537	0.0506376	0.271211
O35350	Capn1	Mus musculus	Calpain-1 catalytic subunit	cytoplasm,cytosol,lysosome,membrane,mitochondrion,plasma membrane	cellular response to hydrogen peroxide,mammary gland involution,negative regulation of actin filament polymerization,negative regulation of NIK/NF-kappaB signaling,positive regulation of cardiac muscle cell apoptotic process,positive regulation of leukocyte tethering or rolling,positive regulation of vascular permeability,protein autoprocessing,proteolysis,receptor catabolic process,regulation of…	calcium-dependent cysteine-type endopeptidase activity,calcium ion binding,cytoskeletal protein binding,enzyme binding	1.15999e-08	390.398	400.993	409.07	386.066	437.431	404.792	402.688	329.537	359.455	335.165	342.718	353.913	1.14376	0.0131	0.193786	1.88273
O35375	Nrp2	Mus musculus	Neuropilin-2	axon,glutamatergic synapse,integral component of membrane,plasma membrane	angiogenesis,axon extension involved in axon guidance,axon guidance,cellular response to leukemia inhibitory factor,dorsal root ganglion morphogenesis,facial nerve structural organization,facioacoustic ganglion development,gonadotrophin-releasing hormone neuronal migration to the hypothalamus,heart development,negative chemotaxis,nerve development,neural crest cell migration,neural crest cell mig…	heparin binding,identical protein binding,metal ion binding,semaphorin receptor activity,vascular endothelial growth factor-activated receptor activity	2.72268e-06	135.243	146.517	113.209	131.878	117.683	128.906	110.972	105.077	88.8122	132.695	108.484	109.208	1.18037	0.0663896	0.239242	1.1779
O35381	Anp32a	Mus musculus	Acidic leucine-rich nuclear phosphoprotein 32 family member A	cytoplasm,endoplasmic reticulum,nuclear matrix,nucleus,perinuclear region of cytoplasm	nucleocytoplasmic transport,regulation of apoptotic process	histone binding	1.47981e-09	1093.15	1309.44	1230.29	1492.08	1408.54	1306.7	1431.46	1270.15	984.389	856.109	860.878	1080.6	1.20924	0.131874	0.274101	0.879841
O35382	Exoc4	Mus musculus	Exocyst complex component 4	cell leading edge,cytoplasm,dendritic shaft,exocyst,Flemming body,growth cone,growth cone membrane,microvillus,myelin sheath,myelin sheath abaxonal region,neuronal cell body,neuron projection,plasma membrane,postsynaptic density,macromolecular complex,synapse,synaptic vesicle	chemical synaptic transmission,establishment of cell polarity,exocytosis,Golgi to plasma membrane transport,Golgi to transport vesicle transport,membrane biogenesis,oligodendrocyte differentiation,paraxial mesoderm formation,positive regulation of calcium-mediated signaling,protein targeting to membrane,regulation of protein transport,vesicle docking involved in exocytosis,vesicle tethering invol…	PDZ domain binding,macromolecular complex binding,protein N-terminus binding,Ral GTPase binding	6.07587e-15	388.454	478.341	442.083	384.146	360.043	410.613	368.076	388.581	455.351	510.025	418.384	428.083	0.95919	0.612977	-0.0601112	0.212556
O35386	Phyh	Mus musculus	Phytanoyl-CoA dioxygenase, peroxisomal	9+0 non-motile cilium,mitochondrion,peroxisomal matrix,peroxisome	2-oxobutyrate catabolic process,2-oxoglutarate metabolic process,fatty acid alpha-oxidation,isoprenoid metabolic process,methyl-branched fatty acid metabolic process	carboxylic acid binding,catalytic activity,ferrous iron binding,L-ascorbic acid binding,phytanoyl-CoA dioxygenase activity	0.000126745	144.685	159.034	95.9764	148.175	102.754	130.125	147.434	130.067	120.011	96.4123	127.255	124.236	1.0474	0.70976	0.0668159	0.148889
O35387	Hax1	Mus musculus	HCLS1-associated protein X-1	actin cytoskeleton,apical plasma membrane,cell cortex,clathrin-coated vesicle,cytoplasm,endoplasmic reticulum,intracellular membrane-bounded organelle,lamellipodium,mitochondrial intermembrane space,mitochondrial outer membrane,mitochondrion,nuclear membrane,cytoplasmic mRNA processing body,sarcoplasmic reticulum,transcription factor complex	cell surface receptor signaling pathway,cellular response to cytokine stimulus,negative regulation of apoptotic process,positive regulation of actin cytoskeleton reorganization,positive regulation of granulocyte differentiation,positive regulation of peptidyl-serine phosphorylation,positive regulation of peptidyl-tyrosine phosphorylation,positive regulation of phosphatidylinositol 3-kinase signal…	interleukin-1 binding,protein domain specific binding,protein N-terminus binding	2.11312e-14	204.986	145.607	207.774	175.063	170.461	180.778	158.88	137.14	188.505	198.265	217.935	180.145	1.00352	0.973481	0.00506262	0.0116724
O35393	Efnb3	Mus musculus	Ephrin-B3	glutamatergic synapse,hippocampal mossy fiber to CA3 synapse,integral component of postsynaptic density membrane,integral component of presynaptic membrane,plasma membrane	adult walking behavior,axon choice point recognition,axon guidance,ephrin receptor signaling pathway,negative regulation of axonogenesis,T cell costimulation,trans-synaptic signaling by trans-synaptic complex, modulating synaptic transmission	ephrin receptor binding	4.63137e-14	1012.28	964.553	999.43	931.575	1026.96	986.96	981.009	1011.77	1065.69	950.297	900.038	981.76	1.0053	0.878134	0.00762153	0.0564391
O35405	Pld3	Mus musculus	5'-3' exonuclease PLD3	early endosome membrane,endoplasmic reticulum membrane,Golgi membrane,integral component of membrane,late endosome membrane,lysosomal lumen,lysosomal membrane	inflammatory response,innate immune response,myotube differentiation,regulation of cytokine production involved in inflammatory response	phospholipase D activity,single-stranded DNA 5'-3' exodeoxyribonuclease activity	5.7552e-12	7814.38	6816.49	7252.33	7905.2	7416.32	7440.94	7026.14	7630.78	7275.86	8621.84	8102.23	7731.37	0.962435	0.428587	-0.055239	0.367961
O35409	Folh1	Mus musculus	Glutamate carboxypeptidase 2	cell surface,integral component of membrane,integral component of plasma membrane,plasma membrane	C-terminal protein deglutamylation,folic acid-containing compound metabolic process,positive regulation of apoptotic process,proteolysis	Ac-Asp-Glu binding,carboxypeptidase activity,dipeptidase activity,metal ion binding,metallocarboxypeptidase activity,peptidase activity,tetrahydrofolyl-poly(glutamate) polymer binding	1.31647e-11	1706.1	2149.9	1714.58	1706.75	2024.44	1860.35	1841.47	1678.32	1824.74	2054.88	1848.82	1849.65	1.00579	0.926281	0.0083283	0.0332573
O35417	Pdyn	Mus musculus	Proenkephalin-B	axon terminus,cytoplasm,dendrite,extracellular region,neuronal cell body,neuronal dense core vesicle lumen,plasma membrane,synaptic vesicle	chemical synaptic transmission,neuropeptide signaling pathway,sensory perception	neuropeptide hormone activity,opioid peptide activity,opioid receptor binding	1.10185e-09	400.008	225.964	430.434	307.963	379.14	348.702	230.878	164.053	207.109	236.65	209.403	209.619	1.66351	0.00721415	0.734227	2.14181
O35425	Bok	Mus musculus	Bcl-2-related ovarian killer protein	cis-Golgi network membrane,cytoplasm,early endosome membrane,endoplasmic reticulum,endoplasmic reticulum membrane,Golgi apparatus,integral component of membrane,membrane,mitochondrial inner membrane,mitochondrial membrane,mitochondrial outer membrane,mitochondrion,nuclear outer membrane,nucleus,recycling endosome membrane,trans-Golgi network membrane	activation of cysteine-type endopeptidase activity involved in apoptotic process,activation of cysteine-type endopeptidase activity involved in apoptotic process by cytochrome c,apoptotic process,brain development,cellular component disassembly involved in execution phase of apoptosis,extrinsic apoptotic signaling pathway in absence of ligand,intrinsic apoptotic signaling pathway by p53 class med…	BH domain binding,macromolecular complex binding,protein dimerization activity,protein heterodimerization activity,protein homodimerization activity,receptor binding,ubiquitin protein ligase binding	0.000101343	167.75	84.6618	146.815	NaN	169.231	142.115	NaN	183.897	168.441	NaN	203.771	185.37	0.766656	0.143725	-0.383349	0.842468
O35435	Dhodh	Mus musculus	Dihydroorotate dehydrogenase (quinone), mitochondrial	cytosol,integral component of membrane,mitochondrial inner membrane,mitochondrion,neuronal cell body,nucleoplasm	'de novo' pyrimidine nucleobase biosynthetic process,'de novo' UMP biosynthetic process,female pregnancy,lactation,positive regulation of apoptotic process,pyrimidine ribonucleotide biosynthetic process,regulation of mitochondrial fission,response to caffeine,response to drug,response to L-arginine,response to starvation	dihydroorotate dehydrogenase activity,drug binding,FMN binding,ubiquinone binding	1.86924e-10	311.422	339.848	342.667	325.628	401.22	344.157	361.152	355.534	351.691	342.596	326.953	347.585	0.990137	0.840044	-0.0142999	0.0756982
O35449	Prrt1	Mus musculus	Proline-rich transmembrane protein 1	glutamatergic synapse,integral component of postsynaptic membrane,membrane,postsynaptic density membrane,synaptic vesicle membrane	learning or memory,long-term synaptic potentiation,protein localization,regulation of alpha-amino-3-hydroxy-5-methyl-4-isoxazole propionate selective glutamate receptor activity,synapse organization	receptor regulator activity	2.75273e-15	936.312	863.294	690.839	473.551	547.075	702.214	487.183	570.539	891.403	771.361	826.443	709.386	0.989891	0.952867	-0.014659	0.0209679
O35450	Fkbpl	Mus musculus	FK506-binding protein-like	extracellular region	regulation of angiogenesis,regulation of blood vessel branching		2.94663e-09	50.8967	72.2554	111.299	145.726	91.9676	94.4288	75.5538	93.6255	92.207	132.684	109.121	100.638	0.9383	0.751153	-0.0918796	0.124272
O35454	Clcn6	Mus musculus	Chloride transport protein 6	endosome membrane,integral component of membrane,intracellular membrane-bounded organelle	response to mechanical stimulus	antiporter activity,ATP binding,chloride transmembrane transporter activity,transmembrane transporter activity,voltage-gated chloride channel activity	5.66573e-08	103.181	126.207	128.426	68.4011	60.5423	97.3515	46.1337	109.191	70.544	145.613	100.171	94.3304	1.03203	0.894808	0.0454803	0.0482699
O35459	Ech1	Mus musculus	Delta(3,5)-Delta(2,4)-dienoyl-CoA isomerase, mitochondrial	mitochondrion,peroxisome	fatty acid beta-oxidation	delta3,5-delta2,4-dienoyl-CoA isomerase activity	9.44415e-10	868.649	922.853	840.939	1032.52	926.609	918.314	966.461	787.469	759.454	790.339	827.22	826.188	1.11151	0.098291	0.152516	1.00749
O35465	Fkbp8	Mus musculus	Peptidyl-prolyl cis-trans isomerase FKBP8	cytosol,endoplasmic reticulum,integral component of endoplasmic reticulum membrane,mitochondrial envelope,mitochondrial membrane,mitochondrion,macromolecular complex	apoptotic process,camera-type eye development,cell fate specification,dorsal/ventral neural tube patterning,dorsal/ventral pattern formation,multicellular organism growth,negative regulation of apoptotic process,negative regulation of protein phosphorylation,neural tube development,positive regulation of BMP signaling pathway,protein folding,regulation of BMP signaling pathway,regulation of gene …	disordered domain specific binding,identical protein binding,peptidyl-prolyl cis-trans isomerase activity,protein binding involved in protein folding	1.91142e-15	1071.35	887.399	1021.08	748.65	874.725	920.641	724.139	862.858	915.11	1009.53	848.812	872.09	1.05567	0.528956	0.0781608	0.276581
O35474	Edil3	Mus musculus	EGF-like repeat and discoidin I-like domain-containing protein 3	extracellular region	cell adhesion,multicellular organism development,positive regulation of cell-substrate adhesion	calcium ion binding,integrin binding	7.30089e-10	371.099	404.39	409.117	362.575	414.193	392.275	403.133	371.909	350.544	321.738	314.942	352.453	1.11298	0.074439	0.154434	1.1282
O35495	Cdk14	Mus musculus	Cyclin-dependent kinase 14	cytoplasm,cytoplasmic cyclin-dependent protein kinase holoenzyme complex,cytosol,nucleoplasm,nucleus,plasma membrane	cell division,G2/M transition of mitotic cell cycle,protein phosphorylation,regulation of canonical Wnt signaling pathway,regulation of transcription involved in G1/S transition of mitotic cell cycle,Wnt signaling pathway	ATP binding,cyclin binding,cyclin-dependent protein serine/threonine kinase activity,protein kinase activity,protein serine/threonine kinase activity	6.0386e-12	330.535	334.566	303.102	316.793	318.621	320.724	335.08	359.45	321.033	350.256	332.431	339.65	0.944277	0.0632644	-0.0827182	1.19884
O35526	Stx1a	Mus musculus	Syntaxin-1A	acrosomal vesicle,actomyosin,axon,endomembrane system,glutamatergic synapse,integral component of membrane,integral component of plasma membrane,integral component of presynaptic membrane,integral component of synaptic vesicle membrane,intracellular organelle,membrane,neuron projection,nuclear membrane,plasma membrane,postsynaptic density,presynaptic active zone membrane,presynaptic membrane,macr…	calcium ion regulated exocytosis,exocytosis,hormone secretion,insulin secretion,intracellular protein transport,modulation of excitatory postsynaptic potential,positive regulation of calcium ion-dependent exocytosis,positive regulation of catecholamine secretion,positive regulation of excitatory postsynaptic potential,positive regulation of exocytosis,positive regulation of neurotransmitter secre…	ATP-dependent protein binding,calcium channel inhibitor activity,calcium-dependent protein binding,chloride channel inhibitor activity,identical protein binding,ion channel binding,kinase binding,myosin binding,myosin head/neck binding,macromolecular complex binding,protein domain specific binding,protein binding, bridging,protein N-terminus binding,SNAP receptor activity,SNARE binding	3.06909e-13	3365.14	3985.39	2819.64	1976.02	2322.43	2893.72	1868.7	2689.02	3778.34	3903.8	3701.22	3188.21	0.907632	0.596327	-0.139821	0.224515
O35551	Rabep1	Mus musculus	Rab GTPase-binding effector protein 1	early endosome,endocytic vesicle,endosome,intracellular membrane-bounded organelle,macromolecular complex,recycling endosome	apoptotic process,endocytosis,Golgi to plasma membrane transport,protein localization to ciliary membrane,protein transport,vesicle-mediated transport	growth factor activity,GTPase activator activity,protein domain specific binding,protein homodimerization activity	3.41019e-21	491.392	513.309	494.173	532.295	502.578	506.749	487.349	481.968	512.664	490.795	489.497	492.454	1.02903	0.155596	0.0412821	0.808001
O35593	Psmd14	Mus musculus	26S proteasome non-ATPase regulatory subunit 14	cytosolic proteasome complex,proteasome accessory complex,proteasome complex,proteasome regulatory particle, lid subcomplex	double-strand break repair via homologous recombination,double-strand break repair via nonhomologous end joining,proteasome-mediated ubiquitin-dependent protein catabolic process,protein deubiquitination,protein K63-linked deubiquitination,regulation of proteasomal protein catabolic process,response to ethanol	endopeptidase activator activity,endopeptidase activity,isopeptidase activity,Lys63-specific deubiquitinase activity,metal ion binding,metallopeptidase activity,proteasome binding,thiol-dependent ubiquitin-specific protease activity,thiol-dependent ubiquitinyl hydrolase activity	2.49356e-12	1375.84	1097.51	1284.89	1277.04	1148.83	1236.82	1055.58	1357.77	1182.77	1239.26	1137.17	1194.51	1.03542	0.569509	0.0502173	0.244499
O35594	Ift81	Mus musculus	Intraflagellar transport protein 81 homolog	centrosome,ciliary basal body,cilium,intraciliary transport particle B,sperm midpiece,sperm principal piece	cell differentiation,cilium morphogenesis,intraciliary transport,intraciliary transport involved in cilium morphogenesis,multicellular organism development,regulation of smoothened signaling pathway,spermatogenesis	tubulin binding	0.00387644	384.317	NaN	803.376	446.929	695.344	582.491	211.199	766.336	319.201	1261.34	977.446	707.105	0.82377	0.620252	-0.279687	0.207432
O35598	Adam10	Mus musculus	Disintegrin and metalloproteinase domain-containing protein 10	adherens junction,axon,cell surface,clathrin-coated vesicle,collagen-containing extracellular matrix,cytoplasm,dendrite,dendritic spine,glutamatergic synapse,Golgi apparatus,Golgi-associated vesicle,Golgi membrane,intracellular membrane-bounded organelle,membrane,neuronal cell body,nucleus,perinuclear endoplasmic reticulum,plasma membrane,pore complex,postsynapse,postsynaptic density,postsynaptic…	adherens junction organization,beta-amyloid formation,amyloid precursor protein catabolic process,cochlea development,constitutive protein ectodomain proteolysis,in utero embryonic development,membrane protein ectodomain proteolysis,monocyte activation,negative regulation of cell adhesion,Notch receptor processing,Notch signaling pathway,nucleocytoplasmic transport,PMA-inducible membrane protein …	endopeptidase activity,metal ion binding,metalloendopeptidase activity,metalloendopeptidase activity involved in amyloid precursor protein catabolic process,metallopeptidase activity,protein homodimerization activity,protein kinase binding,SH2 domain binding,SH3 domain binding	1.32507e-10	329.459	430.231	308.749	284.822	266.041	323.86	252.591	316.809	366.696	357.109	347.574	328.156	0.98691	0.90626	-0.0190093	0.0427473
O35604	Npc1	Mus musculus	NPC intracellular cholesterol transporter 1	endoplasmic reticulum,endosome,extracellular region,Golgi apparatus,integral component of lysosomal membrane,integral component of plasma membrane,late endosome membrane,lysosome,membrane,membrane raft,nuclear envelope,perinuclear region of cytoplasm,plasma membrane,vesicle	adult walking behavior,autophagy,bile acid metabolic process,cellular response to low-density lipoprotein particle stimulus,cellular response to steroid hormone stimulus,cholesterol efflux,cholesterol homeostasis,cholesterol metabolic process,cholesterol transport,endocytosis,establishment of protein localization to membrane,intracellular cholesterol transport,lysosomal transport,membrane raft or…	cholesterol binding,lipid transporter activity	3.91605e-13	360.797	390.539	310.782	98.2506	169.46	265.966	127.549	191.034	234.781	248.236	235.674	207.455	1.28204	0.363716	0.358444	0.439238
O35607	Bmpr2	Mus musculus	Bone morphogenetic protein receptor type-2	adherens junction,apical plasma membrane,basal plasma membrane,caveola,cell surface,cytoplasm,dendrite,integral component of plasma membrane,neuronal cell body,nucleoplasm,plasma membrane,postsynaptic density,receptor complex	anterior/posterior pattern specification,aortic valve development,artery development,atrial septum morphogenesis,blood vessel development,blood vessel remodeling,BMP signaling pathway,brain development,cellular response to BMP stimulus,cellular response to growth factor stimulus,cellular response to starvation,chondrocyte development,endocardial cushion development,endochondral bone morphogenesis…	ATP binding,BMP binding,BMP receptor activity,cadherin binding,growth factor binding,metal ion binding,protein serine/threonine kinase activity,protein tyrosine kinase binding,transforming growth factor beta-activated receptor activity	6.47398e-16	345.496	357.363	328.326	267.572	305.888	320.929	237.926	256.058	302.312	333.007	356.435	297.148	1.08003	0.411706	0.111074	0.385413
O35609	Scamp3	Mus musculus	Secretory carrier-associated membrane protein 3	Golgi apparatus,Golgi membrane,integral component of membrane,intracellular membrane-bounded organelle,recycling endosome membrane,trans-Golgi network membrane	intracellular protein transport,protein transport,response to organic substance,response to retinoic acid	ubiquitin protein ligase binding	2.77338e-12	258.948	311.527	247.927	138.177	182.336	227.783	145.191	179.036	225.025	243.627	248.103	208.196	1.09408	0.604731	0.129715	0.218438
O35621	Pmm1	Mus musculus	Phosphomannomutase 1	cytoplasm,cytosol,neuronal cell body	cellular response to leukemia inhibitory factor,GDP-mannose biosynthetic process,mannose metabolic process,protein N-linked glycosylation,protein targeting to ER	metal ion binding,phosphomannomutase activity	1.16626e-13	1079.86	900.122	1096.28	1093.18	1036.56	1041.2	1045.44	1060.76	1052.29	961.425	996.912	1023.37	1.01743	0.678599	0.0249243	0.168387
O35633	Slc32a1	Mus musculus	Vesicular inhibitory amino acid transporter	cell tip,cone cell pedicle,dendrite,dendrite terminus,GABA-ergic synapse,inhibitory synapse,integral component of plasma membrane,integral component of synaptic vesicle membrane,intracellular organelle,neuron projection,neuron projection terminus,plasma membrane,presynaptic active zone,synapse,synaptic vesicle	aging,gamma-aminobutyric acid transport,glycine transport,hippocampus development,neurotransmitter loading into synaptic vesicle	gamma-aminobutyric acid:proton symporter activity,glycine transmembrane transporter activity	1.27267e-10	2568.26	3307.87	2167.75	1538.89	1682.7	2253.1	1345.7	1560.94	2271.68	2486.33	2216.09	1976.15	1.14014	0.496958	0.189216	0.303681
O35639	Anxa3	Mus musculus	Annexin A3	axon,collagen-containing extracellular matrix,cytoplasm,cytosol,dendrite,membrane,neuronal cell body,phagocytic vesicle membrane,plasma membrane,specific granule	animal organ regeneration,defense response to bacterium,hippocampus development,neutrophil degranulation,phagocytosis,positive regulation of angiogenesis,positive regulation of sequence-specific DNA binding transcription factor activity,positive regulation of DNA metabolic process,positive regulation of endothelial cell migration,response to glucocorticoid,response to growth factor	calcium-dependent phospholipid binding,calcium-dependent protein binding,calcium ion binding,phospholipase A2 inhibitor activity	2.27732e-12	799.822	743.506	845.064	899.219	799.712	817.465	811.37	782.818	696.121	820.446	694.429	761.037	1.07415	0.174859	0.10319	0.757312
O35643	Ap1b1	Mus musculus	AP-1 complex subunit beta-1	clathrin adaptor complex,clathrin-coated vesicle membrane,cytosol,Golgi apparatus,intracellular membrane-bounded organelle,trans-Golgi network	clathrin coat assembly,determination of left/right symmetry,heart development,intracellular protein transport,kidney development,vesicle-mediated transport	clathrin binding,protein kinase binding	2.04818e-16	7058.84	7885.35	7656.56	7849.38	8108.9	7711.81	7031.29	7483.43	7956	7735.99	7333.01	7507.95	1.02715	0.419426	0.0386509	0.377345
O35658	C1qbp	Mus musculus	Complement component 1 Q subcomponent-binding protein, mitochondrial	cell surface,cytoplasm,cytosol,extracellular space,GABA-ergic synapse,glutamatergic synapse,membrane,mitochondrial matrix,mitochondrion,nucleolus,nucleus,plasma membrane,presynapse,presynaptic active zone	apoptotic process,complement activation, classical pathway,innate immune response,mature ribosome assembly,mRNA processing,negative regulation of defense response to virus,negative regulation of interferon-gamma production,negative regulation of interleukin-12 production,negative regulation of MDA-5 signaling pathway,negative regulation of mRNA splicing, via spliceosome,negative regulation of RIG…	adrenergic receptor binding,complement component C1q binding,hyaluronic acid binding,kininogen binding,mitochondrial ribosome binding,mRNA binding,protein kinase C binding,transcription corepressor activity,transcription factor binding,translation activator activity	2.54701e-09	4931.79	4025.08	4284.2	4895.29	5227.33	4672.74	5592.59	5327.73	3997.17	3736.32	3803.96	4491.55	1.04034	0.70269	0.0570531	0.153236
O35668	Hap1	Mus musculus	Huntingtin-associated protein 1	autophagosome,axon cytoplasm,axon terminus,centriole,centrosome,cytoplasm,cytoplasmic vesicle,cytosol,dendrite,dendritic spine,early endosome,endoplasmic reticulum,GABA-ergic synapse,growth cone,inclusion body,lysosome,mitochondrion,neuron projection,nucleolus,perinuclear region of cytoplasm,postsynaptic cytosol,presynaptic cytosol,synaptic vesicle	anterograde axonal transport,anterograde axonal transport of mitochondrion,autophagy,cerebellum development,exocytosis,hypothalamus cell differentiation,mitochondrion distribution,negative regulation of beta-amyloid formation,neurogenesis,neuron projection development,neurotrophin TRK receptor signaling pathway,positive regulation of epidermal growth factor receptor signaling pathway,positive reg…	brain-derived neurotrophic factor binding,identical protein binding,ion channel binding,myosin binding,protein domain specific binding,receptor binding	1.77284e-10	516.969	531.912	451.635	570.375	666.426	547.463	654.199	331.05	250.36	404.65	365.179	401.088	1.36495	0.0931813	0.448844	1.03067
O35671	Itgb1bp1	Mus musculus	Integrin beta-1-binding protein 1	cell periphery,centriolar satellite,cytoplasm,cytoskeleton,cytosol,lamellipodium,nuclear body,nucleoplasm,nucleus,perinuclear region of cytoplasm,plasma membrane,ruffle	activation of protein kinase B activity,biomineral tissue development,blood vessel endothelial cell proliferation involved in sprouting angiogenesis,cell differentiation,cell-matrix adhesion,cellular response to fibroblast growth factor stimulus,cellular response to vascular endothelial growth factor stimulus,integrin activation,integrin-mediated signaling pathway,myoblast migration,negative regu…	GDP-dissociation inhibitor activity,integrin binding,kinase binding,protein C-terminus binding,protein kinase binding	5.85829e-05	46.9335	37.2019	22.708	39.906	32.3977	35.8294	25.5529	17.9001	31.8211	NaN	29.703	26.2443	1.36523	0.114136	0.449142	0.942577
O35678	Mgll	Mus musculus	Monoglyceride lipase	axon,cytosol,extrinsic component of membrane,membrane,nucleoplasm,synapse,varicosity	acylglycerol catabolic process,arachidonic acid metabolic process,fatty acid biosynthetic process,long term synaptic depression,monoacylglycerol catabolic process,negative regulation of blood vessel diameter,regulation of axon extension,regulation of endocannabinoid signaling pathway,regulation of inflammatory response,regulation of sensory perception of pain,regulation of signal transduction,tri…	acylglycerol lipase activity,hydrolase activity,lipase activity,protein homodimerization activity	6.73729e-13	3326.13	3141.54	3502.3	3384.48	3440.92	3359.07	3134.84	3678.34	3665.93	3699.59	3647.15	3565.17	0.942192	0.135997	-0.0859068	0.866472
O35680	Mrps12	Mus musculus	28S ribosomal protein S12, mitochondrial	mitochondrial small ribosomal subunit,mitochondrion,ribosome	mitochondrial translation,translation	structural constituent of ribosome	5.19888e-05	467.403	378.017	433.48	380.518	504.722	432.828	571.479	604.495	410.832	451.195	577.779	523.156	0.82734	0.0836934	-0.273448	1.07731
O35681	Syt3	Mus musculus	Synaptotagmin-3	endosome,exocytic vesicle,integral component of synaptic membrane,plasma membrane,presynapse,transport vesicle membrane	calcium ion regulated exocytosis,calcium ion-regulated exocytosis of neurotransmitter,cellular response to calcium ion,positive regulation of dendrite extension,positive regulation of vesicle fusion,regulation of calcium ion-dependent exocytosis,regulation of dopamine secretion,response to calcium ion,vesicle-mediated transport	calcium-dependent phospholipid binding,calcium ion binding,clathrin binding,identical protein binding,phosphatidylinositol-4,5-bisphosphate binding,phosphatidylserine binding,protein heterodimerization activity,protein homodimerization activity,SNARE binding,syntaxin binding	4.02869e-13	260.601	299.909	202.287	173.554	200.008	227.272	161.639	191.276	249.268	231.39	202.192	207.153	1.09712	0.488403	0.133722	0.311222
O35682	Myadm	Mus musculus	Myeloid-associated differentiation marker	cell-cell junction,cortical actin cytoskeleton,integral component of membrane,membrane raft,plasma membrane,ruffle	establishment of endothelial barrier,membrane raft organization,negative regulation of actin filament polymerization,negative regulation of gene expression,negative regulation of heterotypic cell-cell adhesion,negative regulation of protein kinase C signaling,negative regulation of protein phosphorylation,positive regulation of cell migration,positive regulation of substrate adhesion-dependent ce…		2.71981e-14	801.806	1017.67	637.57	399.113	418.558	654.944	340.052	470.136	809.443	872.735	723.68	643.209	1.01824	0.941687	0.0260833	0.0260933
O35683	Ndufa1	Mus musculus	NADH dehydrogenase [ubiquinone] 1 alpha subcomplex subunit 1	cytosol,integral component of membrane,mitochondrial membrane,mitochondrial respiratory chain complex I,mitochondrion	mitochondrial respiratory chain complex I assembly,oxidation-reduction process		4.1729e-07	1391.87	803.365	1032.81	525.506	763.435	903.398	727.929	952.42	923.853	954.442	764.43	864.615	1.04486	0.8078	0.063304	0.092696
O35684	Serpini1	Mus musculus	Neuroserpin	cytoplasmic membrane-bounded vesicle lumen,extracellular space,neuronal cell body,perikaryon,secretory granule lumen	negative regulation of endopeptidase activity,positive regulation of neuron projection development,regulation of cell adhesion	serine-type endopeptidase inhibitor activity	2.05861e-09	229.211	177.555	208.266	176.861	163.485	191.076	194.712	178.766	191.224	222.874	202.041	197.923	0.965404	0.639475	-0.0507959	0.194176
O35685	Nudc	Mus musculus	Nuclear migration protein nudC	cytoplasm,cytosol,Golgi apparatus,microtubule,nucleus	cell cycle,cell division,developmental process,nuclear migration,protein folding	unfolded protein binding	3.86951e-14	1781.43	1416.73	1583.88	1573.05	1573	1585.62	1616.3	1451.27	1450.9	1415.57	1363.42	1459.49	1.08642	0.117	0.119579	0.931814
O35691	Pnn	Mus musculus	Pinin	catalytic step 2 spliceosome,cell-cell junction,cytoplasm,desmosome,nuclear speck	cell adhesion,cell-cell adhesion,mRNA processing,RNA splicing	DNA binding	2.69983e-09	241.351	215.003	300.772	198.433	226.99	236.51	237.224	181.546	224.674	264.048	255.227	232.544	1.01705	0.865918	0.024397	0.0625234
O35710	Noct	Mus musculus	Nocturnin	cytoplasm,mitochondrion,nucleus,cytoplasmic mRNA processing body,perinuclear region of cytoplasm	circadian regulation of gene expression,circadian rhythm,cytoplasmic mRNA processing body assembly,deadenylation-dependent decapping of nuclear-transcribed mRNA,mRNA stabilization,NADP metabolic process,negative regulation of gene expression,negative regulation of osteoblast differentiation,positive regulation of fat cell differentiation,regulation of circadian rhythm,regulation of embryonic deve…	3'-5'-exoribonuclease activity,metal ion binding,mRNA binding,NADPH phosphatase activity,NADP phosphatase activity,poly(A)-specific ribonuclease activity	2.04363e-06	334.868	299.267	258.145	285.354	233.821	282.291	293.409	354.942	258.081	260.189	258.959	285.116	0.990091	0.914415	-0.0143664	0.0388565
O35737	Hnrnph1	Mus musculus	Heterogeneous nuclear ribonucleoprotein H	catalytic step 2 spliceosome,cytosol,nucleoplasm,nucleus,ribonucleoprotein complex	cellular response to interleukin-7,mRNA processing,regulation of RNA splicing,RNA splicing	identical protein binding,RNA binding	1.00773e-14	2815.21	2375.6	2398.09	2617.74	2425.31	2526.39	2575.91	2536.45	2454.19	2290.05	2601.44	2491.61	1.01396	0.739683	0.0199987	0.130955
O35841	Api5	Mus musculus	Apoptosis inhibitor 5	cytoplasm,nuclear speck,nucleus,spliceosomal complex	apoptotic process,negative regulation of apoptotic process,negative regulation of fibroblast apoptotic process	fibroblast growth factor binding,RNA binding	1.47881e-12	1095.25	1214.34	1219.86	1271.6	1213.9	1202.99	1157.31	1174.12	1132.78	1228.74	1170.74	1172.74	1.0258	0.386547	0.0367435	0.412798
O35855	Bcat2	Mus musculus	Branched-chain-amino-acid aminotransferase, mitochondrial	cytoplasm,mitochondrion,nucleus	branched-chain amino acid catabolic process,branched-chain amino acid metabolic process,cellular response to leukemia inhibitory factor,isoleucine catabolic process,isoleucine metabolic process,leucine biosynthetic process,leucine metabolic process,regulation of hormone levels,valine biosynthetic process,valine metabolic process	branched-chain-amino-acid transaminase activity,L-isoleucine transaminase activity,L-leucine transaminase activity,L-valine transaminase activity	3.46743e-11	516.82	473.412	519.493	517.526	449.171	495.284	478.449	504.015	409.312	458.67	449.883	460.066	1.07655	0.137338	0.106417	0.862209
O35857	Timm44	Mus musculus	Mitochondrial import inner membrane translocase subunit TIM44	mitochondrial inner membrane,mitochondrial matrix,mitochondrion	intracellular protein transport,protein import into mitochondrial matrix	ATP binding,chaperone binding,enzyme binding	6.4857e-15	698.139	673.822	759.314	665.253	641.602	687.626	620.591	636.739	661.9	741.112	701.733	672.415	1.02262	0.623013	0.0322718	0.205503
O35864	Cops5	Mus musculus	COP9 signalosome complex subunit 5	chromatin,COP9 signalosome,cytoplasm,cytosol,nucleoplasm,nucleus,perinuclear region of cytoplasm,synaptic vesicle,transcription factor complex	exosomal secretion,negative regulation of apoptotic process,positive regulation of sequence-specific DNA binding transcription factor activity,positive regulation of transcription from RNA polymerase II promoter,protein deneddylation,protein deubiquitination,regulation of cell cycle,regulation of IRE1-mediated unfolded protein response,regulation of JNK cascade,regulation of transcription, DNA-te…	enzyme binding,isopeptidase activity,macrophage migration inhibitory factor binding,metal ion binding,metalloendopeptidase activity,metallopeptidase activity,NEDD8-specific protease activity,thiol-dependent ubiquitin-specific protease activity,transcription coactivator activity	2.59308e-15	1500.94	1299.82	1511.03	1331.98	1347.21	1398.19	1269.82	1446.69	1305.37	1240.47	1301.8	1312.83	1.06502	0.173059	0.0908826	0.761805
O35874	Slc1a4	Mus musculus	Neutral amino acid transporter A	centrosome,dendrite,integral component of membrane,intermediate filament,melanosome,membrane,neuronal cell body,plasma membrane	cognition,hydroxyproline transport,L-alanine import across plasma membrane,L-alanine transport,L-aspartate import across plasma membrane,L-serine import into cell,L-serine transport,proline transport,threonine transport	chloride channel activity,L-alanine transmembrane transporter activity,L-aspartate transmembrane transporter activity,L-cystine transmembrane transporter activity,L-hydroxyproline transmembrane transporter activity,L-proline transmembrane transporter activity,L-serine transmembrane transporter activity,L-threonine transmembrane transporter activity,neutral amino acid transmembrane transporter act…	1.03908e-09	515.711	639.03	308.409	205.709	221.193	378.011	290.931	300.271	366.714	358.829	343.417	332.032	1.13847	0.611025	0.187103	0.213941
O35887	Calu	Mus musculus	Calumenin	endoplasmic reticulum,endoplasmic reticulum lumen,endoplasmic reticulum membrane,extracellular region,Golgi apparatus,intracellular membrane-bounded organelle,melanosome,sarcoplasmic reticulum lumen		calcium ion binding,enzyme binding,enzyme inhibitor activity	2.83651e-16	1118.32	902.27	940.426	1129.25	1087.72	1035.6	1136.61	1010.03	877.497	890.068	910.67	964.976	1.07318	0.330338	0.101897	0.481042
O35900	Lsm2	Mus musculus	U6 snRNA-associated Sm-like protein LSm2	catalytic step 2 spliceosome,cytoplasm,Lsm1-7-Pat1 complex,Lsm2-8 complex,nucleoplasm,nucleus,cytoplasmic mRNA processing body,precatalytic spliceosome,U2-type precatalytic spliceosome,U4/U6 x U5 tri-snRNP complex,U6 snRNP	mRNA catabolic process,mRNA splicing, via spliceosome,spliceosomal tri-snRNP complex assembly	protein kinase binding,Ral GTPase binding,RNA binding	1.97535e-05	192.305	193.342	171.956	180.019	196.44	186.812	147.409	195.301	206.626	188.494	176.511	182.868	1.02157	0.732379	0.0307865	0.135264
O35927	Ctnnd2	Mus musculus	Catenin delta-2	adherens junction,cell-cell junction,cytoplasm,dendrite,neuron projection,nucleus,perikaryon,plasma membrane,postsynaptic density	cell-cell adhesion,cell-cell junction assembly,dendritic spine morphogenesis,learning,morphogenesis of a branching structure,regulation of canonical Wnt signaling pathway,regulation of synaptic plasticity,synapse organization	beta-catenin binding,cadherin binding	2.9854e-16	1483.97	1623.33	1551.13	1540.05	1577.43	1555.18	1555.74	1467.21	1623.73	1565.35	1519.95	1546.4	1.00568	0.805617	0.00817267	0.0938715
O35943	Fxn	Mus musculus	Frataxin, mitochondrial	cytosol,L-cysteine desulfurase complex,mitochondrion	adult walking behavior,aerobic respiration,cellular iron ion homeostasis,cellular response to hydrogen peroxide,embryo development ending in birth or egg hatching,heme biosynthetic process,ion transport,iron incorporation into metallo-sulfur cluster,iron-sulfur cluster assembly,mitochondrion organization,negative regulation of apoptotic process,negative regulation of multicellular organism growth…	2 iron, 2 sulfur cluster binding,enzyme binding,ferric iron binding,ferrous iron binding,ferroxidase activity,iron chaperone activity	2.04845e-11	1220.9	757.592	1035.16	1083.82	953.05	1010.1	1118.27	1142.03	776.646	659.24	729.623	885.162	1.14115	0.355625	0.190489	0.449007
O35954	Pitpnm1	Mus musculus	Membrane-associated phosphatidylinositol transfer protein 1	cell body,cleavage furrow,cytoplasm,cytoplasmic ribonucleoprotein granule,cytosol,endoplasmic reticulum membrane,Golgi cisterna membrane,lipid particle,midbody	phospholipid transport,protein transport	calcium ion binding,phosphatidic acid binding,phosphatidylcholine binding,phosphatidylcholine transporter activity,phosphatidylinositol binding,phosphatidylinositol transporter activity,phospholipid binding,receptor tyrosine kinase binding	7.15149e-21	1346	1328.2	1345.64	1277.81	1348.25	1329.18	1265.83	1334.97	1535.23	1510.75	1429.06	1415.17	0.939238	0.142912	-0.0904371	0.84493
O35955	Psmb10	Mus musculus	Proteasome subunit beta type-10	cytoplasm,cytosol,nucleoplasm,nucleus,proteasome core complex,proteasome core complex, beta-subunit complex,spermatoproteasome complex	cell morphogenesis,proteasomal protein catabolic process,proteasomal ubiquitin-independent protein catabolic process,proteasome-mediated ubiquitin-dependent protein catabolic process,T cell proliferation	endopeptidase activity,threonine-type endopeptidase activity	0.000109294	159.303	122.072	141.273	113.555	150.364	137.313	165.583	100.874	120.075	89.4416	120.312	119.257	1.15141	0.279276	0.203396	0.553967
O35963	Rab33b	Mus musculus	Ras-related protein Rab-33B	endosome,Golgi apparatus,Golgi lumen,Golgi membrane,presynapse	autophagosome assembly,intra-Golgi vesicle-mediated transport,negative regulation of constitutive secretory pathway,protein localization to Golgi apparatus,protein transport,Rab protein signal transduction,regulation of Golgi organization,regulation of retrograde vesicle-mediated transport, Golgi to ER,skeletal system morphogenesis	GTPase activity,GTP binding	4.0883e-11	479.022	642.651	479.42	393.493	432.366	485.391	379.775	416.129	515.659	434.13	428.033	434.745	1.11649	0.321921	0.158976	0.492251
O35969	Gamt	Mus musculus	Guanidinoacetate N-methyltransferase	cytoplasm,cytosol,microvillus,nucleus	animal organ morphogenesis,creatine biosynthetic process,methylation,regulation of multicellular organism growth,S-adenosylhomocysteine metabolic process,S-adenosylmethionine metabolic process,spermatogenesis	guanidinoacetate N-methyltransferase activity,identical protein binding,S-adenosylmethionine-dependent methyltransferase activity	1.49347e-08	913.882	736.264	921.807	667.085	684.954	784.799	643.433	918.155	788.786	995.464	797.296	828.627	0.947107	0.607336	-0.0784001	0.216571
O35972	Mrpl23	Mus musculus	39S ribosomal protein L23, mitochondrial	fibrillar center,mitochondrial large ribosomal subunit,mitochondrion	mitochondrial translation,translation	structural constituent of ribosome	2.92753e-08	172.672	163.209	178.309	166.067	173.544	170.76	167.944	152.339	182.909	141.902	183.881	165.795	1.02995	0.585117	0.04257	0.232757
O35988	Sdc4	Mus musculus	Syndecan-4	cell surface,costamere,extracellular region,focal adhesion,Golgi lumen,integral component of membrane,membrane raft	cell migration,inner ear receptor stereocilium organization,negative regulation of T cell proliferation,neural tube closure,positive regulation of exosomal secretion,positive regulation of extracellular exosome assembly,positive regulation of focal adhesion assembly,positive regulation of protein kinase activity,positive regulation of stress fiber assembly,regulation of fibroblast migration,urete…	fibronectin binding,identical protein binding,protein kinase C binding,thrombospondin receptor activity	0.000142761	281.86	284.058	291.606	131.934	241.831	246.258	185.682	169.904	171.56	138.177	178.598	168.784	1.45901	0.0368041	0.54499	1.4341
O54692	Zw10	Mus musculus	Centromere/kinetochore protein zw10 homolog	condensed chromosome kinetochore,cytosol,Dsl1/NZR complex,endoplasmic reticulum,endoplasmic reticulum membrane,kinetochore,kinetochore microtubule,lipid particle,nucleus,RZZ complex,spindle pole	cell division,ER to Golgi vesicle-mediated transport,establishment of mitotic spindle orientation,Golgi organization,mitotic cell cycle checkpoint,mitotic metaphase plate congression,mitotic sister chromatid segregation,mitotic spindle assembly checkpoint,macromolecular complex assembly,protein localization to kinetochore,protein transport,regulation of exit from mitosis		2.97e-05	465.178	305.508	464.652	340.881	256.732	366.59	207.643	372.097	293.231	375.5	307.728	311.24	1.17784	0.320783	0.236141	0.493789
O54724	Cavin1	Mus musculus	Caveolae-associated protein 1	caveola,cytoplasm,cytosol,endoplasmic reticulum,intracellular membrane-bounded organelle,membrane raft,mitochondrion,nucleus,plasma membrane,macromolecular complex	positive regulation of cell motility,protein secretion,rRNA transcription,termination of RNA polymerase I transcription,transcription initiation from RNA polymerase I promoter	identical protein binding,rRNA primary transcript binding	1.89777e-16	758.985	802.267	956.817	935.075	826.641	855.957	869.122	931.081	800.128	881.164	878.348	871.968	0.981638	0.724165	-0.0267376	0.140163
O54734	Ddost	Mus musculus	Dolichyl-diphosphooligosaccharide--protein glycosyltransferase 48 kDa subunit	endoplasmic reticulum,integral component of membrane,intracellular membrane-bounded organelle,oligosaccharyltransferase complex	protein glycosylation,protein N-linked glycosylation,protein N-linked glycosylation via asparagine,regulation of protein stability,response to cytokine,T cell activation	enzyme activator activity	9.34358e-11	771.55	824.894	801.237	732.539	682.573	762.559	666.589	731.941	887.711	889.282	845.848	804.274	0.948133	0.440622	-0.0768391	0.355934
O54774	Ap3d1	Mus musculus	AP-3 complex subunit delta-1	AP-3 adaptor complex,axon,axon cytoplasm,endosome membrane,glutamatergic synapse,Golgi membrane,postsynapse,presynaptic endosome,terminal bouton,trans-Golgi network	anterograde axonal transport,anterograde synaptic vesicle transport,antigen processing and presentation,antigen processing and presentation, exogenous lipid antigen via MHC class Ib,endosome to melanosome transport,Golgi to vacuole transport,intracellular protein transport,neurotransmitter receptor transport, postsynaptic endosome to lysosome,positive regulation of NK T cell differentiation,prote…		4.90963e-21	1766.19	2179.16	1594.81	1447.46	1535.07	1704.54	1384.07	1528.36	1770.99	1918.14	1888.91	1698.1	1.00379	0.970063	0.00546212	0.0132002
O54781	Srpk2	Mus musculus	SRSF protein kinase 2	chromatin,cytoplasm,cytosol,nuclear speck,nucleolus,nucleoplasm,nucleus	angiogenesis,cell differentiation,intracellular signal transduction,negative regulation of viral genome replication,nuclear speck organization,peptidyl-serine phosphorylation,positive regulation of cell cycle,positive regulation of cell proliferation,positive regulation of gene expression,positive regulation of neuron apoptotic process,positive regulation of viral genome replication,protein phosp…	14-3-3 protein binding,ATP binding,magnesium ion binding,MAP kinase activity,protein serine/threonine kinase activity	1.1826e-18	469.584	589.585	552.599	577.981	537.281	545.406	579.738	513.447	584.491	577.572	591.989	569.447	0.957781	0.371929	-0.0622316	0.42954
O54782	Man2b2	Mus musculus	Epididymis-specific alpha-mannosidase	extracellular region,lysosome,vacuolar membrane	mannose metabolic process	alpha-mannosidase activity,carbohydrate binding,metal ion binding	4.44417e-12	182.649	155.315	156.803	140.493	171.228	161.298	137.809	154.391	136.424	153.894	126.673	141.838	1.13719	0.0626933	0.185479	1.20278
O54784	Dapk3	Mus musculus	Death-associated protein kinase 3	actin filament,chromosome, centromeric region,cytoplasm,membrane raft,microtubule organizing center,nucleoplasm,nucleus,PML body	apoptotic process,apoptotic signaling pathway,cellular response to interferon-gamma,chromatin organization,intracellular signal transduction,negative regulation of translation,neuron differentiation,positive regulation of apoptotic process,positive regulation of canonical Wnt signaling pathway,positive regulation of cell migration,positive regulation of extrinsic apoptotic signaling pathway in ab…	ATP binding,identical protein binding,kinase activity,leucine zipper domain binding,protein C-terminus binding,protein homodimerization activity,protein serine/threonine kinase activity,Rho GTPase binding	4.41527e-07	169.638	149.193	136.942	207.783	131.279	158.967	205.33	213.404	144.017	136.254	170.862	173.974	0.913742	0.492596	-0.130141	0.307509
O54786	Dffa	Mus musculus	DNA fragmentation factor subunit alpha	cytosol,nuclear chromatin,nucleus,plasma membrane,macromolecular complex	apoptotic DNA fragmentation,chaperone-mediated protein folding,negative regulation of apoptotic DNA fragmentation,negative regulation of deoxyribonuclease activity,negative regulation of execution phase of apoptosis,positive regulation of apoptotic process,regulation of apoptotic process,thymocyte apoptotic process	deoxyribonuclease inhibitor activity,protein domain specific binding,protein binding involved in protein folding	2.58712e-10	196.829	196.947	212.149	218.153	199.064	204.628	205.335	211.675	190.213	161.579	166.309	187.022	1.09414	0.148138	0.129796	0.829333
O54818	Tpd52l1	Mus musculus	Tumor protein D53	cytoplasm,early endosome,perinuclear region of cytoplasm	G2/M transition of mitotic cell cycle,positive regulation of apoptotic signaling pathway,positive regulation of JNK cascade,positive regulation of MAP kinase activity	identical protein binding,protein homodimerization activity	1.69671e-12	232.308	161.844	228.744	214.566	225.359	212.564	205.114	175.424	159.651	201.452	163.213	180.971	1.17458	0.0856173	0.232141	1.06744
O54824	Il16	Mus musculus	Pro-interleukin-16	collagen-containing extracellular matrix,cytosol,extracellular space,Flemming body,nuclear speck,plasma membrane	cytokine-mediated signaling pathway,induction of positive chemotaxis,leukocyte chemotaxis,positive regulation of chemokine biosynthetic process,positive regulation of gene expression,positive regulation of inflammatory response,positive regulation of interleukin-12 production,positive regulation of interleukin-1 alpha production,positive regulation of interleukin-6 production,positive regulation …	CD4 receptor binding,cytokine activity	0.00369943	NaN	220.538	NaN	208.564	NaN	214.551	NaN	216.98	NaN	NaN	NaN	216.98	0.988802	#DIV/0!	-0.0162471	#DIV/0!
O54829	Rgs7	Mus musculus	Regulator of G-protein signaling 7	cytoplasm,cytosol,dendrite terminus,glutamatergic synapse,membrane raft,nuclear envelope,nucleus,plasma membrane,postsynaptic membrane,presynapse,macromolecular complex	G-protein coupled receptor signaling pathway,intracellular signal transduction,negative regulation of signal transduction,positive regulation of GTPase activity,positive regulation of potassium ion transmembrane transport,regulation of G-protein coupled receptor protein signaling pathway	G-protein alpha-subunit binding,G-protein beta-subunit binding,GTPase activator activity	5.56597e-13	2072.43	2015.51	2053.94	2098.08	2098.33	2067.66	2049.16	1982.35	2063.94	2173.45	1945.24	2042.83	1.01216	0.572023	0.0174304	0.242587
O54833	Csnk2a2	Mus musculus	Casein kinase II subunit alpha'	acrosomal vesicle,chromatin,cytoplasm,cytosol,nucleus,PcG protein complex,plasma membrane,protein kinase CK2 complex	apoptotic process,cell cycle,cerebral cortex development,liver regeneration,negative regulation of protein ubiquitination involved in ubiquitin-dependent protein catabolic process,peptidyl-serine phosphorylation,peptidyl-threonine phosphorylation,protein phosphorylation,regulation of cell cycle,regulation of chromosome separation,spermatogenesis,Wnt signaling pathway	ATP binding,protein kinase activity,protein N-terminus binding,protein serine/threonine kinase activity	2.3963e-17	1116.85	1363.14	1295.52	1348.42	1373.3	1299.45	1330.66	1275.81	1249.73	1343.63	1234.94	1286.96	1.00971	0.817071	0.013935	0.0877404
O54865	Gucy1b1	Mus musculus	Guanylate cyclase soluble subunit beta-1	cytoplasm,glutamatergic synapse,guanylate cyclase complex, soluble,presynaptic active zone,presynaptic active zone cytoplasmic component,macromolecular complex	cellular response to nitric oxide,cGMP biosynthetic process,cGMP-mediated signaling,nitric oxide-cGMP-mediated signaling pathway,trans-synaptic signaling by nitric oxide, modulating synaptic transmission	adenylate cyclase activity,cytidylate cyclase activity,GTP binding,guanylate cyclase activity,heme binding,Hsp90 protein binding,ion binding,metal ion binding,macromolecular complex binding	1.62829e-13	935.399	865.075	946.897	912.193	870.411	905.995	858.901	989.251	920.077	958.292	910.457	927.395	0.976924	0.461752	-0.0336817	0.335592
O54879	Hmgb3	Mus musculus	High mobility group protein B3	cytoplasm,nuclear chromatin,nucleus	chromatin remodeling,DNA geometric change,DNA recombination,innate immune response,negative regulation of B cell differentiation,negative regulation of myeloid cell differentiation,positive regulation of innate immune response,positive regulation of transcription from RNA polymerase II promoter,regulation of transcription, DNA-templated,regulation of transcription from RNA polymerase II promoter	chromatin binding,DNA binding,DNA binding, bending,four-way junction DNA binding,RNA binding,transcription factor binding	2.33416e-08	477.538	398.61	414.535	422.274	515.175	445.626	475.729	456.785	452.288	484.821	396.378	453.2	0.983288	0.784385	-0.0243138	0.105471
O54901	Cd200	Mus musculus	OX-2 membrane glycoprotein	axon,cell body,cell surface,integral component of membrane,neuronal cell body,neuron projection,plasma membrane	cell-cell adhesion,heterotypic cell-cell adhesion,negative regulation of cell proliferation,negative regulation of interleukin-6 production,negative regulation of macrophage activation,negative regulation of macrophage migration,negative regulation of matrix metallopeptidase secretion,negative regulation of neuroinflammatory response,negative regulation of neuron death,negative regulation of NF-k…	protein binding involved in heterotypic cell-cell adhesion	7.52473e-11	1392.68	1647.57	1248.36	991.659	1054.88	1267.03	923.647	1111.97	1180.03	1417.1	1329.38	1192.42	1.06257	0.624581	0.0875512	0.204411
O54916	Reps1	Mus musculus	RalBP1-associated Eps domain-containing protein 1	clathrin-coated pit,plasma membrane	endocytosis,endosomal transport,receptor-mediated endocytosis	calcium ion binding,SH3 domain binding	2.44525e-12	1000.18	938.093	972.771	905.564	899.852	943.291	856.123	920.509	871.426	990.87	888.514	905.489	1.04175	0.253085	0.0590064	0.596734
O54931	Akap2	Mus musculus	A-kinase anchor protein 2				2.49909e-14	462.973	455.215	439.435	456	392.101	441.145	430.058	429.391	442.335	497.461	452.285	450.306	0.979656	0.62352	-0.0296526	0.20515
O54941	Smarce1	Mus musculus	SWI/SNF-related matrix-associated actin-dependent regulator of chromatin subfamily E member 1	nBAF complex,npBAF complex,nucleoplasm,nucleus,SWI/SNF complex	ATP-dependent chromatin remodeling,chromatin remodeling,negative regulation of transcription, DNA-templated,neurogenesis,nucleosome disassembly	DNA binding,N-acetyltransferase activity,ligand-dependent nuclear receptor binding,protein N-terminus binding,RNA binding	2.63202e-11	379.685	316.267	337.846	406.593	367.566	361.592	321.039	363.933	367.457	400.776	324.486	355.538	1.01703	0.787377	0.0243561	0.103817
O54942	Cldn5	Mus musculus	Claudin-5	apicolateral plasma membrane,bicellular tight junction,cell-cell junction,integral component of membrane,lateral plasma membrane,paranode region of axon,plasma membrane,Schmidt-Lanterman incisure,occluding junction	bicellular tight junction assembly,calcium-independent cell-cell adhesion via plasma membrane cell-adhesion molecules,cell adhesion,cell-cell adhesion,cell-cell junction assembly,establishment of blood-retinal barrier,maintenance of blood-brain barrier,myelination,negative regulation of angiogenesis,negative regulation of cell migration,negative regulation of gene expression,negative regulation o…	identical protein binding,structural molecule activity	0.000293951	47.1791	90.4261	69.39	55.1562	NaN	65.5379	NaN	53.0224	72.0294	49.2803	112.096	71.607	0.915244	0.736699	-0.127772	0.13271
O54946	Dnajb6	Mus musculus	DnaJ homolog subfamily B member 6	cytoplasm,cytosol,nucleoplasm,nucleus,perinuclear region of cytoplasm,Z disc	actin cytoskeleton organization,chaperone-mediated protein folding,chorio-allantoic fusion,chorion development,extracellular matrix organization,intermediate filament organization,negative regulation of cysteine-type endopeptidase activity involved in apoptotic process,negative regulation of inclusion body assembly,negative regulation of transcription, DNA-templated,protein folding,protein locali…	ATPase activator activity,chaperone binding,DNA binding,heat shock protein binding,identical protein binding,protein binding involved in protein folding,unfolded protein binding	1.11922e-09	1115.21	848.312	1258.86	939.869	1008.28	1034.11	866.993	1068.85	865.685	1082.99	1031.5	983.206	1.05177	0.570513	0.0728194	0.243734
O54949	Nlk	Mus musculus	Serine/threonine-protein kinase NLK	cytoplasm,nucleus	intracellular signal transduction,negative regulation of Wnt signaling pathway,peptidyl-threonine phosphorylation,protein autophosphorylation,protein phosphorylation,protein stabilization,regulation of gene expression,regulation of transcription, DNA-templated,serine phosphorylation of STAT protein,transforming growth factor beta receptor signaling pathway,Wnt signaling pathway	ATP binding,magnesium ion binding,MAP kinase activity,protein kinase activity,protein serine/threonine kinase activity,SH2 domain binding,transcription factor binding,ubiquitin protein ligase binding	0.00551973	735.883	NaN	NaN	NaN	NaN	735.883	1009.12	1220.19	NaN	NaN	NaN	1114.65	0.66019	#DIV/0!	-0.599046	#DIV/0!
O54950	Prkag1	Mus musculus	5'-AMP-activated protein kinase subunit gamma-1	cytoplasm,cytosol,nucleoplasm,nucleotide-activated protein kinase complex,nucleus,macromolecular complex	cellular response to glucose starvation,fatty acid biosynthetic process,nuclear import,positive regulation of gene expression,protein phosphorylation,regulation of catalytic activity,regulation of protein serine/threonine kinase activity	ADP binding,AMP-activated protein kinase activity,AMP binding,ATP binding,macromolecular complex binding,protein kinase activity,protein kinase binding,protein kinase regulator activity	1.02091e-13	273.405	287.552	280.172	280.717	266.709	277.711	257.561	274.4	315.958	293.94	283.686	285.109	0.974053	0.496477	-0.0379281	0.304101
O54962	Banf1	Mus musculus	Barrier-to-autointegration factor	condensed chromosome,cytoplasm,cytosol,nuclear envelope,nucleoplasm,nucleus	chromosome condensation,chromosome segregation,DNA integration,establishment of integrated proviral latency,negative regulation of viral genome replication	DNA binding,enzyme binding,identical protein binding,LEM domain binding,protein C-terminus binding,protein homodimerization activity,protein N-terminus binding	1.84813e-16	10542.3	7813.23	7782.23	16042.4	19649.7	12366	20724.1	16989.6	6978.95	8757.38	6172.69	11924.5	1.03702	0.90936	0.0524432	0.041264
O54983	Crym	Mus musculus	Ketimine reductase mu-crystallin	cytoplasm,cytosol,mitochondrion,nucleus	mitochondrial transport,negative regulation of transcription from RNA polymerase II promoter,sensory perception of sound,thyroid hormone metabolic process,thyroid hormone transport	hormone binding,NADP binding,protein homodimerization activity,thiomorpholine-carboxylate dehydrogenase activity,thyroid hormone binding,transcription corepressor activity	4.43142e-11	5479.75	4580.23	5314.57	5228.25	5082.39	5137.04	4783.21	4971.16	3835.67	4757.18	4905.29	4650.5	1.10462	0.096015	0.14355	1.01766
O54984	Get3	Mus musculus	ATPase GET3	GET complex,nucleolus,nucleoplasm	posttranslational protein targeting to membrane,tail-anchored membrane protein insertion into ER membrane	ATPase activity,ATP binding,metal ion binding	6.7511e-14	2258.2	1916.23	2310.95	2146.96	2009.49	2128.37	2157.31	2074.7	1888.93	2098.57	2127.3	2069.36	1.02851	0.520514	0.0405616	0.283567
O54988	Slk	Mus musculus	STE20-like serine/threonine-protein kinase	cell leading edge,cytoplasm,perinuclear region of cytoplasm	apoptotic process,cytoplasmic microtubule organization,positive regulation of apoptotic process,positive regulation of histone phosphorylation,protein autophosphorylation,protein phosphorylation,regulation of apoptotic process,regulation of cell migration,regulation of focal adhesion assembly	ATP binding,identical protein binding,protein homodimerization activity,protein kinase activity,protein serine/threonine kinase activity	3.06944e-12	978.41	1074.99	1000.24	1002.01	1008.95	1012.92	1002.87	926.538	965.914	1022.98	1034.28	990.519	1.02262	0.407968	0.0322633	0.389374
O54991	Cntnap1	Mus musculus	Contactin-associated protein 1	axon,integral component of membrane,myelin sheath,paranodal junction,paranode region of axon,plasma membrane,presynaptic active zone membrane,septate junction	cell adhesion,central nervous system myelination,cytoskeleton organization,myelination in peripheral nervous system,neuromuscular process controlling balance,neuromuscular process controlling posture,neuronal action potential propagation,neuron projection development,neuron projection morphogenesis,paranodal junction assembly,protein localization to juxtaparanode region of axon,protein localizati…	SH3 domain binding	1.04855e-13	1646.94	2232.33	1628.26	1276.79	1447.44	1646.35	1242.33	1435.56	1900.39	1939.12	1913.2	1686.12	0.976413	0.85909	-0.0344365	0.0659615
O55003	Bnip3	Mus musculus	BCL2/adenovirus E1B 19 kDa protein-interacting protein 3	cytoplasm,dendrite,endoplasmic reticulum,integral component of mitochondrial outer membrane,mitochondrial membrane,mitochondrial outer membrane,mitochondrion,nuclear envelope,nucleoplasm,nucleus,postsynaptic density	apoptotic process,autophagic cell death,brown fat cell differentiation,cardiac muscle cell apoptotic process,cell death,cellular response to cobalt ion,cellular response to hydrogen peroxide,cellular response to hypoxia,cellular response to mechanical stimulus,cerebral cortex development,defense response to virus,granzyme-mediated apoptotic signaling pathway,intrinsic apoptotic signaling pathway,…	GTPase binding,identical protein binding,protein homodimerization activity	3.50509e-15	91.1494	67.4599	33.516	86.1017	63.3876	68.3229	90.9036	33.4084	93.1369	67.8225	53.8458	67.8234	1.00736	0.974609	0.0105851	0.0111694
O55013	Trappc3	Mus musculus	Trafficking protein particle complex subunit 3	cis-Golgi network membrane,cytosol,endoplasmic reticulum,Golgi apparatus,Golgi membrane,TRAPP complex	ER to Golgi vesicle-mediated transport,intra-Golgi vesicle-mediated transport		2.4869e-11	1543.5	1285.32	1472.79	1445.92	1583.57	1466.22	1499.78	1592.74	1361.15	1432.86	1394.79	1456.27	1.00684	0.883649	0.00982772	0.0537202
O55017	Cacna1b	Mus musculus	Voltage-dependent N-type calcium channel subunit alpha-1B	axon terminus,dendrite,dendritic shaft,glutamatergic synapse,membrane,neuronal cell body,neuron projection,plasma membrane,macromolecular complex,Schaffer collateral - CA1 synapse,voltage-gated calcium channel complex	calcium ion import,calcium ion transmembrane transport,calcium ion transport,chemical synaptic transmission,locomotory behavior,modulation of synaptic transmission,neurotransmitter secretion,positive regulation of neurotransmitter secretion,regulation of blood pressure,regulation of calcium ion transport,regulation of heart contraction,regulation of ion transmembrane transport,response to beta-am…	ATP binding,calcium ion binding,high voltage-gated calcium channel activity,protein C-terminus binding,protein phosphatase 2A binding,voltage-gated calcium channel activity,voltage-gated calcium channel activity involved in positive regulation of presynaptic cytosolic calcium levels	1.13633e-11	227.665	228.883	162.47	124.834	122.036	173.178	128.793	117.13	219.121	233.378	240.795	187.844	0.921924	0.69195	-0.11728	0.159925
O55022	Pgrmc1	Mus musculus	Membrane-associated progesterone receptor component 1	cell body,endomembrane system,endoplasmic reticulum membrane,integral component of membrane,membrane,mitochondrial outer membrane,neuronal cell body,neuron projection,synapse	associative learning,heme biosynthetic process,memory,modification of synaptic structure,negative regulation of synapse organization,positive regulation of protein localization to plasma membrane	heme binding,metal ion binding,protein homodimerization activity,steroid binding	4.14892e-18	2590.39	2312.17	2926.49	2621.7	2570.96	2604.34	2417.29	2399.27	2329.88	2735.95	2300.22	2436.52	1.06888	0.216005	0.0960968	0.665536
O55023	Impa1	Mus musculus	Inositol monophosphatase 1	axon,cytoplasm,neuronal cell body	inositol biosynthetic process,inositol metabolic process,inositol phosphate dephosphorylation,phosphate-containing compound metabolic process,phosphatidylinositol biosynthetic process,phosphatidylinositol phosphorylation,signal transduction	identical protein binding,inositol monophosphate 1-phosphatase activity,inositol monophosphate 3-phosphatase activity,inositol monophosphate 4-phosphatase activity,inositol monophosphate phosphatase activity,lithium ion binding,magnesium ion binding,manganese ion binding,protein homodimerization activity	1.20597e-13	6874.75	6612.97	6985.06	7270.41	6876.68	6923.97	6967.39	7218.72	6637.05	6801.39	6446.41	6814.19	1.01611	0.53687	0.0230575	0.270131
O55026	Entpd2	Mus musculus	Ectonucleoside triphosphate diphosphohydrolase 2	basement membrane,cell body,cell projection membrane,cell surface,integral component of membrane,plasma membrane	cellular response to interleukin-6,G-protein coupled receptor signaling pathway,platelet activation,purine ribonucleoside diphosphate catabolic process	adenosine-diphosphatase activity,ATPase activity,ATP binding,identical protein binding,nucleoside-diphosphatase activity,nucleoside-triphosphatase activity	4.14826e-15	773.807	1111.17	708.931	533.385	595.783	744.616	428.394	544.352	758.302	907.139	792.301	686.098	1.08529	0.672168	0.118082	0.172522
O55028	Bckdk	Mus musculus	[3-methyl-2-oxobutanoate dehydrogenase [lipoamide]] kinase, mitochondrial	mitochondrial alpha-ketoglutarate dehydrogenase complex,mitochondrion	branched-chain amino acid catabolic process,glucose homeostasis,negative regulation of pyruvate dehydrogenase activity,phosphorylation	ATP binding,protein kinase activity,protein serine/threonine kinase activity	5.66673e-12	190.841	192.846	190.005	215.958	227.691	203.468	278.743	198.298	212.18	183.903	225.293	219.683	0.926188	0.395008	-0.110623	0.403395
O55029	Copb2	Mus musculus	Coatomer subunit beta'	COPI vesicle coat,cytosol,Golgi apparatus,Golgi membrane	ER to Golgi vesicle-mediated transport,intracellular protein transport,intra-Golgi vesicle-mediated transport,retrograde vesicle-mediated transport, Golgi to ER,toxin transport	protein kinase C binding,structural molecule activity	3.31325e-18	1302.54	1303.85	1340.73	1417.88	1347.8	1342.56	1322.61	1385.57	1323.75	1331.38	1380.33	1348.73	0.995429	0.813369	-0.00660961	0.0897124
O55033	Nck2	Mus musculus	Cytoplasmic protein NCK2	cytoplasm,cytosol,endoplasmic reticulum,postsynaptic density,synapse,vesicle membrane	actin filament organization,cell migration,dendritic spine development,ephrin receptor signaling pathway,immunological synapse formation,lamellipodium assembly,negative regulation of endoplasmic reticulum stress-induced eIF2 alpha phosphorylation,negative regulation of peptidyl-serine phosphorylation,negative regulation of PERK-mediated unfolded protein response,negative regulation of transcripti…	phosphotyrosine binding,macromolecular complex binding,scaffold protein binding	3.01552e-14	612.181	587.419	605.641	601.616	548.255	591.022	614.985	632.987	595.242	645.904	620.958	622.015	0.950173	0.0616718	-0.0737372	1.20991
O55042	Snca	Mus musculus	Alpha-synuclein	actin cytoskeleton,axon,axon terminus,cell cortex,cytoplasm,cytoplasmic vesicle membrane,cytoskeleton,cytosol,extracellular region,extracellular space,Golgi apparatus,growth cone,inclusion body,intracellular membrane-bounded organelle,membrane,mitochondrial inner membrane,mitochondrial intermembrane space,mitochondrial matrix,mitochondrial outer membrane,mitochondrion,neuronal cell body,nuclear o…	activation of cysteine-type endopeptidase activity involved in apoptotic process,adult locomotory behavior,aging,behavioral response to cocaine,cellular response to copper ion,cellular response to fibroblast growth factor stimulus,cellular response to oxidative stress,chemical synaptic transmission,dopamine biosynthetic process,dopamine metabolic process,excitatory postsynaptic potential,fatty ac…	actin binding,alpha-tubulin binding,arachidonic acid binding,beta-tubulin binding,calcium ion binding,copper ion binding,cuprous ion binding,cysteine-type endopeptidase inhibitor activity involved in apoptotic process,dynein complex binding,enzyme binding,ferrous iron binding,histone binding,Hsp70 protein binding,identical protein binding,kinesin binding,magnesium ion binding,microtubule binding,…	4.05168e-13	18984.1	13241.9	17024.8	17840.2	15472.2	16512.6	16039	17949.6	18266.3	16461.7	15661.3	16875.6	0.978493	0.755412	-0.0313668	0.121816
O55057	Pde6d	Mus musculus	Retinal rod rhodopsin-sensitive cGMP 3',5'-cyclic phosphodiesterase subunit delta	cell projection,cytoplasmic vesicle,cytoplasmic vesicle membrane,cytoskeleton,cytosol	phototransduction,visual perception	3',5'-cyclic-GMP phosphodiesterase activity,GTPase inhibitor activity,Rab GTPase binding	1.76072e-13	334.338	315.353	303.569	314.968	330.245	319.695	328.052	267.524	315.099	336.341	288.086	307.021	1.04128	0.391348	0.0583586	0.407437
O55060	Tpmt	Mus musculus	Thiopurine S-methyltransferase	cytoplasm	drug metabolic process,methylation	S-adenosyl-L-methionine binding,thiopurine S-methyltransferase activity	1.89665e-08	456.874	489.361	501.739	554.339	476.523	495.767	506.905	397.615	442.187	413.865	462.31	444.577	1.11514	0.0771048	0.157231	1.11292
O55074;Q7TN79	Akap7	Mus musculus	A-kinase anchor protein 7 isoform alpha;A-kinase anchor protein 7 isoform gamma	apical plasma membrane,cytosol,exocytic vesicle,hippocampal mossy fiber to CA3 synapse,lateral plasma membrane,membrane,nucleus,macromolecular complex,sarcoplasmic reticulum,T-tubule;apical plasma membrane,cytoplasm,cytosol,exocytic vesicle,hippocampal mossy fiber to CA3 synapse,lateral plasma membrane,membrane,nucleus,macromolecular complex,sarcoplasmic reticulum,T-tubule	cellular response to cAMP,modulation of synaptic transmission,positive regulation of delayed rectifier potassium channel activity,positive regulation of potassium ion transmembrane transport,protein localization,regulation of membrane repolarization,regulation of protein kinase A signaling,transmembrane receptor protein serine/threonine kinase signaling pathway;cellular response to cAMP,modulatio…	AMP binding,protein C-terminus binding,protein domain specific binding,protein kinase A binding,protein kinase A regulatory subunit binding,protein kinase binding;AMP binding,protein C-terminus binding,protein domain specific binding,protein kinase A binding,protein kinase A regulatory subunit binding,protein kinase binding	1.72943e-12	902.527	802.154	785.116	634.981	576.206	740.197	610.528	628.115	815.019	711.765	678.631	688.811	1.0746	0.48068	0.1038	0.318144
O55091	Impact	Mus musculus	Protein IMPACT	cytoplasm,polysome	cellular response to acidic pH,cellular response to amino acid starvation,cellular response to benomyl,cellular response to glucose starvation,cellular response to hydrogen peroxide,cellular response to leucine starvation,cellular response to UV-C,negative regulation of cell death,negative regulation of protein autophosphorylation,negative regulation of protein complex assembly,negative regulatio…	actin binding,polysome binding,protein kinase inhibitor activity,ribosome binding	3.12971e-13	1961.62	1994.5	2030.93	1993.35	2197.53	2035.59	2111.53	1879.09	1776.71	1872.71	1786.96	1885.4	1.07966	0.0752663	0.110574	1.1234
O55100	Syngr1	Mus musculus	Synaptogyrin-1	integral component of synaptic vesicle membrane,melanosome,neuromuscular junction,synaptic vesicle,synaptic vesicle membrane	cellular response to leukemia inhibitory factor,protein targeting,regulated exocytosis,regulation of long-term neuronal synaptic plasticity,regulation of short-term neuronal synaptic plasticity,synaptic vesicle membrane organization		1.64553e-10	7689.67	8138.11	7477.52	5868.85	5586.6	6952.15	4331.72	6093.29	7412.63	6952.11	6883.98	6334.75	1.09746	0.432859	0.134173	0.363653
O55102	Bloc1s1	Mus musculus	Biogenesis of lysosome-related organelles complex 1 subunit 1	axon cytoplasm,BLOC-1 complex,BORC complex,cytosol,early endosome,lysosomal membrane,mitochondrial intermembrane space,mitochondrial matrix,mitochondrion	aerobic respiration,anterograde axonal transport,anterograde synaptic vesicle transport,endosomal transport,lysosome localization,neuron projection development,peptidyl-lysine acetylation		1.22458e-11	439.599	294.213	383.284	393.942	392.614	380.73	370.56	420.075	358.978	344.062	298.626	358.46	1.06213	0.490582	0.0869569	0.309289
O55106	Strn	Mus musculus	Striatin	bicellular tight junction,cytoplasm,dendrite,dendritic spine,FAR/SIN/STRIPAK complex,membrane,neuronal cell body,postsynaptic density,postsynaptic membrane,macromolecular complex	dendrite development,locomotory behavior,negative regulation of cell proliferation,Wnt signaling pathway	armadillo repeat domain binding,calmodulin binding,estrogen receptor binding,macromolecular complex binding,protein domain specific binding,protein phosphatase 2A binding	1.25867e-14	2272.9	1922.43	2122.6	2152.94	2082.3	2110.63	2085.37	2124.51	2032.53	2062.4	2109.65	2082.89	1.01332	0.651398	0.0190884	0.186153
O55125	Nipsnap1	Mus musculus	Protein NipSnap homolog 1	membrane,mitochondrial inner membrane,mitochondrion,synaptic membrane	sensory perception of pain	neurotransmitter binding	5.23853e-15	7017.5	6906.62	7026.37	6491.57	7299.16	6948.24	6745.51	6985	6775.35	7062.06	6241.16	6761.81	1.02757	0.365635	0.039238	0.436953
O55126	Nipsnap2	Mus musculus	Protein NipSnap homolog 2	cytoplasm,mitochondrial outer membrane,mitochondrion	mitochondrion organization,oxidative phosphorylation,positive regulation of high voltage-gated calcium channel activity		1.63825e-14	2959.17	2618.88	2959.61	2913.18	2981.1	2886.39	2972.8	3130.16	2802.26	2806.34	2825.1	2907.33	0.992797	0.827907	-0.0104295	0.0820185
O55128	Sap18	Mus musculus	Histone deacetylase complex subunit SAP18	ASAP complex,cytosol,histone deacetylase complex,nuclear body,nuclear speck,nucleoplasm,transcription factor complex	mRNA processing,negative regulation of mRNA splicing, via spliceosome,positive regulation of apoptotic process,regulation of alternative mRNA splicing, via spliceosome,regulation of transcription, DNA-templated,RNA splicing		1.83075e-10	980.417	640.997	799.219	811.523	879.123	822.256	728.382	751.206	1012.59	988.486	776.051	851.343	0.965833	0.734675	-0.0501538	0.133905
O55131	Septin7	Mus musculus	Septin-7	axoneme,axon terminus,cell body,cell cortex,cell division site,cleavage furrow,condensed chromosome kinetochore,glutamatergic synapse,membrane,microtubule cytoskeleton,midbody,myelin sheath,neuron projection,non-motile cilium,nucleus,macromolecular complex,septin complex,septin cytoskeleton,septin filament array,septin ring,sperm annulus,spindle,stress fiber,synapse	cellular protein localization,cilium morphogenesis,collateral sprouting,cortical cytoskeleton organization,cytoskeleton-dependent cytokinesis,dendritic spine morphogenesis,mitotic cytokinesis,positive regulation of nonmotile primary cilium assembly,postsynapse organization,pseudopodium retraction,regulation of embryonic cell shape,spermatogenesis	GTPase activity,GTP binding,identical protein binding,binding, bridging	5.40343e-16	11659.7	12571.8	11860.8	12184.5	12125.7	12080.5	11915.6	11796	12619.4	12671	12877.1	12375.8	0.976136	0.300753	-0.0348457	0.52179
O55135	Eif6	Mus musculus	Eukaryotic translation initiation factor 6	cytoplasm,cytosol,intermediate filament,lamin filament,nucleolus,nucleoplasm,nucleus,preribosome, large subunit precursor	assembly of large subunit precursor of preribosome,gene silencing by miRNA,maturation of 5.8S rRNA,maturation of LSU-rRNA,mature ribosome assembly,miRNA mediated inhibition of translation,positive regulation of translation,regulation of fatty acid biosynthetic process,regulation of glycolytic process,regulation of megakaryocyte differentiation,regulation of reactive oxygen species metabolic proce…	ribosomal large subunit binding,ribosome binding,translation initiation factor activity	1.11681e-08	1011.61	865.59	946.957	1010.91	857.542	938.522	1036.15	941.207	812.261	780.931	893.735	892.857	1.05114	0.444312	0.0719607	0.352312
O55137	Acot1	Mus musculus	Acyl-coenzyme A thioesterase 1	cytoplasm,cytosol,mitochondrion	acyl-CoA metabolic process,fatty acid metabolic process,long-chain fatty acid metabolic process,negative regulation of cardiac muscle cell apoptotic process	acyl-CoA hydrolase activity,carboxylic ester hydrolase activity,myristoyl-CoA hydrolase activity,palmitoyl-CoA hydrolase activity	1.90239e-16	250.655	231.434	255.479	183.911	233.239	230.943	216.04	181.789	170.758	215.91	252.782	207.456	1.11322	0.257214	0.154736	0.589705
O55142	Rpl35a	Mus musculus	60S ribosomal protein L35a	cytosolic large ribosomal subunit,mitochondrion	cytoplasmic translation,ribosomal large subunit biogenesis,rRNA processing	ribonucleoprotein complex binding,structural constituent of ribosome	4.0639e-11	1219.02	1364.25	958.703	1276.58	1418.39	1247.39	1462.01	1043.85	971.851	1291.85	1105.16	1174.94	1.06166	0.562274	0.0863195	0.250052
O55143	Atp2a2	Mus musculus	Sarcoplasmic/endoplasmic reticulum calcium ATPase 2	apical ectoplasmic specialization,calcium ion-transporting ATPase complex,endoplasmic reticulum,endoplasmic reticulum membrane,extrinsic component of cytoplasmic side of plasma membrane,longitudinal sarcoplasmic reticulum,membrane,perinuclear region of cytoplasm,plasma membrane bounded cell projection,macromolecular complex,ribbon synapse,sarcoplasmic reticulum,sarcoplasmic reticulum membrane,ves…	calcium ion import into sarcoplasmic reticulum,calcium ion transmembrane transport,calcium ion transport,calcium ion transport from cytosol to endoplasmic reticulum,cardiac muscle hypertrophy in response to stress,cellular calcium ion homeostasis,cellular response to heat,cellular response to oxidative stress,endoplasmic reticulum calcium ion homeostasis,ER-nucleus signaling pathway,negative regu…	ATPase activity,ATP binding,calcium ion binding,calcium-transporting ATPase activity,calcium-transporting ATPase activity involved in regulation of cardiac muscle cell membrane potential,enzyme binding,ion channel binding,lutropin-choriogonadotropic hormone receptor binding,protein C-terminus binding,hydrogen-exporting ATPase activity, phosphorylative mechanism,S100 protein binding	8.88688e-21	2573.8	3295.13	2227.55	1750.09	1951.34	2359.58	1409.31	2121.6	2732.58	2739.43	2714.1	2343.41	1.0069	0.966832	0.00992557	0.0146488
O55176	Pja1	Mus musculus	E3 ubiquitin-protein ligase Praja-1	cytoplasm	protein catabolic process	metal ion binding,ubiquitin protein ligase activity	2.24732e-05	16.2746	21.4514	9.85512	22.5527	20.8078	18.1883	18.9139	13.9014	16.3425	4.86525	18.6862	14.5419	1.25076	0.326306	0.3228	0.486375
O55186	Cd59a	Mus musculus	CD59A glycoprotein	anchored component of membrane,cell surface,external side of plasma membrane,plasma membrane	negative regulation of activation of membrane attack complex,negative regulation of angiogenesis,negative regulation of complement activation,negative regulation of fibroblast growth factor production,negative regulation of vascular endothelial growth factor receptor signaling pathway,regulation of complement activation,regulation of complement-dependent cytotoxicity	complement binding	6.18165e-17	356.884	86.1076	213.546	67.2299	90.6494	162.883	77.7486	143.806	175.158	345.473	392.183	226.874	0.717947	0.456329	-0.47805	0.340722
O55192	Slc6a2	Mus musculus	Sodium-dependent noradrenaline transporter	cell surface,integral component of plasma membrane,membrane raft,neuronal cell body membrane,neuron projection,plasma membrane,presynaptic membrane	dopamine uptake involved in synaptic transmission,monoamine transport,neurotransmitter transport,norepinephrine transport,norepinephrine uptake,response to drug,response to pain	actin binding,alpha-tubulin binding,beta-tubulin binding,dopamine:sodium symporter activity,metal ion binding,monoamine transmembrane transporter activity,neurotransmitter:sodium symporter activity,neurotransmitter transporter activity,norepinephrine:sodium symporter activity	3.36933e-06	21.1976	44.5571	32.9737	20.1043	33.9553	30.5576	14.0982	31.4318	32.1598	30.1894	29.2206	27.42	1.11443	0.593494	0.156305	0.226584
O55201	Supt5h	Mus musculus	Transcription elongation factor SPT5	DSIF complex,nucleoplasm,nucleus	negative regulation of DNA-templated transcription, elongation,negative regulation of mRNA polyadenylation,negative regulation of transcription from RNA polymerase II promoter,positive regulation of DNA-templated transcription, elongation,positive regulation of macroautophagy,positive regulation of transcription from RNA polymerase II promoter,regulation of transcription from RNA polymerase II pr…	chromatin binding,enzyme binding,mRNA binding,protein heterodimerization activity	1.35106e-07	346.938	347.697	361.346	315.39	331.203	340.515	355.4	358.537	333.297	334.439	378.809	352.096	0.967107	0.34602	-0.0482531	0.460898
O55222	Ilk	Mus musculus	Integrin-linked protein kinase	axon,cell-cell junction,cell junction,costamere,cytoplasm,cytosol,dendritic shaft,focal adhesion,lamellipodium,neuronal cell body,nucleoplasm,plasma membrane,macromolecular complex,sarcomere,stress fiber,terminal bouton	branching involved in ureteric bud morphogenesis,cell aging,cell cycle arrest,cell-matrix adhesion,cell projection organization,establishment or maintenance of epithelial cell apical/basal polarity,fibroblast migration,integrin-mediated signaling pathway,myelin assembly,myelination in peripheral nervous system,negative regulation of apoptotic process,negative regulation of cardiac muscle cell apo…	ATP binding,integrin binding,macromolecular complex binding,protein domain specific binding,protein kinase activity,protein kinase binding,protein serine/threonine kinase activity,SH3 domain binding	9.00832e-10	1317.58	1443.41	1389.05	1505.33	1551.53	1441.38	1460.48	1341.34	1381.04	1581.04	1321.32	1417.04	1.01717	0.709164	0.0245654	0.149253
O55229	Chkb	Mus musculus	Choline/ethanolamine kinase		muscle organ development,phosphatidylcholine biosynthetic process,phosphatidylethanolamine biosynthetic process	ATP binding,choline kinase activity,ethanolamine kinase activity	5.16329e-11	391.535	345.395	393.777	323.913	376.301	366.184	357.599	434.292	409.877	368.533	407.191	395.499	0.925879	0.17445	-0.111104	0.758328
O55234	Psmb5	Mus musculus	Proteasome subunit beta type-5	centrosome,cytoplasm,cytosol,nucleoplasm,nucleus,proteasome complex,proteasome core complex,proteasome core complex, beta-subunit complex	proteasomal protein catabolic process,proteasomal ubiquitin-independent protein catabolic process,proteasome-mediated ubiquitin-dependent protein catabolic process,proteolysis,response to oxidative stress	endopeptidase activity,peptidase activity,threonine-type endopeptidase activity	6.41733e-14	2438.91	2441.34	2491.35	2491.41	2648.08	2502.22	2566.14	2421.07	2491.12	2614.47	2663.62	2551.28	0.980769	0.420007	-0.0280153	0.376744
O55242	Sigmar1	Mus musculus	Sigma non-opioid intracellular receptor 1	cytoplasmic vesicle,endoplasmic reticulum,endoplasmic reticulum membrane,growth cone,integral component of membrane,lipid particle,nuclear envelope,nuclear inner membrane,nuclear outer membrane,postsynaptic density,postsynaptic density membrane	cell death in response to hydrogen peroxide,lipid transport,nervous system development,protein homotrimerization,regulation of neuron apoptotic process	identical protein binding,opioid receptor activity,signaling receptor activity	6.87902e-05	441.305	543.201	526.088	450.505	528.268	497.873	437.733	394.482	320.858	470.329	431.933	411.067	1.21117	0.0316044	0.276406	1.50025
O70133	Dhx9	Mus musculus	ATP-dependent RNA helicase A	actin cytoskeleton,centrosome,CRD-mediated mRNA stability complex,cytoplasm,cytoplasmic ribonucleoprotein granule,nuclear body,nuclear stress granule,nucleolus,nucleoplasm,nucleus,perichromatin fibrils,polysomal ribosome,polysome,macromolecular complex,ribonucleoprotein complex,RISC complex,RISC-loading complex	alternative mRNA splicing, via spliceosome,cellular macromolecular complex assembly,cellular response to exogenous dsRNA,cellular response to heat,cellular response to tumor necrosis factor,circadian rhythm,CRD-mediated mRNA stabilization,DNA duplex unwinding,DNA-templated transcription, termination,DNA-templated viral transcription,G-quadruplex DNA unwinding,inflammatory response,innate immune r…	3'-5' DNA/RNA helicase activity,3'-5' DNA helicase activity,3'-5' RNA helicase activity,ATPase activity,ATP binding,chromatin DNA binding,DNA binding,DNA helicase activity,DNA replication origin binding,double-stranded DNA binding,double-stranded RNA binding,importin-alpha family protein binding,metal ion binding,mRNA binding,nucleoside-triphosphatase activity,nucleoside-triphosphate diphosphatas…	1.71894e-16	1296.93	1470.65	1398.41	1203.98	1217.14	1317.42	1141.26	1295.75	1413.78	1482.13	1527.51	1372.09	0.960161	0.546166	-0.0586522	0.262676
O70139	Pkig	Mus musculus	cAMP-dependent protein kinase inhibitor gamma	cytoplasm,nucleus	negative regulation of cAMP-dependent protein kinase activity,negative regulation of protein import into nucleus,negative regulation of protein kinase activity,negative regulation of transcription from RNA polymerase II promoter,signal transduction	cAMP-dependent protein kinase inhibitor activity	1.68645e-10	920.877	601.376	850.283	874.896	741.754	797.837	743.517	880.176	594.283	541.974	587.662	669.522	1.19165	0.169	0.252962	0.772112
O70152	Dpm1	Mus musculus	Dolichol-phosphate mannosyltransferase subunit 1	dolichol-phosphate-mannose synthase complex,endoplasmic reticulum,endoplasmic reticulum membrane,intracellular membrane-bounded organelle,membrane	dolichol metabolic process,GDP-mannose metabolic process,GPI anchor biosynthetic process,protein mannosylation,protein O-linked mannosylation	alcohol binding,dolichyl-phosphate beta-D-mannosyltransferase activity,dolichyl-phosphate-mannose-protein mannosyltransferase activity,mannose binding	2.61763e-16	454.6	431.44	426.167	416.55	459.589	437.669	421.647	380.771	506.315	454.456	483.142	449.266	0.974187	0.638247	-0.0377296	0.195011
O70161	Pip5k1c	Mus musculus	Phosphatidylinositol 4-phosphate 5-kinase type-1 gamma	adherens junction,cytosol,endosome membrane,focal adhesion,glutamatergic synapse,nucleoplasm,phagocytic cup,postsynaptic density,presynaptic endocytic zone membrane,ruffle membrane,uropod	axonogenesis,chemotaxis,endocytosis,exocytosis,phagocytosis,phosphatidylinositol biosynthetic process,phosphatidylinositol metabolic process,platelet aggregation,regulation of synaptic vesicle endocytosis	1-phosphatidylinositol-4-phosphate 5-kinase activity,ATP binding,talin binding	7.40444e-16	2594.23	2640.58	2726.51	2790.7	2784.23	2707.25	2696.83	2605.86	2673.53	2625.85	2675.42	2655.5	1.01949	0.258806	0.0278456	0.587026
O70166	Stmn3	Mus musculus	Stathmin-3	cytoplasm,cytosol,Golgi apparatus,growth cone,neuron projection,perinuclear region of cytoplasm	blastocyst hatching,cytoplasmic microtubule organization,microtubule depolymerization,negative regulation of Rac protein signal transduction,neuron projection development,regulation of cytoskeleton organization,regulation of GTPase activity,regulation of microtubule polymerization or depolymerization	protein C-terminus binding,protein domain specific binding,tubulin binding	1.4598e-06	212.579	261.849	204.651	243.629	213.215	227.185	234.741	185.51	223.912	189.082	195.692	205.788	1.10398	0.184751	0.142708	0.733414
O70172	Pip4k2a	Mus musculus	Phosphatidylinositol 5-phosphate 4-kinase type-2 alpha	autophagosome,nucleus,plasma membrane	megakaryocyte development,positive regulation of autophagosome assembly,regulation of autophagy	1-phosphatidylinositol-5-phosphate 4-kinase activity,ATP binding	1.38289e-14	1307.77	1462.67	1478.25	1480.42	1444.73	1434.77	1475.18	1543.25	1467.8	1516.1	1413.92	1483.25	0.967314	0.251518	-0.0479444	0.599431
O70194	Eif3d	Mus musculus	Eukaryotic translation initiation factor 3 subunit D	eukaryotic 43S preinitiation complex,eukaryotic 48S preinitiation complex,eukaryotic translation initiation factor 3 complex,eukaryotic translation initiation factor 3 complex, eIF3m	cap-dependent translational initiation,formation of cytoplasmic translation initiation complex,IRES-dependent viral translational initiation,positive regulation of mRNA binding,positive regulation of translation,translational initiation,viral translational termination-reinitiation	mRNA cap binding,RNA binding,translation initiation factor activity	1.92769e-16	928.769	872.098	1025.36	894.798	966.493	937.503	958.773	931.404	948.299	997.246	984.123	963.969	0.972545	0.398132	-0.0401631	0.399973
O70200	Aif1	Mus musculus	Allograft inflammatory factor 1	actin filament,cell projection,cytoplasm,cytosol,lamellipodium,nucleus,perikaryon,perinuclear region of cytoplasm,phagocytic cup,ruffle,ruffle membrane	actin crosslink formation,actin filament bundle assembly,actin filament polymerization,cellular response to extracellular stimulus,cellular response to hormone stimulus,cellular response to hydroperoxide,cellular response to interferon-gamma,cellular response to morphine,cellular response to oxidative stress,cerebellum development,inflammatory response,microglial cell activation,negative regulati…	actin filament binding,calcium ion binding	1.14233e-05	213.201	55.6938	153.561	NaN	115.036	134.373	82.076	110.679	128.695	175.444	121.048	123.588	1.08726	0.758891	0.120702	0.119821
O70209	Pdlim3	Mus musculus	PDZ and LIM domain protein 3	actin cytoskeleton,adherens junction,cytosol,filamentous actin,stress fiber,Z disc	actin cytoskeleton organization,actin filament organization,heart development,muscle structure development	actin binding,cytoskeletal protein binding,metal ion binding,muscle alpha-actinin binding,structural constituent of muscle	0.00822625	51.912	NaN	NaN	NaN	NaN	51.912	NaN	NaN	NaN	60.8216	53.1092	56.9654	0.91129	#DIV/0!	-0.134018	#DIV/0!
O70228	Atp9a	Mus musculus	Probable phospholipid-transporting ATPase IIA	early endosome,early endosome membrane,endosome,integral component of membrane,perinuclear region of cytoplasm,plasma membrane,recycling endosome,trans-Golgi network	endocytosis,phospholipid translocation,retrograde vesicle-mediated transport, Golgi to ER	ATPase-coupled intramembrane lipid transporter activity,ATP binding,magnesium ion binding,protease binding	6.33022e-09	181.685	203.662	164.876	113.461	132.586	159.254	91.0356	125.512	203.398	157.657	153.704	146.261	1.08883	0.613756	0.122783	0.212004
O70250	Pgam2	Mus musculus	Phosphoglycerate mutase 2	cytosol,nucleus	gluconeogenesis,glycolytic process,Notch signaling pathway,response to inorganic substance,response to mercury ion,spermatogenesis,striated muscle contraction	2,3-bisphosphoglycerate-dependent phosphoglycerate mutase activity,bisphosphoglycerate mutase activity,hydrolase activity,identical protein binding,phosphoglycerate mutase activity	2.00527e-13	301.541	238.43	283.565	348.009	280.668	290.443	351.755	293.196	264.988	298.581	260.504	293.805	0.988555	0.89244	-0.0166061	0.0494208
O70251	Eef1b	Mus musculus	Elongation factor 1-beta	cytoplasm,cytosol,endoplasmic reticulum,eukaryotic translation elongation factor 1 complex	response to ethanol,translational elongation	guanyl-nucleotide exchange factor activity,translation elongation factor activity	8.57956e-12	6510.59	5709.47	6042.27	6500.9	5805.54	6113.75	5881.69	5646.63	5331.6	6008.99	5894.69	5752.72	1.06276	0.120217	0.0878133	0.920033
O70252	Hmox2	Mus musculus	Heme oxygenase 2	endoplasmic reticulum,plasma membrane	heme catabolic process,heme oxidation,iron ion homeostasis,response to hypoxia,response to oxidative stress	heme binding,heme oxygenase (decyclizing) activity,metal ion binding	5.04116e-15	1559.63	1271.93	1545.27	1448.21	1371.99	1439.41	1366.5	1432.62	1403.31	1367.66	1321.3	1378.28	1.04435	0.316278	0.0626095	0.499931
O70274	Ptp4a2	Mus musculus	Protein tyrosine phosphatase type IVA 2	cytoplasm,early endosome,nucleus,plasma membrane		protein tyrosine phosphatase activity	0.000191895	73.1116	11.4097	87.0187	58.1869	92.3564	64.4166	62.7059	89.8545	73.5861	74.0763	NaN	75.0557	0.858251	0.555307	-0.220529	0.255467
O70293	Grk6	Mus musculus	G protein-coupled receptor kinase 6	cytosol,plasma membrane	desensitization of G-protein coupled receptor protein signaling pathway,negative regulation of anion channel activity,protein phosphorylation,Wnt signaling pathway	ATP binding,beta-adrenergic receptor kinase activity,G-protein coupled receptor kinase activity,protein kinase activity	4.99577e-12	199.84	252.122	195.073	189.904	205.582	208.504	189.167	195.784	260.521	254.068	219.393	223.787	0.93171	0.430622	-0.102047	0.365904
O70305	Atxn2	Mus musculus	Ataxin-2	cytoplasm,cytoplasmic stress granule,cytosol,Golgi apparatus,perinuclear region of cytoplasm,polysome,ribonucleoprotein complex,trans-Golgi network	cerebellar Purkinje cell differentiation,cytoplasmic mRNA processing body assembly,homeostasis of number of cells,negative regulation of multicellular organism growth,negative regulation of receptor internalization,neuromuscular process,neuron projection morphogenesis,regulation of cytoplasmic mRNA processing body assembly,stress granule assembly	epidermal growth factor receptor binding,protein C-terminus binding,RNA binding	7.57502e-10	447.638	522.234	494.47	473.014	477.666	483.004	436.605	397.433	481.081	504.116	499.952	463.837	1.04132	0.445743	0.0584178	0.350915
O70310	Nmt1	Mus musculus	Glycylpeptide N-tetradecanoyltransferase 1	cytoplasm,cytosol,extrinsic component of membrane,plasma membrane	cellular ketone metabolic process,in utero embryonic development,N-terminal peptidyl-glycine N-myristoylation,N-terminal protein myristoylation	glycylpeptide N-tetradecanoyltransferase activity,myristoyltransferase activity	6.33077e-12	841.101	889.703	853.668	969.103	813.24	873.363	854.798	864.931	784.073	917.924	816.77	847.699	1.03027	0.48657	0.0430291	0.312855
O70311	Nmt2	Mus musculus	Glycylpeptide N-tetradecanoyltransferase 2	cytoplasm,cytosol,extrinsic component of membrane,Golgi apparatus,plasma membrane	N-terminal peptidyl-glycine N-myristoylation,N-terminal protein myristoylation	glycylpeptide N-tetradecanoyltransferase activity	3.15651e-14	293.233	385.381	281.162	330.426	305.73	319.186	306.143	311.741	379.994	351.348	340.6	337.965	0.944436	0.435384	-0.0824752	0.361128
O70318	Epb41l2	Mus musculus	Band 4.1-like protein 2	actin cytoskeleton,cell cortex region,cell junction,COP9 signalosome,cytoskeleton,nucleoplasm,plasma membrane	actin cytoskeleton organization,actomyosin structure organization,cell cycle,cell division,cortical actin cytoskeleton organization,positive regulation of protein localization to cell cortex,regulation of cell shape	actin binding,PH domain binding,spectrin binding,structural molecule activity	2.75869e-14	2458.81	2691.45	2761.58	2673.21	2818.61	2680.73	2607.21	2571.12	2713.52	2765.36	2758.79	2683.2	0.999081	0.973898	-0.00132624	0.0114864
O70325	Gpx4	Mus musculus	Phospholipid hydroperoxide glutathione peroxidase	cytosol,mitochondrial inner membrane,mitochondrion,nuclear envelope,nucleoplasm,nucleus,macromolecular complex	aging,arachidonic acid metabolic process,chromatin organization,glutathione metabolic process,lipoxygenase pathway,multicellular organism development,negative regulation of ferroptosis,protein polymerization,regulation of inflammatory response,response to estradiol,response to oxidative stress,spermatogenesis	glutathione peroxidase activity,identical protein binding,peroxidase activity,phospholipid-hydroperoxide glutathione peroxidase activity,selenium binding	9.22394e-16	3104.64	2885.63	3071.81	3243.43	3178.77	3096.86	3299.15	3192.26	3118.6	3158.04	3151.88	3183.99	0.972635	0.236722	-0.0400299	0.625762
O70340	Nptx2	Mus musculus	Neuronal pentraxin-2	extracellular region,extrinsic component of postsynaptic specialization membrane,glutamatergic synapse	associative learning,neurotransmitter receptor localization to postsynaptic specialization membrane,regulation of postsynaptic neurotransmitter receptor activity	carbohydrate binding,metal ion binding	0.000242151	343.605	303.243	296.386	346.932	232.833	304.6	NaN	273.037	370.122	347.25	334.793	331.301	0.919406	0.398186	-0.121226	0.399914
O70354	Ca11	Mus musculus	Carbonic anhydrase-related protein 11	basolateral plasma membrane,extracellular region	one-carbon metabolic process	hydro-lyase activity,zinc ion binding	8.00257e-07	267.481	347.981	299.298	180.155	162.677	251.519	189.723	189.332	322.773	285.513	156.994	228.867	1.09897	0.646171	0.136157	0.189652
O70362	Gpld1	Mus musculus	Phosphatidylinositol-glycan-specific phospholipase D	cytoplasm,extracellular matrix,extracellular region,extracellular space,high-density lipoprotein particle,intracellular membrane-bounded organelle	cell migration involved in sprouting angiogenesis,cellular response to calcium ion,cellular response to cholesterol,cellular response to drug,cellular response to inorganic substance,cellular response to insulin stimulus,cellular response to iron(II) ion,cellular response to pH,cellular response to triglyceride,chondrocyte differentiation,complement receptor mediated signaling pathway,GPI anchor …	glycosylphosphatidylinositol phospholipase D activity,phospholipase D activity,sodium channel regulator activity	3.57435e-06	323.807	304.626	387.202	270.017	303.413	317.813	272.888	289.775	188.256	212.258	159.275	224.49	1.41571	0.018056	0.501525	1.74338
O70370	Ctss	Mus musculus	Cathepsin S	cell surface,early endosome lumen,extracellular space,intracellular membrane-bounded organelle,late endosome,lysosome,membrane,phagocytic vesicle	antigen processing and presentation of exogenous peptide antigen via MHC class II,antigen processing and presentation of peptide antigen,basement membrane disassembly,bone resorption,collagen catabolic process,immune response,positive regulation of cation channel activity,positive regulation of inflammatory response,protein processing,proteolysis,proteolysis involved in cellular protein catabolic…	collagen binding,cysteine-type endopeptidase activity,cysteine-type peptidase activity,fibronectin binding,laminin binding,peptidase activity,proteoglycan binding	1.94619e-10	408.08	316.988	374.691	303.945	327.496	346.24	363.781	344.152	343.938	527.213	444.521	404.721	0.855504	0.189447	-0.225154	0.722513
O70378	Emc8	Mus musculus	ER membrane protein complex subunit 8	cytoplasm,cytosol,ER membrane protein complex,mitochondrion			7.78271e-13	879.746	689.226	829.96	936.458	824.919	832.062	807.312	908.349	755.446	683.618	728.932	776.731	1.07124	0.354149	0.0992751	0.450814
O70400	Pdlim1	Mus musculus	PDZ and LIM domain protein 1	actin cytoskeleton,adherens junction,cytoplasm,cytoskeleton,filamentous actin,stress fiber,transcription factor complex,Z disc	actin cytoskeleton organization,establishment or maintenance of actin cytoskeleton polarity,fibroblast migration,heart development,maintenance of cell polarity,muscle structure development,regulation of transcription from RNA polymerase II promoter,response to hypoxia,stress fiber assembly	actin binding,metal ion binding,muscle alpha-actinin binding,transcription coactivator activity	5.95538e-16	769.278	649.165	722.84	820.678	785.125	749.417	821.872	786.298	841.677	706.489	734.994	778.266	0.962931	0.481277	-0.054495	0.317605
O70423	Aoc3	Mus musculus	Membrane primary amine oxidase	cell surface,cytoplasm,early endosome,endoplasmic reticulum,extracellular space,Golgi apparatus,integral component of membrane,intracellular membrane-bounded organelle,microvillus,plasma membrane	amine metabolic process,cell adhesion,eating behavior,leukocyte migration involved in inflammatory response,negative regulation of primary amine oxidase activity,positive regulation of acute inflammatory response,positive regulation of glucose transport,positive regulation of leukocyte migration,regulation of blood pressure,response to antibiotic,response to immobilization stress	aliphatic-amine oxidase activity,aminoacetone:oxygen oxidoreductase(deaminating) activity,calcium ion binding,copper ion binding,identical protein binding,phenethylamine:oxygen oxidoreductase (deaminating) activity,primary amine oxidase activity,protein heterodimerization activity,quinone binding,tryptamine:oxygen oxidoreductase (deaminating) activity	2.18539e-05	73.9875	137.898	135.424	116.525	113.973	115.561	138.064	127.533	101.611	182.904	137.047	137.432	0.840863	0.24493	-0.250057	0.610959
O70433	Fhl2	Mus musculus	Four and a half LIM domains protein 2	M band,nucleus,Z disc	atrial cardiac muscle cell development,heart trabecula formation,negative regulation of apoptotic process,negative regulation of calcineurin-NFAT signaling cascade,negative regulation of transcription from RNA polymerase II promoter,osteoblast differentiation,regulation of transcription from RNA polymerase II promoter,response to hormone,ventricular cardiac muscle cell development	bHLH transcription factor binding,identical protein binding,metal ion binding,transcription cofactor activity,transcription corepressor activity,transcription factor binding	9.97227e-11	593.743	517.906	471.174	534.536	476.811	518.834	482.752	574.568	582.469	527.386	518.882	537.211	0.965791	0.543007	-0.0502165	0.265194
O70435	Psma3	Mus musculus	Proteasome subunit alpha type-3	cytoplasm,cytosol,nucleoplasm,nucleus,proteasome complex,proteasome core complex,proteasome core complex, alpha-subunit complex,synapse	proteasomal protein catabolic process,proteasomal ubiquitin-independent protein catabolic process,proteasome-mediated ubiquitin-dependent protein catabolic process,regulation of endopeptidase activity	endopeptidase activity,threonine-type endopeptidase activity,ubiquitin protein ligase binding	6.61794e-12	3580.46	3566.57	3481.75	3837.54	3803.44	3653.95	3958.24	3839.75	3364.39	3803.82	3752.55	3743.75	0.976014	0.48547	-0.035026	0.313837
O70439	Stx7	Mus musculus	Syntaxin-7	azurophil granule,early endosome,early endosome membrane,endocytic vesicle,endomembrane system,endosome,immunological synapse,integral component of membrane,integral component of synaptic vesicle membrane,late endosome,late endosome membrane,lysosomal membrane,lysosome,perinuclear region of cytoplasm,plasma membrane,recycling endosome,SNARE complex,synaptic vesicle,tertiary granule,vesicle	intracellular protein transport,organelle assembly,organelle localization,positive regulation of receptor localization to synapse,positive regulation of T cell mediated cytotoxicity,regulation of protein localization to plasma membrane,vesicle docking,vesicle fusion	chloride channel inhibitor activity,macromolecular complex binding,SNAP receptor activity,SNARE binding,syntaxin binding	1.37063e-13	688.091	857.724	749.476	588.017	588.88	694.437	523.339	597.368	717.711	687.211	672.483	639.622	1.0857	0.402625	0.118624	0.395099
O70443	Gnaz	Mus musculus	Guanine nucleotide-binding protein G(z) subunit alpha	cell body,cytosol,dendrite,heterotrimeric G-protein complex,membrane,plasma membrane	adenylate cyclase-inhibiting G-protein coupled receptor signaling pathway,adenylate cyclase-modulating G-protein coupled receptor signaling pathway,G-protein coupled receptor signaling pathway	G-protein beta/gamma-subunit complex binding,G-protein coupled receptor binding,G-protein coupled serotonin receptor binding,GTPase activity,GTP binding,metal ion binding	1.00151e-22	1046.18	1062.36	978.533	668.154	796.078	910.261	709.169	757.272	1092.88	1082.67	1025.3	933.457	0.97515	0.842482	-0.0363041	0.0744395
O70456	Sfn	Mus musculus	14-3-3 protein sigma	cytoplasm,cytosol,extracellular region,nucleus	establishment of skin barrier,intrinsic apoptotic signaling pathway in response to DNA damage,keratinization,keratinocyte development,keratinocyte differentiation,negative regulation of cysteine-type endopeptidase activity involved in apoptotic process,negative regulation of keratinocyte proliferation,positive regulation of cell growth,positive regulation of epidermal cell differentiation,positiv…	identical protein binding,phosphoprotein binding,protein kinase binding	0.000832248	93473.5	87288.6	97905.6	96018.2	89773.1	92891.8	83140.5	94347.3	91566.6	92045.8	88989.3	90017.9	1.03193	0.324635	0.0453394	0.488604
O70475	Ugdh	Mus musculus	UDP-glucose 6-dehydrogenase	cytosol,nucleoplasm,nucleus	carbohydrate metabolic process,chondroitin sulfate biosynthetic process,gastrulation with mouth forming second,glycosaminoglycan biosynthetic process,heparan sulfate proteoglycan biosynthetic process,protein hexamerization,UDP-glucuronate biosynthetic process	identical protein binding,NAD binding,UDP-glucose 6-dehydrogenase activity	0.00252996	521.902	169.743	147.494	620.437	NaN	364.894	NaN	561.739	754.511	NaN	NaN	658.125	0.554445	0.198883	-0.850885	0.701402
O70480	Vamp4	Mus musculus	Vesicle-associated membrane protein 4	cell surface,Golgi apparatus,integral component of presynaptic endosome membrane,integral component of synaptic vesicle membrane,phagocytic vesicle,SNARE complex,synaptic vesicle,trans-Golgi network	cellular response to interferon-gamma,Golgi ribbon formation,Golgi to plasma membrane protein transport,microtubule cytoskeleton organization,regulation of Golgi to plasma membrane protein transport,regulation of synaptic vesicle endocytosis,SNARE complex assembly,synaptic vesicle to endosome fusion,toxin transport		0.000241229	87.6575	45.378	226.519	NaN	26.2671	96.4554	NaN	168.845	62.0232	94.9976	NaN	108.622	0.887991	0.846459	-0.171382	0.0723942
O70481	Ubr1	Mus musculus	E3 ubiquitin-protein ligase UBR1	cytoplasm,cytosol,proteasome complex,ubiquitin ligase complex	cellular response to leucine,negative regulation of TOR signaling,protein ubiquitination,ubiquitin-dependent protein catabolic process,ubiquitin-dependent protein catabolic process via the N-end rule pathway	leucine binding,ubiquitin protein ligase activity,ubiquitin-protein transferase activity,zinc ion binding	6.50412e-05	75.9966	105.994	77.1557	39.8379	66.4198	73.0809	NaN	69.6198	65.4504	64.8885	44.8391	61.1994	1.19414	0.391067	0.255975	0.407748
O70492	Snx3	Mus musculus	Sorting nexin-3	clathrin-coated vesicle,cytoplasm,cytosol,early endosome,early endosome membrane,early phagosome,endosome membrane,retromer complex	endocytic recycling,heme biosynthetic process,hemoglobin biosynthetic process,intralumenal vesicle formation,late endosome to Golgi transport,membrane invagination,negative regulation of early endosome to late endosome transport,negative regulation of phagocytosis,negative regulation of protein catabolic process,negative regulation of protein transport,negative regulation of viral entry into host…	phosphatidylinositol-3,5-bisphosphate binding,phosphatidylinositol-3-phosphate binding,phosphatidylinositol-4-phosphate binding,phosphatidylinositol-5-phosphate binding,protein phosphatase binding	3.30987e-12	1493.81	1402.82	1560.9	1570.22	1550.87	1515.72	1564.97	1637.35	1482.3	1520.79	1557.9	1552.66	0.976208	0.38827	-0.03474	0.410867
O70493	Snx12	Mus musculus	Sorting nexin-12	early endosome,early endosome membrane,retromer complex	endocytic recycling,late endosome to Golgi transport,negative regulation of early endosome to late endosome transport,negative regulation of gene expression,negative regulation of protein catabolic process,negative regulation of protein processing,negative regulation of protein transport,protein transport,regulation of endocytosis,regulation of intracellular protein transport	enzyme binding,phosphatidylinositol-3-phosphate binding,phosphatidylinositol binding	2.67607e-13	1955.41	1532.71	1669.85	1654.43	1679.93	1698.47	1572.25	1813.46	1814.28	1858.24	1804.1	1772.47	0.95825	0.415401	-0.0615264	0.381533
O70503	Hsd17b12	Mus musculus	Very-long-chain 3-oxoacyl-CoA reductase	endoplasmic reticulum membrane,extracellular matrix,integral component of membrane	estrogen biosynthetic process,extracellular matrix organization,fatty acid biosynthetic process,positive regulation of cell-substrate adhesion	3-oxo-arachidoyl-CoA reductase activity,3-oxo-behenoyl-CoA reductase activity,3-oxo-cerotoyl-CoA reductase activity,3-oxo-lignoceroyl-CoA reductase activity,collagen binding,estradiol 17-beta-dehydrogenase activity,fibronectin binding,heparin binding	1.71841e-11	286.731	296.864	268.769	145.211	178.019	235.119	130.527	166.974	225.504	322.925	264.311	222.048	1.05886	0.783555	0.0825175	0.105931
O70551	Srpk1	Mus musculus	SRSF protein kinase 1	chromatin,cytoplasm,cytosol,endoplasmic reticulum,nuclear matrix,nuclear speck,nucleoplasm,nucleus,plasma membrane	cell differentiation,chromosome segregation,intracellular signal transduction,negative regulation of viral genome replication,positive regulation of viral genome replication,protein phosphorylation,regulation of gene expression,regulation of mRNA processing,spliceosomal complex assembly	ATP binding,magnesium ion binding,MAP kinase activity,protein serine/threonine kinase activity	1.05495e-15	103.784	95.9719	108.267	111.903	117.32	107.449	92.5608	102.086	136.405	99.3871	106.681	107.424	1.00023	0.997682	0.000338864	0.00100795
O70566	Diaph2	Mus musculus	Protein diaphanous homolog 2		actin filament polymerization,multicellular organism development,oogenesis	actin binding,Rho GTPase binding	2.04084e-10	2010.8	2088.57	2198.12	2133.63	2247.38	2135.7	1783.86	2090.37	2358.42	2388.43	2083.77	2140.97	0.997538	0.965321	-0.00355575	0.0153285
O70572	Smpd2	Mus musculus	Sphingomyelin phosphodiesterase 2	caveola,cell periphery,endoplasmic reticulum,integral component of membrane,membrane	ceramide biosynthetic process,intracellular signal transduction,positive regulation of apoptotic process,response to mechanical stimulus,sphingolipid catabolic process,sphingomyelin catabolic process,sphingomyelin metabolic process	metal ion binding,sphingomyelin phosphodiesterase activity	0.0036449	151.432	151.215	119.534	108.621	99.6375	126.088	101.535	132.405	121.289	93.2878	121.782	114.059	1.10546	0.380425	0.144642	0.419731
O70585	Dtnb	Mus musculus	Dystrobrevin beta	cytoplasm,plasma membrane,synapse	synaptic signaling	zinc ion binding	7.26984e-10	43.723	63.6779	49.9674	49.7046	37.8569	48.986	34.2428	45.4158	61.6981	29.9902	37.2204	41.7135	1.17434	0.332763	0.231856	0.477865
O70589	Cask	Mus musculus	Peripheral plasma membrane protein CASK	apical dendrite,basement membrane,basolateral plasma membrane,cell-cell junction,ciliary membrane,cytoplasm,cytosol,dendrite,membrane,membrane raft,neuronal cell body,nuclear lamina,nuclear matrix,nucleolus,nucleus,plasma membrane,podocyte foot,postsynaptic density,presynaptic membrane,macromolecular complex,Schaffer collateral - CA1 synapse,synapse,synaptic membrane,vesicle	calcium ion import,negative regulation of cell-matrix adhesion,negative regulation of cellular response to growth factor stimulus,negative regulation of keratinocyte proliferation,negative regulation of wound healing,positive regulation of calcium ion import,positive regulation of dendritic spine morphogenesis,positive regulation of insulin secretion,positive regulation of transcription from RNA …	ATP binding,calmodulin binding,neurexin family protein binding,PDZ domain binding,macromolecular complex binding,protein C-terminus binding,protein serine/threonine kinase activity	4.60055e-15	1014.27	1130.02	1122.25	1034.28	1052.22	1070.61	977.074	1019.62	1120.46	1229.45	1126.05	1094.53	0.978143	0.64612	-0.0318823	0.189687
O70591	Pfdn2	Mus musculus	Prefoldin subunit 2	cytoplasm,cytosol,mitochondrion,nucleus,prefoldin complex	positive regulation of cytoskeleton organization,protein folding	protein binding involved in protein folding,unfolded protein binding	3.85465e-12	2607.8	2124.24	2377.76	2450.32	2369.09	2385.84	2418.6	2305.45	2082.51	2070.25	1936.69	2162.7	1.10318	0.0931052	0.141665	1.03103
O88271	Cfdp1	Mus musculus	Craniofacial development protein 1	basement membrane,condensed chromosome kinetochore	cell adhesion,multicellular organism development,negative regulation of fibroblast apoptotic process,regulation of cell proliferation,regulation of cell shape		1.47555e-13	324.732	246.108	282.792	271.129	391.364	303.225	357.938	290.913	282.727	241.065	264.341	287.397	1.05508	0.635362	0.0773464	0.196979
O88286	Wiz	Mus musculus	Protein Wiz	midbody,nucleoplasm,nucleus	positive regulation of nuclear cell cycle DNA replication,protein stabilization,regulation of transcription, DNA-templated	transcription factor activity, sequence-specific DNA binding,histone methyltransferase binding,metal ion binding,macromolecular complex binding,RNA polymerase II transcription corepressor binding,SET domain binding	0.00257509	NaN	11.6406	NaN	6.9948	NaN	9.31769	11.8065	NaN	NaN	18.2588	NaN	15.0327	0.61983	0.287122	-0.690056	0.541934
O88291	Znf326	Mus musculus	DBIRD complex subunit ZNF326	DBIRD complex,intracellular membrane-bounded organelle,nuclear matrix,nucleoplasm,nucleus	mRNA processing,positive regulation of transcription, DNA-templated,regulation of DNA-templated transcription, elongation,regulation of RNA splicing,RNA splicing	DNA binding,RNA polymerase II core binding,zinc ion binding	1.56723e-15	216.27	191.026	204.351	198.58	205.971	203.239	189.614	190.364	190.77	241.379	235.477	209.521	0.970021	0.630355	-0.0439122	0.200415
O88307	Sorl1	Mus musculus	Sortilin-related receptor	cell surface,early endosome,early endosome membrane,endoplasmic reticulum,endoplasmic reticulum membrane,endosome,extracellular space,Golgi apparatus,Golgi cisterna,Golgi membrane,integral component of membrane,membrane,multivesicular body,multivesicular body membrane,neuronal cell body,nuclear envelope lumen,perinuclear region of cytoplasm,perinucleolar compartment,plasma membrane,recycling endo…	adaptive thermogenesis,cell migration,diet induced thermogenesis,insulin receptor recycling,negative regulation of beta-amyloid formation,negative regulation of aspartic-type endopeptidase activity involved in amyloid precursor protein catabolic process,negative regulation of BMP signaling pathway,negative regulation of MAP kinase activity,negative regulation of metalloendopeptidase activity invo…	ADP-ribosylation factor binding,beta-amyloid binding,low-density lipoprotein particle binding,neuropeptide binding,transmembrane signaling receptor activity	2.55647e-13	126.8	130.576	144.607	122.186	103.102	125.455	125.111	124.624	128.117	139.065	141.455	131.674	0.952763	0.4379	-0.0698114	0.358625
O88322	Nid2	Mus musculus	Nidogen-2	basement membrane,cell surface,collagen-containing extracellular matrix,extracellular matrix,extracellular region,plasma membrane	cell-matrix adhesion	calcium ion binding	9.59922e-17	7760.02	6506.47	8582.09	8711.21	6937	7699.36	9328.04	10942.7	10047.4	17715.3	13564.5	12319.6	0.624968	0.0196468	-0.678145	1.70671
O88342	Wdr1	Mus musculus	WD repeat-containing protein 1	actin cytoskeleton,actomyosin, actin portion,cell-cell junction,cell junction,cell projection,cortical actin cytoskeleton,myelin sheath,plasma membrane,podosome	actin cytoskeleton organization,actin filament depolymerization,actin filament fragmentation,apical junction assembly,cortical cytoskeleton organization,establishment of planar polarity of follicular epithelium,locomotion,maintenance of epithelial cell apical/basal polarity,neutrophil mediated immunity,neutrophil migration,platelet formation,positive regulation of actin filament depolymerization,…	actin binding,actin filament binding	3.17775e-17	8930.7	9007.21	9411.58	10062.5	9776.08	9437.61	9763.27	9343.17	8773.34	9152.8	9147.61	9236.04	1.02182	0.477881	0.0311479	0.32068
O88343	Slc4a4	Mus musculus	Electrogenic sodium bicarbonate cotransporter 1	basolateral plasma membrane,cell surface,integral component of plasma membrane,membrane,plasma membrane	bicarbonate transport,positive regulation of glycolytic process,regulation of intracellular pH,regulation of membrane potential,regulation of pH,sodium ion export from cell,sodium ion transmembrane transport,sodium ion transport,transmembrane transport	identical protein binding,inorganic anion exchanger activity,sodium:bicarbonate symporter activity,symporter activity	2.22651e-18	2416.22	3443.49	2290.82	1568.14	1857.98	2315.33	1420.09	1544.87	2570.32	2700.69	2556.99	2158.59	1.07261	0.721214	0.101126	0.141936
O88351	Ikbkb	Mus musculus	Inhibitor of nuclear factor kappa-B kinase subunit beta	CD40 receptor complex,cytoplasm,cytoplasmic side of plasma membrane,cytosol,IkappaB kinase complex,intracellular membrane-bounded organelle,membrane raft,nucleus	B cell homeostasis,cellular response to tumor necrosis factor,cortical actin cytoskeleton organization,I-kappaB kinase/NF-kappaB signaling,I-kappaB phosphorylation,interleukin-1-mediated signaling pathway,negative regulation of bicellular tight junction assembly,negative regulation of myosin-light-chain-phosphatase activity,neuron projection development,peptidyl-serine phosphorylation,positive re…	ATP binding,identical protein binding,IkappaB kinase activity,macromolecular complex binding,protein heterodimerization activity,protein homodimerization activity,protein kinase activity,protein kinase binding,protein phosphatase binding,protein serine/threonine kinase activity,scaffold protein binding,transferrin receptor binding	3.4025e-05	66.1267	104.201	101.033	105.538	114.55	98.2898	122.637	89.0126	71.5356	104.045	118.806	101.207	0.971174	0.823384	-0.0421978	0.0843974
O88384	Vti1b	Mus musculus	Vesicle transport through interaction with t-SNAREs homolog 1B	anchored component of membrane,cytosol,early endosome membrane,endoplasmic reticulum membrane,ER to Golgi transport vesicle membrane,Golgi apparatus,integral component of membrane,intracellular membrane-bounded organelle,late endosome membrane,lysosomal membrane,neuronal cell body,perinuclear region of cytoplasm,recycling endosome,recycling endosome membrane,SNARE complex,synaptic vesicle,vesicle	ER to Golgi vesicle-mediated transport,Golgi to vacuole transport,intra-Golgi vesicle-mediated transport,protein targeting to vacuole,regulation of protein localization to plasma membrane,retrograde transport, endosome to Golgi,vesicle fusion with Golgi apparatus	chloride channel inhibitor activity,SNAP receptor activity,SNARE binding	2.34544e-12	409.77	393	343.865	214.385	273.992	327.003	223.059	313.078	322.098	355.319	263.11	295.333	1.10723	0.487515	0.14696	0.312012
O88441	Mtx2	Mus musculus	Metaxin-2	mitochondrion,nucleolus,mitochondrial sorting and assembly machinery complex	protein transport		1.46172e-11	2167.1	1913.41	2274.16	2407.24	2064.37	2165.26	2033.2	2231.01	2033.43	1964.58	1727.66	1997.98	1.08372	0.191548	0.115998	0.717723
O88444	Adcy1	Mus musculus	Adenylate cyclase type 1	cytoplasm,glutamatergic synapse,hippocampal mossy fiber to CA3 synapse,integral component of plasma membrane,integral component of postsynaptic density membrane,membrane raft,nucleus,plasma membrane,postsynaptic density	activation of adenylate cyclase activity,adenylate cyclase-activating G-protein coupled receptor signaling pathway,axonogenesis,brain development,cAMP biosynthetic process,cAMP-mediated signaling,cellular response to calcium ion,cellular response to forskolin,circadian rhythm,long-term memory,neuroinflammatory response,positive regulation of CREB transcription factor activity,positive regulation …	adenylate cyclase activity,ATP binding,calcium- and calmodulin-responsive adenylate cyclase activity,calmodulin binding,metal ion binding	2.42092e-07	263.62	292.524	176.833	107.763	149.47	198.042	100.245	140.311	215.655	247.751	246.757	190.144	1.04154	0.867321	0.0587175	0.0618203
O88447	Klc1	Mus musculus	Kinesin light chain 1	axon,ciliary rootlet,cytoplasm,cytoplasmic vesicle,cytosol,growth cone,kinesin complex,membrane,membrane-bounded organelle,microtubule,neuronal cell body,neuron projection,vesicle	axo-dendritic transport,intracellular protein transport,microtubule-based movement,protein localization to synapse,stress granule disassembly	microtubule motor activity,tubulin binding	1.17835e-17	916.55	857.91	890.857	997.22	912.203	914.948	910.344	879.889	828.541	861.476	862.819	868.614	1.05334	0.119927	0.0749748	0.921082
O88448	Klc2	Mus musculus	Kinesin light chain 2	ciliary rootlet,cytoplasm,cytosol,kinesin complex,microtubule,mitochondrion,neuron projection,nucleoplasm,plasma membrane,macromolecular complex	axo-dendritic transport,microtubule-based movement	kinesin binding,microtubule motor activity	2.67239e-14	852.777	842.594	948.391	929.964	920.772	898.899	880.409	864.511	876.404	826.04	801.661	849.805	1.05777	0.099928	0.0810278	1.00031
O88455	Dhcr7	Mus musculus	7-dehydrocholesterol reductase	cytosol,endoplasmic reticulum,integral component of endoplasmic reticulum membrane,intracellular membrane-bounded organelle,nuclear outer membrane	blood vessel development,brassinosteroid biosynthetic process,cell differentiation,cholesterol biosynthetic process,lung development,multicellular organism growth,post-embryonic development,regulation of cell proliferation,regulation of cholesterol biosynthetic process,sterol biosynthetic process	7-dehydrocholesterol reductase activity,NADP binding,oxidoreductase activity, acting on the CH-CH group of donors,sterol delta7 reductase activity	8.06814e-06	124.175	195.82	133.879	61.9515	78.2017	118.805	49.0519	85.979	120.618	128.187	113.143	99.3957	1.19528	0.502068	0.257344	0.299238
O88456	Capns1	Mus musculus	Calpain small subunit 1	cytosol,membrane,plasma membrane		calcium-dependent cysteine-type endopeptidase activity,calcium ion binding,macromolecular complex binding	1.15351e-13	2099.63	1542.93	1886.38	1836.23	1743.84	1821.8	1569.51	1816.06	1551.73	1459.11	1451.37	1569.55	1.16071	0.0550606	0.21501	1.25916
O88485	Dync1i1	Mus musculus	Cytoplasmic dynein 1 intermediate chain 1	axon cytoplasm,condensed chromosome kinetochore,cytoplasm,cytoplasmic dynein complex,cytoplasmic ribonucleoprotein granule,kinetochore,microtubule,nucleus,perinuclear region of cytoplasm,recycling endosome,spindle pole,vesicle	microtubule-based movement,transport along microtubule,vesicle transport along microtubule	dynein heavy chain binding,dynein light chain binding,microtubule binding,microtubule motor activity,spectrin binding	1.66428e-18	1548.38	1631.64	1606	1757.04	1641.66	1636.94	1667.79	1557.14	1470.88	1564.47	1595.06	1571.07	1.04193	0.195405	0.0592588	0.709064
O88487	Dync1i2	Mus musculus	Cytoplasmic dynein 1 intermediate chain 2	cytoplasm,cytoplasmic dynein complex,microtubule,vesicle	microtubule-based movement,negative regulation of neuron projection development,transport along microtubule	dynein heavy chain binding,dynein light chain binding,motor activity,macromolecular complex binding	4.94106e-14	1069.54	1161.71	1057.55	1176.9	1114.41	1116.02	1099.27	1031.33	1028.69	1035.58	1071.45	1053.26	1.05959	0.0524735	0.0835026	1.28006
O88492	Plin4	Mus musculus	Perilipin-4	cytosol,intracellular membrane-bounded organelle,lipid particle,plasma membrane			3.41603e-13	3753.96	2500.75	3391.19	2894.05	1924.27	2892.84	2403.2	4199.19	3840.77	2660.62	2294.87	3079.73	0.939316	0.722553	-0.0903168	0.14113
O88502	Pde8a	Mus musculus	High affinity cAMP-specific and IBMX-insensitive 3',5'-cyclic phosphodiesterase 8A		cAMP catabolic process,cellular response to epidermal growth factor stimulus,negative regulation of cell death,negative regulation of hydrogen peroxide-induced cell death,positive regulation of ERK1 and ERK2 cascade,positive regulation of protein phosphorylation,signal transduction	3',5'-cyclic-AMP phosphodiesterase activity,3',5'-cyclic-GMP phosphodiesterase activity,kinase binding,metal ion binding	2.82571e-07	176.695	153.226	158.099	141.54	144.725	154.857	130.769	129.937	160.619	201.934	141.968	153.045	1.01184	0.90549	0.0169761	0.0431163
O88507	Cntfr	Mus musculus	Ciliary neurotrophic factor receptor subunit alpha	anchored component of membrane,apical plasma membrane,ciliary neurotrophic factor receptor complex,CNTFR-CLCF1 complex,external side of plasma membrane,receptor complex	brainstem development,ciliary neurotrophic factor-mediated signaling pathway,cytokine-mediated signaling pathway,negative regulation of neuron apoptotic process,positive regulation of cell proliferation,sex differentiation,skeletal muscle organ development,suckling behavior	ciliary neurotrophic factor receptor activity,cytokine binding,cytokine receptor activity,receptor binding	1.69913e-09	1322.92	831.207	1111.62	579.716	697.983	908.69	415.488	858.35	1155.27	1799.74	1608.65	1167.5	0.778322	0.390704	-0.361562	0.408153
O88520	Shoc2	Mus musculus	Leucine-rich repeat protein SHOC-2	cytoplasm,cytosol,nucleoplasm,nucleus,protein phosphatase type 1 complex	positive regulation of Ras protein signal transduction,signal transduction	protein phosphatase 1 binding,protein phosphatase binding	7.05713e-06	98.4477	105.174	140.878	102.848	84.8147	106.432	130.318	105.436	103.699	121.558	93.7957	110.961	0.959185	0.701427	-0.0601197	0.154018
O88522	Ikbkg	Mus musculus	NF-kappa-B essential modulator	cytoplasm,cytosol,IkappaB kinase complex,mitotic spindle,nucleus,macromolecular complex,spindle pole,ubiquitin ligase complex	activation of NF-kappaB-inducing kinase activity,anoikis,B cell homeostasis,cellular response to DNA damage stimulus,establishment of vesicle localization,negative regulation of endoplasmic reticulum stress-induced intrinsic apoptotic signaling pathway,positive regulation of gene expression,positive regulation of I-kappaB kinase/NF-kappaB signaling,positive regulation of macroautophagy,positive r…	identical protein binding,K63-linked polyubiquitin binding,linear polyubiquitin binding,metal ion binding,peroxisome proliferator activated receptor binding,macromolecular complex binding,protein domain specific binding,protein heterodimerization activity,protein homodimerization activity,transferrin receptor binding,ubiquitin protein ligase binding	1.9837e-10	142.065	145.418	148.551	133.418	127.889	139.468	146.823	149.07	124.562	147.238	124.16	138.371	1.00793	0.877587	0.0113974	0.0567097
O88531	Ppt1	Mus musculus	Palmitoyl-protein thioesterase 1	axon,cytosol,dendrite,extracellular region,extracellular space,Golgi apparatus,intracellular membrane-bounded organelle,lysosome,membrane raft,neuronal cell body,neuron projection,nucleus,synapse,synaptic vesicle	adult locomotory behavior,associative learning,brain development,cellular macromolecule catabolic process,cellular protein catabolic process,grooming behavior,lipid catabolic process,lysosomal lumen acidification,lysosome organization,membrane raft organization,negative regulation of apoptotic process,negative regulation of cell growth,negative regulation of neuron apoptotic process,nervous syste…	lysophosphatidic acid binding,palmitoyl-(protein) hydrolase activity,palmitoyl-CoA hydrolase activity,sulfatide binding,thiolester hydrolase activity	4.27397e-11	1677.83	1471.72	1595.92	1594.89	1700.36	1608.15	1674.54	1686.32	1699.4	1762.39	1545.39	1673.61	0.960885	0.256684	-0.057564	0.590601
O88532	Zfr	Mus musculus	Zinc finger RNA-binding protein	chromosome,cytoplasm,nucleus	multicellular organism development	DNA binding,double-stranded RNA binding,single-stranded RNA binding,zinc ion binding	3.27597e-12	565.417	639.959	658.02	595.116	621.749	616.052	561.511	577.154	619.57	664.943	650.375	614.711	1.00218	0.959978	0.00314498	0.0177386
O88533	Ddc	Mus musculus	Aromatic-L-amino-acid decarboxylase	axon,cytoplasm,neuronal cell body,synaptic vesicle	aminergic neurotransmitter loading into synaptic vesicle,catecholamine metabolic process,cellular amino acid metabolic process,cellular response to alkaloid,cellular response to drug,cellular response to growth factor stimulus,circadian rhythm,dopamine biosynthetic process,isoquinoline alkaloid metabolic process,multicellular organism aging,phytoalexin metabolic process,response to pyrethroid,res…	amino acid binding,aromatic-L-amino-acid decarboxylase activity,carboxy-lyase activity,enzyme binding,L-dopa decarboxylase activity,protein domain specific binding,pyridoxal phosphate binding	3.92551e-12	1319.56	1563.74	1421.16	1222.84	1366.24	1378.71	1267.92	1373.72	1395.43	1610.68	1519.29	1433.41	0.96184	0.524549	-0.0561318	0.280214
O88543	Cops3	Mus musculus	COP9 signalosome complex subunit 3	COP9 signalosome,cytosol,nucleoplasm	in utero embryonic development,protein deneddylation,ubiquitin-dependent protein catabolic process		9.93461e-19	990.894	836.511	932.926	800.572	762.432	864.667	765.772	887.448	780.925	912.262	802.511	829.784	1.04204	0.518277	0.059409	0.285438
O88544	Cops4	Mus musculus	COP9 signalosome complex subunit 4	cell junction,COP9 signalosome,cytosol,nuclear speck,synaptic vesicle	protein deneddylation		2.78143e-17	1456.47	1254.08	1486.74	1486.45	1337.07	1404.16	1390.79	1463.87	1253.19	1270.31	1222.81	1320.19	1.0636	0.23485	0.0889576	0.629209
O88545	Cops6	Mus musculus	COP9 signalosome complex subunit 6	COP9 signalosome,cytoplasm,nucleoplasm	protein deneddylation	isopeptidase activity,metallopeptidase activity	8.29288e-15	3674.36	3224.05	3623.19	3917.53	3424.59	3572.75	3630.74	3491.26	3131.19	3230.19	2886.82	3274.04	1.09123	0.128747	0.125961	0.890262
O88569	Hnrnpa2b1	Mus musculus	Heterogeneous nuclear ribonucleoproteins A2/B1	Cajal body,catalytic step 2 spliceosome,chromatin,chromosome, telomeric region,cytoplasm,extracellular exosome,glutamatergic synapse,neuronal cell body,neuronal ribonucleoprotein granule,neuron projection,nuclear matrix,nucleoplasm,nucleus,perikaryon,postsynaptic cytosol,ribonucleoprotein complex,spliceosomal complex	G-quadruplex DNA unwinding,miRNA transport,mRNA export from nucleus,mRNA processing,mRNA splicing, via spliceosome,negative regulation of mRNA splicing, via spliceosome,negative regulation of transcription from RNA polymerase II promoter,positive regulation of telomerase RNA reverse transcriptase activity,positive regulation of telomere maintenance via telomere lengthening,primary miRNA processin…	DNA polymerase binding,G-rich strand telomeric DNA binding,identical protein binding,miRNA binding,mRNA 3'-UTR binding,mRNA CDS binding,N6-methyladenosine-containing RNA binding,pre-mRNA intronic binding,regulatory region RNA binding,RNA binding,single-stranded telomeric DNA binding	3.61845e-15	11775.1	11166.6	12189.6	12773	12588.2	12098.5	12448.2	12798.1	12329.7	11954	11759.2	12257.8	0.987	0.654446	-0.0188774	0.184126
O88587	Comt	Mus musculus	Catechol O-methyltransferase	axon,cell body,cytosol,dendrite,dendritic spine,integral component of membrane,intracellular membrane-bounded organelle,membrane,mitochondrion,postsynaptic membrane	catecholamine catabolic process,catechol-containing compound metabolic process,cellular response to phosphate starvation,developmental process,dopamine catabolic process,dopamine metabolic process,estrogen metabolic process,female pregnancy,learning,methylation,multicellular organismal reproductive process,negative regulation of dopamine metabolic process,negative regulation of renal sodium excre…	catechol O-methyltransferase activity,L-dopa O-methyltransferase activity,magnesium ion binding,O-methyltransferase activity,orcinol O-methyltransferase activity	7.73363e-10	617.202	680.809	578.919	519.311	553.978	590.044	456.41	700.807	638.194	581.267	479.044	571.144	1.03309	0.735685	0.0469669	0.133308
O88597	Becn1	Mus musculus	Beclin-1	autophagosome,cytoplasm,cytoplasmic vesicle,cytoskeleton,cytosol,dendrite,endoplasmic reticulum,endoplasmic reticulum membrane,endosome,endosome membrane,extrinsic component of membrane,membrane,mitochondrial membrane,nucleus,phagocytic vesicle,pre-autophagosomal structure,phosphatidylinositol 3-kinase complex, class III,phosphatidylinositol 3-kinase complex, class III, type I,phosphatidylinosito…	aging,beta-amyloid metabolic process,angiogenesis,apoptotic process,autophagosome assembly,autophagy,mitophagy,cell division,cellular response to aluminum ion,cellular response to amino acid starvation,cellular response to copper ion,cellular response to epidermal growth factor stimulus,cellular response to glucose starvation,cellular response to hydrogen peroxide,cellular response to nitrogen st…	GTPase binding,identical protein binding,phosphatidylinositol 3-kinase binding,protein kinase binding,ubiquitin protein ligase binding	1.54731e-18	864.378	832.168	950.788	956.97	1036.82	928.225	929.159	848.464	936.393	860.657	826.728	880.28	1.05447	0.292646	0.0765118	0.533658
O88602	Cacng2	Mus musculus	Voltage-dependent calcium channel gamma-2 subunit	AMPA glutamate receptor complex,cell surface,cerebellar mossy fiber,cytosol,glutamatergic synapse,integral component of postsynaptic density membrane,plasma membrane,postsynaptic density,postsynaptic density membrane,Schaffer collateral - CA1 synapse,somatodendritic compartment,voltage-gated calcium channel complex	eye blink reflex,membrane depolarization,membrane hyperpolarization,neurological system process,neuromuscular junction development,neurotransmitter receptor internalization,neurotransmitter receptor localization to postsynaptic specialization membrane,neurotransmitter receptor transport, postsynaptic endosome to lysosome,positive regulation of alpha-amino-3-hydroxy-5-methyl-4-isoxazole propionate…	channel regulator activity,ionotropic glutamate receptor binding,voltage-gated calcium channel activity	1.61255e-12	268.968	343.644	294.98	174.988	220.414	260.599	173.923	226.535	281.756	308.3	317.002	261.503	0.996541	0.982419	-0.00499931	0.00770318
O88630	Gosr1	Mus musculus	Golgi SNAP receptor complex member 1	cis-Golgi network,cytosol,Golgi apparatus,Golgi medial cisterna,Golgi membrane,integral component of membrane,SNARE complex	ER to Golgi vesicle-mediated transport,protein transport,regulation of vesicle targeting, to, from or within Golgi,retrograde transport, endosome to Golgi,vesicle fusion	SNAP receptor activity	6.04796e-06	43.8225	137.449	94.3608	68.0854	77.6505	84.2737	NaN	92.9031	93.3323	87.8165	90.0349	91.0217	0.925864	0.714839	-0.111128	0.145792
O88643	Pak1	Mus musculus	Serine/threonine-protein kinase PAK 1	actin filament,axon,cell-cell junction,chromosome,cytoplasm,cytosol,dendrite,focal adhesion,glutamatergic synapse,growth cone,intercalated disc,invadopodium,lamellipodium,membrane,nuclear membrane,nucleoplasm,nucleus,plasma membrane,postsynaptic density,presynapse,macromolecular complex,ruffle,ruffle membrane,Z disc	actin cytoskeleton reorganization,activation of protein kinase activity,amygdala development,apoptotic process,branching morphogenesis of an epithelial tube,cell migration,cellular response to DNA damage stimulus,cellular response to insulin stimulus,cellular response to organic cyclic compound,chromatin remodeling,dendrite development,dendritic spine development,establishment of cell polarity,ex…	ATP binding,collagen binding,identical protein binding,protein kinase activity,protein kinase binding,protein serine/threonine kinase activity	9.12178e-13	2887.69	2956.87	3050.61	2855.37	2849.12	2919.93	2843.79	2880.47	2783.32	2830.35	2920.31	2851.65	1.02395	0.162453	0.0341397	0.789272
O88653	Lamtor3	Mus musculus	Ragulator complex protein LAMTOR3	late endosome,Ragulator complex	activation of MAPKK activity,cellular protein localization,cellular response to amino acid stimulus,positive regulation of TOR signaling,protein localization to cell junction	guanyl-nucleotide exchange factor activity,kinase activator activity,binding, bridging	7.06354e-10	441.289	393.459	445.919	340.971	458.14	415.955	436.204	557.547	334.27	466.899	478.306	454.645	0.914901	0.385787	-0.128312	0.413652
O88668	Creg1	Mus musculus	Protein CREG1	extracellular space,transcription factor complex	regulation of growth,regulation of transcription, DNA-templated	transcription factor binding	2.07532e-15	217.771	163.584	218.49	152.538	188.79	188.235	186.818	197.616	214.798	233.948	141.675	194.971	0.96545	0.752183	-0.0507267	0.123676
O88685	Psmc3	Mus musculus	26S proteasome regulatory subunit 6A	cytoplasm,nucleus,cytoplasmic mRNA processing body,perinuclear region of cytoplasm,proteasome accessory complex,proteasome complex,proteasome regulatory particle, base subcomplex	blastocyst development,modulation by host of viral transcription,positive regulation of RNA polymerase II transcriptional preinitiation complex assembly,positive regulation of transcription from RNA polymerase II promoter,protein catabolic process	ATP binding,hydrolase activity,identical protein binding	3.35022e-13	1667.12	1553.38	1736.92	1687.01	1634.75	1655.84	1695	1643.57	1728.46	1617.36	1776.36	1692.15	0.97854	0.410554	-0.0312979	0.38663
O88696	Clpp	Mus musculus	ATP-dependent Clp protease proteolytic subunit, mitochondrial	endopeptidase Clp complex,mitochondrial matrix,mitochondrion	membrane protein proteolysis,misfolded or incompletely synthesized protein catabolic process,proteolysis involved in cellular protein catabolic process	ATPase binding,ATP-dependent peptidase activity,endopeptidase activity,identical protein binding,serine-type endopeptidase activity	2.15835e-13	1492.1	1276.5	1537.89	1638.81	1413.38	1471.74	1506.13	1738.88	1246.77	1348.81	1193.14	1406.75	1.0462	0.590558	0.0651568	0.228737
O88703	Hcn2	Mus musculus	Potassium/sodium hyperpolarization-activated cyclic nucleotide-gated channel 2	axon,cytoplasm,dendrite membrane,dendritic shaft,HCN channel complex,integral component of plasma membrane,membrane,neuronal cell body,plasma membrane,somatodendritic compartment,synapse	cellular response to cAMP,cellular response to cGMP,potassium ion import across plasma membrane,potassium ion transmembrane transport,regulation of ion transmembrane transport,regulation of membrane potential,sodium ion import across plasma membrane,sodium ion transmembrane transport	cAMP binding,identical protein binding,intracellular cAMP activated cation channel activity,binding, bridging,PDZ domain binding,macromolecular complex binding,voltage-gated potassium channel activity,voltage-gated sodium channel activity	6.40971e-12	390.338	445.993	331.132	238.367	345.236	350.213	240.2	268.786	351.844	294.771	305.32	292.184	1.1986	0.176665	0.261355	0.752849
O88704	Hcn1	Mus musculus	Potassium/sodium hyperpolarization-activated cyclic nucleotide-gated channel 1	apical dendrite,axon,axon terminus,basolateral plasma membrane,cell surface,cytoplasm,dendrite,dendrite membrane,dendritic shaft,HCN channel complex,integral component of plasma membrane,neuronal cell body,plasma membrane,somatodendritic compartment,synapse	apical protein localization,cellular response to cAMP,negative regulation of action potential,positive regulation of cation channel activity,potassium ion transmembrane transport,protein homotetramerization,regulation of membrane depolarization,regulation of membrane hyperpolarization,regulation of membrane potential,response to calcium ion,retinal cone cell development,sodium ion transmembrane t…	cAMP binding,identical protein binding,intracellular cAMP activated cation channel activity,phosphatidylinositol-3,4,5-trisphosphate binding,phosphatidylinositol-4,5-bisphosphate binding,macromolecular complex binding,protein C-terminus binding,voltage-gated cation channel activity,voltage-gated potassium channel activity,voltage-gated sodium channel activity	5.59419e-12	142.913	171.421	133.66	102.439	123.952	134.877	82.9397	145.851	138.645	147.642	133.09	129.634	1.04045	0.75855	0.0572043	0.120016
O88712	Ctbp1	Mus musculus	C-terminal-binding protein 1	cytoplasm,glutamatergic synapse,nucleoplasm,nucleus,presynapse,transcriptional repressor complex	chromatin silencing,negative regulation of histone acetylation,negative regulation of histone H4 acetylation,negative regulation of transcription, DNA-templated,negative regulation of transcription from RNA polymerase II promoter,positive regulation of histone deacetylation,presynapse to nucleus signaling pathway,regulation of cell cycle,white fat cell differentiation	chromatin binding,identical protein binding,NAD binding,oxidoreductase activity, acting on the CH-OH group of donors, NAD or NADP as acceptor,PDZ domain binding,protein domain specific binding,protein homodimerization activity,repressing transcription factor binding,RNA polymerase II transcription corepressor binding,transcription corepressor activity,transcription factor binding	1.16419e-10	5843.19	5641.93	5830.94	6133.82	5859.38	5861.85	6014.63	6136.8	5135.95	5165.07	5416.52	5573.79	1.05168	0.237579	0.0726972	0.624192
O88735	Map7	Mus musculus	Ensconsin	axon,basolateral plasma membrane,cytosol,microtubule,microtubule cytoskeleton,perinuclear region of cytoplasm,plasma membrane	cell morphogenesis,cell proliferation,fertilization,germ cell development,glycosphingolipid metabolic process,homeostasis of number of cells,Leydig cell differentiation,microtubule bundle formation,microtubule cytoskeleton organization,nucleus organization,organ growth,protein localization to plasma membrane,response to osmotic stress,response to retinoic acid,Sertoli cell development,spermatogen…	receptor binding	8.39239e-08	6146.02	5482.32	6592.21	5244.42	5623.67	5817.73	5506.6	4953.11	5125.9	7779.26	5724.39	5817.85	0.999979	0.999831	-3.05858e-05	7.34374e-05
O88737	Bsn	Mus musculus	Protein bassoon	axon,axon cytoplasm,cell surface,cytoskeleton of presynaptic active zone,dendrite,excitatory synapse,extrinsic component of membrane,GABA-ergic synapse,glutamatergic synapse,Golgi-associated vesicle,hippocampal mossy fiber to CA3 synapse,inhibitory synapse,neuronal cell body,neuron projection terminus,piccolo-bassoon transport vesicle,postsynaptic density,presynapse,presynaptic active zone,presyn…	axo-dendritic transport,presynapse to nucleus signaling pathway,presynaptic active zone assembly,protein localization to synapse,regulation of ubiquitin protein ligase activity,retrograde axonal transport,synapse organization	dynein light chain binding,metal ion binding,structural constituent of presynaptic active zone,transcription corepressor binding	1.36186e-18	4318.85	4300.48	4228.58	3879.98	3743.82	4094.34	3681.6	3695.68	4643.14	4379.19	4605.87	4201.1	0.974588	0.673976	-0.0371349	0.171356
O88738	Birc6	Mus musculus	Baculoviral IAP repeat-containing protein 6	endosome,Flemming body,membrane,microtubule organizing center,midbody,nucleus,spindle pole,trans-Golgi network	apoptotic process,cell cycle,cell division,labyrinthine layer development,negative regulation of apoptotic process,negative regulation of extrinsic apoptotic signaling pathway,placenta development,positive regulation of cell proliferation,protein ubiquitination,regulation of cell proliferation,regulation of cytokinesis,spongiotrophoblast layer development,ubiquitin-dependent protein catabolic pro…	cysteine-type endopeptidase inhibitor activity,ubiquitin conjugating enzyme activity,ubiquitin-protein transferase activity	7.86507e-07	296.553	324.956	296.566	204.647	228.728	270.29	241.767	259.329	304.892	261.288	313.919	276.239	0.978465	0.829776	-0.0314077	0.0810393
O88741	Gdap1	Mus musculus	Ganglioside-induced differentiation-associated protein 1	cytosol,integral component of mitochondrial outer membrane,mitochondrion	cellular response to vitamin D,mitochondrial fission,mitochondrial fusion,mitochondrion organization,protein targeting to mitochondrion,response to retinoic acid		2.19094e-15	1108.29	1284.5	1126.03	824.506	892.752	1047.22	685.149	887.375	921.932	1134.13	949.173	915.552	1.14381	0.266078	0.193845	0.574991
O88745	Scrg1	Mus musculus	Scrapie-responsive protein 1	cytoplasm,extracellular region,Golgi apparatus,neuron projection terminus	mesenchymal stem cell proliferation		5.89491e-13	776.697	614.095	619.944	693.24	657.643	672.324	636.774	708.184	610.499	595.823	605.71	631.398	1.06482	0.288933	0.0906061	0.539204
O88746	Tom1	Mus musculus	Target of Myb protein 1	cytoplasm,cytosol,early endosome,endosome,membrane	intracellular protein transport	clathrin binding	6.76674e-16	1224.09	1086.27	1367.53	1218.89	1326.46	1244.65	1060.33	1162.95	1149.06	1134.8	1066.29	1114.69	1.11659	0.0411622	0.159098	1.3855
O88796	Rpp30	Mus musculus	Ribonuclease P protein subunit p30	multimeric ribonuclease P complex,nucleolar ribonuclease P complex,ribonuclease MRP complex	RNA phosphodiester bond hydrolysis, endonucleolytic,rRNA processing,tRNA 5'-leader removal,tRNA processing	ribonuclease P activity,ribonuclease P RNA binding,RNA binding	0.000152999	26.1646	37.3917	62.2851	22.9517	31.7628	36.1112	56.1584	54.7154	49.225	NaN	63.5883	55.9218	0.645744	0.0492861	-0.630965	1.30728
O88809	Dcx	Mus musculus	Neuronal migration protein doublecortin	axon,axoneme,cytoplasm,dendrite,growth cone,microtubule,neuronal cell body,neuron projection	axoneme assembly,axon extension,brain development,central nervous system projection neuron axonogenesis,dendrite morphogenesis,hippocampus development,intracellular signal transduction,layer formation in cerebral cortex,neuron migration,photoreceptor cell development,positive regulation of collateral sprouting,positive regulation of endocytosis,pyramidal neuron development,retina development in c…	microtubule binding,protein kinase binding	0.00361644	NaN	10.4737	NaN	NaN	NaN	10.4737	NaN	NaN	NaN	10.9871	NaN	10.9871	0.953272	#DIV/0!	-0.06904	#DIV/0!
O88811	Stam2	Mus musculus	Signal transducing adapter molecule 2	cytoplasm,cytosol,early endosome membrane,endocytic vesicle,intracellular membrane-bounded organelle,nucleoplasm	intracellular protein transport,signal transduction		2.72277e-05	161.196	129.916	166.296	155.047	131.313	148.754	123.297	168.67	156.078	154.713	144.551	149.462	0.995262	0.949088	-0.00685109	0.0226937
O88834	Shd	Mus musculus	SH2 domain-containing adapter protein D			phosphotyrosine binding	2.76171e-06	307.58	51.9712	374.394	239.202	436.354	281.9	382.206	324.53	192.49	NaN	360.467	314.924	0.895138	0.705518	-0.159817	0.151492
O88844	Idh1	Mus musculus	Isocitrate dehydrogenase [NADP] cytoplasmic	cytoplasm,cytosol,mitochondrion,peroxisome	2-oxoglutarate metabolic process,female gonad development,glutathione metabolic process,glyoxylate cycle,isocitrate metabolic process,NADP metabolic process,regulation of phospholipid biosynthetic process,regulation of phospholipid catabolic process,response to organic cyclic compound,response to oxidative stress,response to steroid hormone,tricarboxylic acid cycle	identical protein binding,isocitrate dehydrogenase (NADP+) activity,isocitrate dehydrogenase activity,magnesium ion binding,NAD binding,NADP binding,protein homodimerization activity	4.04023e-16	2761.86	2779.49	2968.84	3061.22	2738.85	2862.05	3008.5	2782.87	2695.34	2977.52	2832.86	2859.42	1.00092	0.976708	0.0013276	0.0102351
O88845	Akap10	Mus musculus	A-kinase anchor protein 10, mitochondrial	cytosol,mitochondrion,plasma membrane,macromolecular complex	protein localization	protein kinase A binding	1.58553e-14	596.091	636.608	629.166	598.379	649.287	621.906	612.353	584.789	597.407	541.668	604.59	588.161	1.05737	0.0730401	0.0804855	1.13644
O88848	Arl6	Mus musculus	ADP-ribosylation factor-like protein 6	axonemal microtubule,axoneme,ciliary membrane,cilium,cytoplasm,cytosol,membrane,membrane coat	brain development,cilium morphogenesis,fat cell differentiation,intracellular protein transport,protein ADP-ribosylation,protein localization to cilium,protein localization to nonmotile primary cilium,protein polymerization,protein targeting to membrane,protein transport from ciliary membrane to plasma membrane,Ras protein signal transduction,regulation of smoothened signaling pathway,retina laye…	GTPase activity,GTP binding,metal ion binding,phospholipid binding	4.46733e-10	416.453	357.912	421.03	407.444	441.406	408.849	459.54	465.037	456.617	491.077	415.5	457.554	0.893554	0.0297912	-0.162374	1.52591
O88851	Rbbp9	Mus musculus	Putative hydrolase RBBP9	nucleoplasm	regulation of cell proliferation	hydrolase activity	8.55025e-17	2294.34	2021.16	2344.36	2414.84	2278.15	2270.57	2392.39	2609.87	2204.73	2291.76	2171.3	2334.01	0.97282	0.556332	-0.039755	0.254666
O88878	Zfand5	Mus musculus	AN1-type zinc finger protein 5	cytoplasm	face development,fibroblast migration,in utero embryonic development,platelet-derived growth factor receptor signaling pathway,respiratory system process,skeletal system morphogenesis,smooth muscle tissue development,vasculature development	DNA binding,zinc ion binding	0.00135025	65.9176	NaN	48.8555	30.196	38.5287	45.8745	40.2346	32.5346	115.411	48.061	26.945	52.6372	0.871522	0.738398	-0.198391	0.13171
O88910	Mpp3	Mus musculus	MAGUK p55 subfamily member 3			PDZ domain binding	6.43391e-15	1661.25	1403.62	1671.89	1648.3	1507.39	1578.49	1567.24	1448.54	1494.81	1563.76	1476.28	1510.13	1.04527	0.272737	0.0638778	0.564257
O88935	Syn1	Mus musculus	Synapsin-1	anchored component of synaptic vesicle membrane,axon,cytoskeleton,cytosol,dendrite,extrinsic component of synaptic vesicle membrane,Golgi apparatus,intracellular organelle,myelin sheath,postsynaptic density,presynapse,presynaptic active zone,Schaffer collateral - CA1 synapse,synapse,synaptic vesicle,synaptic vesicle membrane,synaptonemal complex	neuron development,neurotransmitter secretion,regulation of short-term neuronal synaptic plasticity,regulation of synaptic vesicle cycle,synapse organization,synaptic vesicle clustering,synaptic vesicle cycle	actin binding,ATP binding,calcium-dependent protein binding,identical protein binding,protein kinase binding	4.50446e-17	29389.4	27731.3	29029.2	28084.1	28167.8	28480.4	27922.2	27095.7	29067.1	30500.5	30923.4	29101.8	0.978647	0.456848	-0.031139	0.340228
O88939	Zbtb7a	Mus musculus	Zinc finger and BTB domain-containing protein 7A	cytoplasm,DNA-dependent protein kinase complex,nucleus,NuRD complex	B cell differentiation,cartilage development,cellular response to DNA damage stimulus,chromatin organization,chromatin remodeling,double-strand break repair via classical nonhomologous end joining,erythrocyte maturation,fat cell differentiation,negative regulation of androgen receptor signaling pathway,negative regulation of Notch signaling pathway,negative regulation of transcription, DNA-templa…	activating transcription factor binding,androgen receptor binding,DNA binding,transcription factor activity, sequence-specific DNA binding,transcriptional repressor activity, RNA polymerase II transcription regulatory region sequence-specific binding,histone acetyltransferase binding,metal ion binding,RNA polymerase II core promoter proximal region sequence-specific DNA binding,sequence-specific …	0.000189718	166.771	74.188	116.528	75.1687	56.7134	97.8739	36.4468	68.7264	131.103	131.146	110.106	95.5057	1.0248	0.932814	0.0353374	0.030205
O88951	Lin7b	Mus musculus	Protein lin-7 homolog B	basolateral plasma membrane,bicellular tight junction,cell-cell junction,MPP7-DLG1-LIN7 complex,plasma membrane,postsynaptic density membrane,presynapse,synapse	exocytosis,maintenance of epithelial cell apical/basal polarity,neurotransmitter secretion,protein localization to basolateral plasma membrane,protein transport	L27 domain binding,PDZ domain binding,protein domain specific binding	3.98555e-08	1054.74	787.927	1073.37	900.854	677.479	898.874	687.601	938.893	1031.18	1186.91	1006.78	970.272	0.926414	0.540082	-0.110271	0.26754
O88952	Lin7c	Mus musculus	Protein lin-7 homolog C	basolateral plasma membrane,bicellular tight junction,cell-cell junction,cytoplasm,glutamatergic synapse,MPP7-DLG1-LIN7 complex,plasma membrane,postsynaptic density membrane,presynapse,synapse	exocytosis,maintenance of epithelial cell apical/basal polarity,morphogenesis of an epithelial sheet,neurotransmitter secretion,protein localization to basolateral plasma membrane,protein transport	cytoskeletal protein binding,L27 domain binding,PDZ domain binding,protein domain specific binding	6.44979e-09	2861.14	2473.68	2718.97	2857.31	2746.89	2731.6	2919.24	2770.02	2551.98	2519.03	2227.74	2597.6	1.05158	0.35811	0.0725645	0.445983
O88958	Gnpda1	Mus musculus	Glucosamine-6-phosphate isomerase 1	cytoplasm	acrosome reaction,fructose 6-phosphate metabolic process,fructose biosynthetic process,generation of precursor metabolites and energy,glucosamine catabolic process,glucosamine metabolic process,N-acetylglucosamine catabolic process,N-acetylneuraminate catabolic process,UDP-N-acetylglucosamine biosynthetic process	glucosamine-6-phosphate deaminase activity,identical protein binding	2.88017e-14	839.409	818.56	786.329	948.277	828.024	844.12	872.908	797.728	762.291	861.445	760.951	811.065	1.04076	0.390824	0.0576307	0.408019
O88967	Yme1l1	Mus musculus	ATP-dependent zinc metalloprotease YME1L1	integral component of membrane,mitochondrial inner membrane,mitochondrion,nuclear body	cell proliferation,mitochondrial protein catabolic process,mitochondrial protein processing,mitochondrion organization,negative regulation of apoptotic process,protein hexamerization,misfolded or incompletely synthesized protein catabolic process,proteolysis	ATP binding,ATP-dependent peptidase activity,metal ion binding,metalloendopeptidase activity	8.97608e-05	104.451	127.058	124.575	144.239	63.8081	112.826	103.737	84.7552	123.26	96.0797	112.226	104.011	1.08475	0.579976	0.117362	0.23659
O88974	Setdb1	Mus musculus	Histone-lysine N-methyltransferase SETDB1	chromosome,cytoplasm,host cell nucleus,intracellular membrane-bounded organelle,nucleoplasm,nucleus	bone development,heterochromatin organization,histone H3-K9 methylation,histone H3-K9 trimethylation,inner cell mass cell proliferation,negative regulation of gene expression,negative regulation of single stranded viral RNA replication via double stranded DNA intermediate,negative regulation of transcription from RNA polymerase II promoter,positive regulation of methylation-dependent chromatin si…	chromatin binding,DNA binding,histone-lysine N-methyltransferase activity,histone methyltransferase activity (H3-K9 specific),promoter-specific chromatin binding,zinc ion binding	1.10905e-08	349.654	320.822	228.375	356.629	401.985	331.493	385.026	257.986	279.207	276.027	282.686	296.187	1.1192	0.363943	0.162473	0.438967
O88983	Stx8	Mus musculus	Syntaxin-8	cytosol,early endosome,endomembrane system,endosome,integral component of membrane,late endosome,late endosome membrane,lysosomal membrane,perinuclear region of cytoplasm,phagocytic vesicle,recycling endosome,SNARE complex,trans-Golgi network,vesicle	cellular response to interferon-gamma,early endosome to late endosome transport,endosome to lysosome transport,intracellular protein transport,regulation of protein localization to plasma membrane,vesicle docking,vesicle fusion,vesicle-mediated transport	chloride channel inhibitor activity,SNAP receptor activity,SNARE binding,syntaxin binding,ubiquitin protein ligase binding	3.2069e-07	158.969	198.123	128.168	94.7175	98.4213	135.68	89.9839	110.094	103.799	133.835	160.329	119.608	1.13437	0.505721	0.181892	0.296089
O88986	Gcat	Mus musculus	2-amino-3-ketobutyrate coenzyme A ligase, mitochondrial	mitochondrial inner membrane,mitochondrion,nuclear speck,nucleoplasm	biosynthetic process,L-threonine catabolic process to glycine	glycine C-acetyltransferase activity,pyridoxal phosphate binding	1.23359e-14	314.966	254	302.469	325.079	247.583	288.819	278.454	330.084	316.579	325.075	327.486	315.536	0.91533	0.188825	-0.127636	0.723941
O88998	Olfm1	Mus musculus	Noelin	AMPA glutamate receptor complex,axon,axonal growth cone,endoplasmic reticulum,extracellular space,extrinsic component of synaptic membrane,glutamatergic synapse,neuronal cell body,perikaryon,synaptic membrane	atrioventricular valve formation,cardiac epithelial to mesenchymal transition,negative regulation of beta-amyloid formation,negative regulation of gene expression,negative regulation of neuron migration,neuronal signal transduction,positive regulation of apoptotic process,positive regulation of epithelial to mesenchymal transition,positive regulation of gene expression,regulation of beta-amyloid …	beta-amyloid binding,identical protein binding	9.66854e-14	2132.6	2070.11	2093.26	2124.33	2180.11	2120.08	2295.34	2256.23	2283.03	2269.41	2365.07	2293.82	0.924261	0.000184162	-0.113628	3.7348
O89001	Cpd	Mus musculus	Carboxypeptidase D	extracellular space,integral component of membrane,intracellular membrane-bounded organelle,nucleus,perinuclear region of cytoplasm,plasma membrane,trans-Golgi network	peptide metabolic process,protein processing	metallocarboxypeptidase activity,macromolecular complex binding,protein phosphatase 2A binding,zinc ion binding	1.57594e-09	106.445	100.575	68.3777	53.9979	85.6225	83.0037	50.2274	64.8231	85.2073	86.6776	74.672	72.3215	1.1477	0.396388	0.198751	0.40188
O89013	Leprot	Mus musculus	Leptin receptor gene-related protein	endosome,endosome membrane,Golgi apparatus,Golgi membrane,integral component of membrane	late endosome to vacuole transport via multivesicular body sorting pathway,negative regulation of growth hormone receptor signaling pathway,negative regulation of protein localization to cell surface,negative regulation of JAK-STAT cascade	receptor binding	4.39474e-05	10.6145	21.9287	11.7769	NaN	15.8972	15.0543	6.32749	13.8678	17.8246	29.3267	30.2769	19.5247	0.771037	0.455908	-0.375128	0.341123
O89017	Lgmn	Mus musculus	Legumain	apical part of cell,cytoplasm,extracellular region,late endosome,lysosome,perinuclear region of cytoplasm	activation of cysteine-type endopeptidase activity,associative learning,cellular response to beta-amyloid,cellular response to calcium ion,cellular response to hepatocyte growth factor stimulus,dendritic spine organization,memory,negative regulation of ERBB signaling pathway,negative regulation of gene expression,negative regulation of multicellular organism growth,negative regulation of neuron a…	cysteine-type endopeptidase activity,peptidase activity	9.47209e-13	288.089	254.591	211.724	287.362	253.301	259.013	291.355	254.286	291.85	259.944	285.435	276.574	0.936507	0.309627	-0.0946385	0.509161
O89023	Tpp1	Mus musculus	Tripeptidyl-peptidase 1	Golgi apparatus,lysosome,melanosome,membrane raft,mitochondrion,recycling endosome	bone resorption,central nervous system development,epithelial cell differentiation,lysosome organization,nervous system development,neuromuscular process controlling balance,peptide catabolic process,protein localization to chromosome, telomeric region,proteolysis	endopeptidase activity,lysophosphatidic acid binding,metal ion binding,peptidase activity,peptide binding,serine-type endopeptidase activity,serine-type peptidase activity,sulfatide binding,tripeptidyl-peptidase activity	9.437e-10	1073.22	914.16	1003.82	1025.59	841.298	971.619	913.297	979.684	846.164	1091.28	871.822	940.449	1.03314	0.620283	0.0470419	0.20741
O89026	Robo1	Mus musculus	Roundabout homolog 1	axolemma,axon,cell surface,cytoplasm,endoplasmic reticulum-Golgi intermediate compartment membrane,integral component of membrane,neuronal cell body,plasma membrane	activation of cysteine-type endopeptidase activity involved in apoptotic process,aorta development,aortic valve morphogenesis,axon guidance,axon midline choice point recognition,cell migration involved in sprouting angiogenesis,chemorepulsion involved in postnatal olfactory bulb interneuron migration,coronary vasculature development,endocardial cushion formation,heart development,homophilic cell …	axon guidance receptor activity,identical protein binding,LRR domain binding	6.79793e-12	111.049	103.877	79.5644	42.3273	71.9941	81.7624	60.4664	37.8946	78.8886	111.269	67.0984	71.1235	1.14958	0.553131	0.201112	0.257172
O89029	Matn4	Mus musculus	Matrilin-4	collagen-containing extracellular matrix	response to axon injury	calcium ion binding	0.0068658	15.8593	NaN	27.9832	15.1021	21.7406	20.1713	29.517	43.6564	37.3639	NaN	33.5388	36.019	0.560018	0.00970952	-0.836454	2.0128
O89032	Sh3pxd2a	Mus musculus	SH3 and PX domain-containing protein 2A	cell junction,cell projection,cytoplasm,podosome	osteoclast fusion,reactive oxygen species metabolic process,superoxide metabolic process	phosphatidylinositol-3,4-bisphosphate binding,phosphatidylinositol-3-phosphate binding,phosphatidylinositol-4,5-bisphosphate binding,phosphatidylinositol-4-phosphate binding,phosphatidylinositol-5-phosphate binding,phosphatidylinositol binding,protease binding,superoxide-generating NADPH oxidase activator activity	0.000445384	63.3189	94.287	59.5276	59.2419	98.6777	75.0106	NaN	96.9056	NaN	93.7778	57.6071	82.7635	0.906325	0.622377	-0.1419	0.205947
O89050	Mkln1	Mus musculus	Muskelin	cell cortex,cytoplasm,cytosol,nucleoplasm,postsynapse,ruffle,ubiquitin ligase complex	actin cytoskeleton reorganization,cell-matrix adhesion,regulation of cell shape,regulation of receptor internalization	identical protein binding,protein homodimerization activity	1.73816e-06	161.708	118.372	171.827	144.391	141.348	147.529	185.233	179.731	150.635	166.72	194.52	175.368	0.841255	0.0482917	-0.249385	1.31613
O89051	Itm2b	Mus musculus	Integral membrane protein 2B	endosome membrane,extracellular space,Golgi apparatus,Golgi-associated vesicle membrane,Golgi membrane,integral component of organelle membrane,intracellular membrane-bounded organelle,plasma membrane	negative regulation of amyloid precursor protein biosynthetic process	beta-amyloid binding,ATP binding	1.78997e-10	280.941	357.461	199.277	303.603	285.811	285.418	283.047	304.271	273.094	299.476	252.766	282.531	1.01022	0.917782	0.0146715	0.0372605
O89053	Coro1a	Mus musculus	Coronin-1A	actin filament,axon,cell-cell junction,cell leading edge,cortical actin cytoskeleton,cytoplasm,cytosol,early endosome,glutamatergic synapse,immunological synapse,lamellipodium,phagocytic cup,phagocytic vesicle,phagocytic vesicle membrane,plasma membrane,macromolecular complex,stereocilium tip,synapse	actin cytoskeleton organization,actin filament organization,calcium ion transport,cell migration,cell-substrate adhesion,cellular response to interleukin-4,early endosome to recycling endosome transport,homeostasis of number of cells within a tissue,leukocyte chemotaxis,natural killer cell degranulation,negative regulation of actin nucleation,negative regulation of neuron apoptotic process,negati…	actin binding,actin filament binding,actin monomer binding,cytoskeletal protein binding,identical protein binding,myosin heavy chain binding,phosphatidylinositol 3-kinase binding,protein C-terminus binding,protein homodimerization activity	9.54252e-16	10333.7	9857.47	10499.6	9721	9782.89	10038.9	10112.9	9808.87	10207.6	10377.4	10429.1	10187.2	0.985447	0.46373	-0.0211495	0.333734
O89079	Cope	Mus musculus	Coatomer subunit epsilon	COPI-coated vesicle,COPI vesicle coat,Golgi apparatus,Golgi membrane,nucleoplasm	ER to Golgi vesicle-mediated transport,intra-Golgi vesicle-mediated transport,protein localization to axon,protein transport,retrograde vesicle-mediated transport, Golgi to ER	structural molecule activity	4.70483e-08	874.007	687.598	781.823	817.332	734.988	779.149	722.654	801.834	705.661	752.946	719.168	740.453	1.05226	0.320473	0.0734927	0.494208
O89084	Pde4a	Mus musculus	cAMP-specific 3',5'-cyclic phosphodiesterase 4A	cytoplasm,cytosol,membrane,nucleoplasm,nucleus,perinuclear region of cytoplasm,plasma membrane,Schaffer collateral - CA1 synapse	cAMP catabolic process,cellular response to drug,modulation of synaptic transmission,regulation of cAMP-mediated signaling,regulation of protein kinase A signaling,sensory perception of smell,signal transduction	3',5'-cyclic-AMP phosphodiesterase activity,cAMP binding,metal ion binding	2.56711e-18	243.192	226.325	262.969	323.33	249.648	261.093	208.186	233.899	248.27	253.934	211.435	231.145	1.12956	0.154949	0.175765	0.809811
O89086	Rbm3	Mus musculus	RNA-binding protein 3	cytoplasm,dendrite,nucleoplasm,nucleus,spliceosomal complex	positive regulation of mRNA splicing, via spliceosome,positive regulation of translation,production of miRNAs involved in gene silencing by miRNA,regulation of translation,response to cold,translation	ribosomal large subunit binding,RNA binding	1.01492e-18	1025.52	830.315	949.459	1020.43	1006.64	966.474	1096.45	1343.87	1166.12	867.714	983.464	1091.52	0.885436	0.196932	-0.17554	0.705683
O89106	Fhit	Mus musculus	Bis(5'-adenosyl)-triphosphatase	cytoplasm,cytosol,fibrillar center,nucleus,plasma membrane	diadenosine triphosphate catabolic process,DNA replication,intrinsic apoptotic signaling pathway by p53 class mediator,negative regulation of proteasomal ubiquitin-dependent protein catabolic process,nucleotide metabolic process,purine nucleotide metabolic process	bis(5'-adenosyl)-triphosphatase activity,catalytic activity,hydrolase activity,identical protein binding,nickel cation binding,nucleotide binding,ubiquitin protein ligase binding	6.46829e-12	206.894	138.927	140.502	145.15	178.617	162.018	181.321	180.342	146.347	128.797	155.4	158.441	1.02257	0.836195	0.0322061	0.0776923
O89112	Lancl1	Mus musculus	Glutathione S-transferase LANCL1	cytoplasm,plasma membrane	regulation of neuron apoptotic process,regulation of oxidative stress-induced neuron death	glutathione binding,glutathione transferase activity,low-density lipoprotein particle receptor binding,SH3 domain binding,zinc ion binding	3.99556e-11	4964.37	5168.33	4840.6	5044.91	4745.53	4952.75	4657.78	4890.73	5049.53	4967.62	4866.54	4886.44	1.01357	0.522368	0.0194452	0.282024
O89114	Dnajb5	Mus musculus	DnaJ homolog subfamily B member 5	cytosol,nucleus	chaperone mediated protein folding requiring cofactor,negative regulation of transcription from RNA polymerase II promoter,response to unfolded protein	chaperone binding,unfolded protein binding	6.74292e-06	299.484	314.247	259.728	266.055	287.43	285.389	345.148	210.377	226.458	270.117	230.054	256.431	1.11293	0.303007	0.15436	0.518547
O89116	Vti1a	Mus musculus	Vesicle transport through interaction with t-SNAREs homolog 1A	autophagosome,clathrin-coated vesicle,cytosol,endoplasmic reticulum membrane,endosome,ER to Golgi transport vesicle membrane,Golgi apparatus,Golgi membrane,integral component of membrane,intracellular membrane-bounded organelle,late endosome membrane,neuronal cell body,neuron projection terminus,perinuclear region of cytoplasm,SNARE complex,synaptic vesicle	autophagy,ER to Golgi vesicle-mediated transport,Golgi ribbon formation,Golgi to vacuole transport,intra-Golgi vesicle-mediated transport,protein targeting to vacuole,retrograde transport, endosome to Golgi,synaptic vesicle to endosome fusion,vesicle fusion with Golgi apparatus,voluntary musculoskeletal movement	SNAP receptor activity,SNARE binding	0.000104684	263.228	258.173	191.422	109.553	137.973	192.07	99.4793	189.144	213.307	261.316	178.634	188.376	1.01961	0.929902	0.0280128	0.0315629
P00158	Mt-Cyb	Mus musculus	Cytochrome b	integral component of mitochondrial inner membrane,membrane,mitochondrial inner membrane,mitochondrion,macromolecular complex,respiratory chain complex III	animal organ regeneration,electron transport coupled proton transport,hyperosmotic salinity response,respiratory electron transport chain,response to cadmium ion,response to calcium ion,response to cobalamin,response to copper ion,response to drug,response to ethanol,response to glucagon,response to heat,response to hyperoxia,response to hypoxia,response to mercury ion,response to toxic substance	metal ion binding,macromolecular complex binding,ubiquinol-cytochrome-c reductase activity	7.31316e-10	2815.29	2608.74	1606.38	1169.96	1058.49	1851.77	626.86	1789.82	2703.48	3328.37	3186.31	2326.97	0.795787	0.466254	-0.329545	0.331377
P00375	Dhfr	Mus musculus	Dihydrofolate reductase	cytoplasm,cytosol,mitochondrion	axon regeneration,dihydrofolate metabolic process,folic acid metabolic process,negative regulation of translation,one-carbon metabolic process,oxidation-reduction process,positive regulation of nitric-oxide synthase activity,regulation of removal of superoxide radicals,response to methotrexate,response to nicotine,tetrahydrobiopterin biosynthetic process,tetrahydrofolate biosynthetic process,tetr…	dihydrofolate reductase activity,dihydrofolic acid binding,drug binding,folic acid binding,methotrexate binding,mRNA binding,NADP binding,NADPH binding,sequence-specific mRNA binding,translation repressor activity, nucleic acid binding	1.38791e-05	206.087	163.981	215.641	167.898	201.774	191.076	178.848	174.54	112.725	123.644	206.336	159.219	1.20009	0.160459	0.263138	0.794635
P00397	Mtco1	Mus musculus	Cytochrome c oxidase subunit 1	integral component of membrane,mitochondrial inner membrane,mitochondrial respiratory chain complex III,mitochondrial respiratory chain complex IV,mitochondrion,respiratory chain complex IV	aerobic respiration,aging,cerebellum development,electron transport coupled proton transport,mitochondrial electron transport, cytochrome c to oxygen,respiratory electron transport chain,response to copper ion,response to electrical stimulus,response to oxidative stress	cytochrome-c oxidase activity,heme binding,metal ion binding	1.6841e-12	1979.38	2166.53	1604.33	1229.23	1244.94	1644.88	979.39	1670.07	1979.67	1924.07	1862.01	1683.04	0.977325	0.888551	-0.0330897	0.0513176
P00405	Mtco2	Mus musculus	Cytochrome c oxidase subunit 2	integral component of membrane,mitochondrial inner membrane,mitochondrion,respiratory chain complex IV	ATP synthesis coupled electron transport,lactation,positive regulation of ATP biosynthetic process,positive regulation of hydrogen peroxide biosynthetic process,positive regulation of necrotic cell death,response to cold	copper ion binding,cytochrome-c oxidase activity	5.25969e-10	14945.4	15345.3	15929.9	11038.1	10488	13549.3	7869.53	15109.6	14764.1	14558.6	13245.4	13109.5	1.03356	0.810247	0.0476156	0.0913824
P00416	mt-Co3	Mus musculus	Cytochrome c oxidase subunit 3	integral component of membrane,mitochondrial inner membrane,mitochondrion,respiratory chain complex IV	aerobic respiration,mitochondrial electron transport, cytochrome c to oxygen,respiratory chain complex IV assembly	cytochrome-c oxidase activity,electron carrier activity,oxidoreduction-driven active transmembrane transporter activity	1.12011e-11	264.893	480.872	175.571	103.459	159.29	236.817	131.887	175.397	235.129	323.166	266.539	226.423	1.0459	0.892241	0.0647502	0.0495179
P00493	Hprt1	Mus musculus	Hypoxanthine-guanine phosphoribosyltransferase	cytoplasm,cytosol	adenine metabolic process,adenine salvage,central nervous system neuron development,cerebral cortex neuron differentiation,dendrite morphogenesis,dopamine metabolic process,GMP catabolic process,GMP salvage,grooming behavior,guanine salvage,hypoxanthine metabolic process,hypoxanthine salvage,IMP metabolic process,IMP salvage,locomotory behavior,lymphocyte proliferation,positive regulation of dopa…	guanine phosphoribosyltransferase activity,hypoxanthine phosphoribosyltransferase activity,identical protein binding,magnesium ion binding,nucleotide binding	6.19685e-13	4346.64	3703.74	4299.62	3789.28	3851.92	3998.24	3744.03	4275.34	3777.4	4477.62	3835.07	4021.89	0.994119	0.90922	-0.00850897	0.0413308
P00520	Abl1	Mus musculus	Tyrosine-protein kinase ABL1	actin cytoskeleton,cell leading edge,cytoplasm,cytosol,dendrite,endoplasmic reticulum,growth cone,mitochondrion,neuronal cell body,neuron projection,nuclear body,nucleolus,nucleoplasm,nucleus,perinuclear region of cytoplasm,macromolecular complex,ruffle,synapse	actin cytoskeleton organization,actin filament branching,activated T cell proliferation,activation of protein kinase C activity,alpha-beta T cell differentiation,apoptotic process,autophagy,B-1 B cell homeostasis,B cell proliferation,B cell proliferation involved in immune response,B cell receptor signaling pathway,Bergmann glial cell differentiation,cardiovascular system development,cellular res…	actin filament binding,ATP binding,bubble DNA binding,delta-catenin binding,ephrin receptor binding,four-way junction DNA binding,kinase activity,magnesium ion binding,manganese ion binding,mitogen-activated protein kinase binding,neuropilin binding,non-membrane spanning protein tyrosine kinase activity,phosphotyrosine binding,proline-rich region binding,protein C-terminus binding,protein domain …	0.00598837	NaN	16.5622	NaN	NaN	NaN	16.5622	NaN	NaN	NaN	NaN	8.12394	8.12394	2.0387	#DIV/0!	1.02765	#DIV/0!
P00848	Mtatp6	Mus musculus	ATP synthase subunit a	integral component of membrane,mitochondrial proton-transporting ATP synthase complex,mitochondrion,proton-transporting ATP synthase complex, coupling factor F(o)	aging,ATP synthesis coupled proton transport,mitochondrial ATP synthesis coupled proton transport,response to hyperoxia	proton-transporting ATP synthase activity, rotational mechanism	2.50606e-10	151.035	74.7143	130.85	49.6343	44.5341	90.1534	21.5066	47.9994	159.385	131.699	101.44	92.4061	0.975622	0.948025	-0.0356059	0.0231801
P00920	Ca2	Mus musculus	Carbonic anhydrase 2	apical part of cell,axon,basolateral plasma membrane,cytoplasm,cytosol,extracellular space,microvillus,myelin sheath,plasma membrane	angiotensin-activated signaling pathway,carbon dioxide transport,cellular response to fluid shear stress,kidney development,morphogenesis of an epithelium,odontogenesis of dentin-containing tooth,one-carbon metabolic process,positive regulation of bone resorption,positive regulation of cellular pH reduction,positive regulation of dipeptide transmembrane transport,positive regulation of osteoclast…	arylesterase activity,carbonate dehydratase activity,hydro-lyase activity,zinc ion binding	1.18943e-10	20193.8	18675.3	20827.8	22221	21330	20649.6	22322.7	22621.5	20491.3	19943.7	21025.4	21280.9	0.970332	0.446324	-0.0434503	0.35035
P01029	C4b	Mus musculus	Complement C4-B	axon,dendrite,extracellular region,extracellular space,neuronal cell body,other organism cell,synapse	complement activation,complement activation, classical pathway,immunoglobulin mediated immune response,inflammatory response,innate immune response	carbohydrate binding,complement binding,complement component C1q binding,endopeptidase inhibitor activity	1.36719e-17	130.929	147.022	148.078	109.516	218.467	150.802	194.324	168.307	153.654	223.612	142.641	176.508	0.854367	0.304374	-0.227072	0.516593
P01831	Thy1	Mus musculus	Thy-1 membrane glycoprotein	anchored component of external side of plasma membrane,anchored component of plasma membrane,apical plasma membrane,axolemma,cell surface,cytosol,dendrite,dendrite membrane,endoplasmic reticulum,external side of plasma membrane,growth cone,membrane raft,myelin sheath,neuronal cell body membrane,plasma membrane	angiogenesis,cell-cell adhesion,cell-cell signaling,cytoskeleton organization,focal adhesion assembly,integrin-mediated signaling pathway,negative regulation of axonogenesis,negative regulation of cell migration,negative regulation of neuron projection regeneration,negative regulation of protein kinase activity,negative regulation of protein tyrosine kinase activity,negative regulation of T cell …	enzyme binding,GPI anchor binding,GTPase activator activity,integrin binding,protein kinase binding	2.23711e-11	44630.4	13330.3	33455	12637.3	13170.9	23444.8	10220.6	26488.6	38108.6	49604.5	48174.1	34519.3	0.67918	0.295219	-0.558134	0.529855
P01864		Mus musculus	Ig gamma-2A chain C region secreted form	extracellular region			1.00736e-09	183.477	180.493	135.949	170.112	247.218	183.45	155.85	NaN	217.318	217.53	182.737	193.359	0.948754	0.695655	-0.075894	0.157606
P01867	Igh-3	Mus musculus	Ig gamma-2B chain C region	external side of plasma membrane,extracellular space,immunoglobulin complex, circulating,integral component of membrane	B cell receptor signaling pathway,complement activation, classical pathway,defense response to bacterium,humoral immune response mediated by circulating immunoglobulin,immunoglobulin mediated immune response,innate immune response,phagocytosis, engulfment,phagocytosis, recognition,positive regulation of B cell activation,positive regulation of immune response,positive regulation of phagocytosis,p…	antigen binding,immunoglobulin receptor binding	3.38627e-05	333.011	258.802	202.522	235.901	211.263	248.3	183.11	NaN	163.384	221.689	301.077	217.315	1.14258	0.437369	0.192295	0.359152
P01872	Ighm	Mus musculus	Immunoglobulin heavy constant mu	B cell receptor complex,cell surface,cytosol,external side of plasma membrane,extracellular space,immunoglobulin complex, circulating,integral component of membrane,membrane,perinuclear region of cytoplasm,plasma membrane	activation of MAPK activity,antigen processing and presentation,B cell affinity maturation,B cell receptor signaling pathway,complement activation, classical pathway,defense response to bacterium,defense response to Gram-negative bacterium,early endosome to late endosome transport,humoral immune response mediated by circulating immunoglobulin,immunoglobulin mediated immune response,innate immune …	antigen binding,identical protein binding,immunoglobulin receptor binding,transmembrane signaling receptor activity	2.81752e-05	117.035	45.4953	90.5339	NaN	100.409	88.3684	108.137	65.4106	86.3054	125.929	NaN	96.4454	0.916253	0.702683	-0.126182	0.153241
P01887	B2m	Mus musculus	Beta-2-microglobulin	cytosol,external side of plasma membrane,extracellular space,Golgi apparatus,HFE-transferrin receptor complex,MHC class I peptide loading complex,MHC class I protein complex,phagocytic vesicle membrane,plasma membrane	amyloid fibril formation,antibacterial humoral response,antigen processing and presentation of endogenous peptide antigen via MHC class I,antigen processing and presentation of exogenous protein antigen via MHC class Ib, TAP-dependent,antimicrobial humoral immune response mediated by antimicrobial peptide,cellular defense response,cellular response to iron(III) ion,cellular response to iron ion,c…	identical protein binding,protein homodimerization activity	1.92128e-12	736.523	551.853	562.799	659.066	638.13	629.674	739.108	707.926	544.639	546.924	546.34	616.987	1.02056	0.824349	0.029365	0.083889
P01899	H2-D1	Mus musculus	H-2 class I histocompatibility antigen, D-B alpha chain	cell surface,endoplasmic reticulum,endoplasmic reticulum exit site,external side of plasma membrane,extracellular space,Golgi apparatus,Golgi medial cisterna,integral component of lumenal side of endoplasmic reticulum membrane,MHC class I peptide loading complex,MHC class I protein complex,phagocytic vesicle membrane,plasma membrane	antigen processing and presentation of endogenous peptide antigen via MHC class Ib,antigen processing and presentation of endogenous peptide antigen via MHC class I via ER pathway, TAP-dependent,immune response,negative regulation of neuron projection development,positive regulation of T cell mediated cytotoxicity	beta-2-microglobulin binding,CD8 receptor binding,peptide antigen binding,peptide binding,macromolecular complex binding,receptor binding,TAP binding,TAP complex binding,T cell receptor binding	5.80075e-15	NaN	NaN	NaN	NaN	NaN	#DIV/0!	NaN	NaN	NaN	NaN	NaN	#DIV/0!	#DIV/0!	#DIV/0!	#DIV/0!	#DIV/0!
P01942	Hba	Mus musculus	Hemoglobin subunit alpha	cytosolic small ribosomal subunit,extracellular space,haptoglobin-hemoglobin complex,hemoglobin complex,myelin sheath	cellular oxidant detoxification,erythrocyte development,hydrogen peroxide catabolic process,in utero embryonic development,response to bacterium,response to stilbenoid	heme binding,iron ion binding,organic acid binding,oxygen binding,oxygen transporter activity,macromolecular complex binding	5.09259e-17	16490.9	6225.76	5599.24	7962.24	5549.83	8365.59	5517.63	8149.1	4867.98	1589.26	4480.73	4920.94	1.7	0.177274	0.765534	0.751354
P02088	Hbb-b1	Mus musculus	Hemoglobin subunit beta-1	haptoglobin-hemoglobin complex,hemoglobin complex,myelin sheath	cellular oxidant detoxification,erythrocyte development,hemopoiesis,hydrogen peroxide catabolic process,oxygen transport,regulation of eIF2 alpha phosphorylation by heme	heme binding,hemoglobin alpha binding,metal ion binding,organic acid binding,oxygen binding,oxygen transporter activity	4.17748e-11	4159.6	1739.91	1731.24	2257.21	1431.9	2263.97	1519	2464.68	1399.03	603.172	1400.38	1477.25	1.53256	0.207955	0.615941	0.68203
P02301;P84244	H3-5;H3-3a	Mus musculus	Histone H3.3C;Histone H3.3	nucleosome,nucleus;Barr body,nuclear chromosome,nuclear chromosome, telomeric region,nuclear nucleosome,nucleoplasm,nucleosome,nucleus,macromolecular complex	nucleosome assembly;brain development,cell proliferation,DNA replication-independent nucleosome assembly,embryo implantation,male gonad development,multicellular organism growth,muscle cell differentiation,negative regulation of chromosome condensation,nucleus organization,oogenesis,osteoblast differentiation,pericentric heterochromatin assembly,positive regulation of cell growth,regulation of ce…	DNA binding,protein heterodimerization activity;nucleosomal DNA binding,protein heterodimerization activity,RNA polymerase II core promoter proximal region sequence-specific DNA binding,RNA polymerase II core promoter sequence-specific DNA binding	1.58826e-10	170.849	199.172	169.982	311.47	194.695	209.234	195.63	235.599	98.9987	94.9246	106.485	146.328	1.4299	0.146733	0.515913	0.833471
P02463	Col4a1	Mus musculus	Collagen alpha-1(IV) chain	basement membrane,collagen-containing extracellular matrix,collagen type IV trimer,extracellular matrix,extracellular region,extracellular space	basement membrane organization,blood vessel morphogenesis,brain development,patterning of blood vessels,cellular response to amino acid stimulus,collagen-activated tyrosine kinase receptor signaling pathway,epithelial cell differentiation,extracellular matrix organization,neuromuscular junction development,renal tubule morphogenesis,retinal blood vessel morphogenesis	extracellular matrix structural constituent,extracellular matrix structural constituent conferring tensile strength,platelet-derived growth factor binding	1.35065e-10	5594.25	4691.74	7059.91	5999.86	5233.81	5715.91	6686	7610.18	7269.84	12917.2	9963.63	8889.38	0.643005	0.0313593	-0.637099	1.50363
P02468	Lamc1	Mus musculus	Laminin subunit gamma-1	basement membrane,collagen-containing extracellular matrix,extracellular matrix,extracellular region,laminin-10 complex,laminin-1 complex,neuromuscular junction,synaptic cleft	animal organ morphogenesis,cell adhesion,cell migration,extracellular matrix disassembly,hemidesmosome assembly,neuron projection development,macromolecular complex assembly,substrate adhesion-dependent cell spreading,tissue development	extracellular matrix structural constituent,glycosphingolipid binding	4.29472e-16	17580.1	15979.5	22123.6	19183.7	15009.3	17975.3	19968.6	25354.5	23581.4	43269.4	31209.8	28676.7	0.626824	0.0364184	-0.673869	1.43868
P02469	Lamb1	Mus musculus	Laminin subunit beta-1	basement membrane,collagen-containing extracellular matrix,extracellular matrix,extracellular region,extracellular space,laminin-10 complex,laminin-1 complex,laminin-2 complex,laminin-8 complex,laminin complex,nucleus,perinuclear region of cytoplasm	animal organ morphogenesis,basement membrane assembly,cell migration,embryo implantation,learning or memory,negative regulation of cell adhesion,neuronal-glial interaction involved in cerebral cortex radial glia guided migration,neuron projection development,odontogenesis,positive regulation of cell migration,substrate adhesion-dependent cell spreading,tissue development	enzyme binding,extracellular matrix structural constituent,glycosphingolipid binding,integrin binding	4.88675e-15	1055.98	1032.74	1481.81	1237.1	1015.41	1164.61	1339.78	1486.27	1507.92	2570.39	1878.95	1756.66	0.662966	0.0383279	-0.592994	1.41649
P02535	Krt10	Mus musculus	Keratin, type I cytoskeletal 10	cell surface,keratin filament	cellular response to calcium ion,epidermis development,epithelial cell differentiation,intermediate filament organization,keratinocyte development,positive regulation of epidermis development,protein heterotetramerization	cytoskeletal protein binding,protein heterodimerization activity,structural molecule activity	1.94867e-12	10628.6	5785.69	8910.63	2770.07	1934.49	6005.9	1296.28	7250.83	6158.32	3541.11	2355.51	4120.41	1.4576	0.379781	0.543594	0.420467
P02798	Mt2	Mus musculus	Metallothionein-2	cytoplasm,cytosol,nucleus	cellular response to cadmium ion,cellular response to copper ion,cellular response to drug,cellular response to erythropoietin,cellular response to interleukin-3,cellular response to zinc ion,cellular zinc ion homeostasis,detoxification of copper ion,negative regulation of growth,nitric oxide mediated signal transduction,response to bacterium	drug binding,metal ion binding,zinc ion binding	4.10696e-08	426.607	234.239	315.203	218.037	264.181	291.653	181.258	317.611	250.405	214.773	237.957	240.401	1.21319	0.276146	0.278811	0.558861
P02802	Mt1	Mus musculus	Metallothionein-1	cytoplasm,cytosol,lysosome,nucleus	cellular metal ion homeostasis,cellular response to cadmium ion,cellular response to chromate,cellular response to copper ion,cellular response to vascular endothelial growth factor stimulus,cellular response to zinc ion,cellular zinc ion homeostasis,detoxification of copper ion,negative regulation of growth,negative regulation of neuron apoptotic process,nitric oxide mediated signal transduction	copper ion binding,metal ion binding,zinc ion binding	3.23943e-11	382.806	231.829	453.392	245.926	354.824	333.755	314.268	499.211	219.93	275.81	181.423	298.128	1.1195	0.621335	0.162858	0.206674
P03888	Mtnd1	Mus musculus	NADH-ubiquinone oxidoreductase chain 1	dendrite,integral component of membrane,mitochondrial membrane,mitochondrial respiratory chain complex I,mitochondrion,neuronal cell body	aerobic respiration,response to drug,response to hydroperoxide,response to organic cyclic compound	NADH dehydrogenase (ubiquinone) activity	1.75262e-07	1545.18	2756.04	1845.76	1362.9	1478.53	1797.68	1043.49	1436.06	2151.36	1972.96	1959.04	1712.58	1.04969	0.80043	0.0699643	0.0966764
P03893	Mtnd2	Mus musculus	NADH-ubiquinone oxidoreductase chain 2	integral component of membrane,mitochondrial respiratory chain complex I,mitochondrion,postsynaptic density	mitochondrial electron transport, NADH to ubiquinone,reactive oxygen species metabolic process	ionotropic glutamate receptor binding,NADH dehydrogenase (ubiquinone) activity,protein kinase binding	6.82944e-11	331.104	449.792	344.926	235.822	248.274	321.984	217.997	262.221	353.57	343.061	242.499	283.87	1.13427	0.44334	0.181759	0.353263
P03899	Mtnd3	Mus musculus	NADH-ubiquinone oxidoreductase chain 3	integral component of membrane,mitochondrial respiratory chain complex I,mitochondrion,NADH dehydrogenase complex	cellular response to glucocorticoid stimulus,response to hormone,response to light intensity,response to oxidative stress	NADH dehydrogenase (ubiquinone) activity	9.40319e-08	1894.63	2234.29	1592.43	1166.5	1047.94	1587.16	886.186	1244.93	1713.93	1576.91	1690.89	1422.57	1.1157	0.562055	0.157945	0.250221
P03903	Mtnd4l	Mus musculus	NADH-ubiquinone oxidoreductase chain 4L	integral component of membrane,mitochondrial membrane,mitochondrion,NADH dehydrogenase complex,respiratory chain	ATP synthesis coupled electron transport	NADH dehydrogenase (ubiquinone) activity	7.28436e-06	86.6695	50.7127	96.4583	NaN	NaN	77.9469	NaN	49.0939	75.9803	54.5868	97.2589	69.23	1.12591	0.638699	0.171094	0.194704
P03911	Mtnd4	Mus musculus	NADH-ubiquinone oxidoreductase chain 4	integral component of membrane,mitochondrial respiratory chain complex I,mitochondrion	aerobic respiration,aging,ATP synthesis coupled electron transport,cerebellum development,electron transport coupled proton transport,in utero embryonic development,response to ethanol,response to hypoxia,response to nicotine	NADH dehydrogenase (ubiquinone) activity,ubiquinone binding	1.67593e-12	1144.15	1725.97	1080.06	674.096	721.361	1069.13	656.99	858.19	1199.18	1184.96	1057.57	991.377	1.07843	0.727591	0.108929	0.138113
P03921	Mtnd5	Mus musculus	NADH-ubiquinone oxidoreductase chain 5	integral component of membrane,mitochondrial respiratory chain complex I,mitochondrion,neuron projection	ATP synthesis coupled electron transport,electron transport coupled proton transport,response to hydrogen peroxide,response to hypoxia,response to organonitrogen compound	NADH dehydrogenase (ubiquinone) activity,NADH dehydrogenase activity	1.6562e-11	2128.99	2543.1	1726.88	1266.84	1331.2	1799.4	1042.95	1513.43	2157.37	1937.36	2068.53	1743.93	1.03181	0.866031	0.0451766	0.0624667
P03930	Mtatp8	Mus musculus	ATP synthase protein 8	integral component of membrane,mitochondrial proton-transporting ATP synthase complex,mitochondrial proton-transporting ATP synthase complex, coupling factor F(o),mitochondrion	ATP synthesis coupled proton transport	hydrogen ion transmembrane transporter activity	1.55528e-08	8478.39	12164.9	8218.46	8612.42	7509.08	8996.65	7263.66	6072.39	8900.95	8531.27	8196.07	7792.87	1.15447	0.245454	0.207234	0.61003
P03995	Gfap	Mus musculus	Glial fibrillary acidic protein	astrocyte end-foot,astrocyte projection,cell body,cell projection,cytoplasm,cytoplasmic side of lysosomal membrane,cytoskeleton,glial cell projection,intermediate filament,intermediate filament cytoskeleton,membrane,myelin sheath	astrocyte development,Bergmann glial cell differentiation,extracellular matrix organization,intermediate filament-based process,intermediate filament organization,long-term synaptic potentiation,negative regulation of neuron projection development,neuron projection regeneration,positive regulation of glial cell proliferation,positive regulation of Schwann cell proliferation,regulation of chaperon…	identical protein binding,integrin binding,kinase binding,structural constituent of cytoskeleton	4.95485e-14	8683.38	11020.3	8991.78	9308.64	9859.36	9572.68	12092.4	7777.3	13515	8254.56	8227.54	9973.34	0.959827	0.756719	-0.0591539	0.121065
P04104	Krt1	Mus musculus	Keratin, type II cytoskeletal 1	collagen-containing extracellular matrix,cornified envelope,keratin filament,membrane	complement activation, lectin pathway,establishment of skin barrier,negative regulation of inflammatory response,peptide cross-linking,protein heterotetramerization	carbohydrate binding,protein heterodimerization activity,structural constituent of epidermis	7.8161e-15	2396.14	1189.32	1666.7	544.161	318.511	1222.96	272.737	1253.75	1156.08	668.803	398.232	749.919	1.63079	0.299097	0.705575	0.524188
P04370	Mbp	Mus musculus	Myelin basic protein	cell periphery,cell projection,compact myelin,cytoplasm,internode region of axon,myelin sheath,neuronal cell body,nucleus,plasma membrane,macromolecular complex	maintenance of blood-brain barrier,MAPK cascade,membrane organization,myelination,negative regulation of heterotypic cell-cell adhesion,positive regulation of chemokine (C-X-C motif) ligand 2 production,positive regulation of interleukin-6 production,positive regulation of metalloendopeptidase activity,response to toxic substance,sensory perception of sound	calmodulin binding,protease binding,structural constituent of myelin sheath	3.01552e-13	76867.8	76313.6	80852.4	80576.8	83049	79531.9	73176.6	80673.4	79010.8	74634.4	68704.8	75240	1.05704	0.122712	0.0800344	0.911114
P04627	Araf	Mus musculus	Serine/threonine-protein kinase A-Raf	cytosol,mitochondrion	negative regulation of apoptotic process,positive regulation of peptidyl-serine phosphorylation,protein phosphorylation,regulation of proteasomal ubiquitin-dependent protein catabolic process,regulation of TOR signaling	ATP binding,MAP kinase kinase kinase activity,metal ion binding,protein kinase activity,protein serine/threonine kinase activity	5.35049e-19	626.69	576.178	635.73	651.704	610.119	620.084	673.886	632.881	620.138	600.704	577.705	621.063	0.998424	0.963389	-0.00227509	0.0161983
P04925	Prnp	Mus musculus	Major prion protein	anchored component of membrane,cell surface,cytoplasm,cytosol,dendrite,endoplasmic reticulum,Golgi apparatus,inclusion body,intracellular membrane-bounded organelle,membrane,membrane raft,mitochondrial outer membrane,nuclear membrane,nucleus,plasma membrane,postsynaptic density,terminal bouton	activation of protein kinase activity,calcium-mediated signaling using intracellular calcium source,cellular copper ion homeostasis,cellular response to beta-amyloid,cellular response to copper ion,cellular response to drug,learning or memory,modulation of age-related behavioral decline,negative regulation of activated T cell proliferation,negative regulation of beta-amyloid formation,negative re…	beta-amyloid binding,aspartic-type endopeptidase inhibitor activity,ATP-dependent protein binding,calcium ion binding,chaperone binding,copper ion binding,cupric ion binding,cuprous ion binding,glycosaminoglycan binding,identical protein binding,ion channel binding,lamin binding,microtubule binding,protease binding,macromolecular complex binding,signaling receptor activity,tubulin binding,type 5 …	8.48745e-15	971.133	569.49	709.167	412.182	503.567	633.108	374.472	582.643	861.767	1081.19	1145.52	809.118	0.782467	0.34669	-0.353898	0.460059
P05063	Aldoc	Mus musculus	Fructose-bisphosphate aldolase C	axon,cytoplasm,cytosol,mitochondrion,postsynaptic cytosol	aging,apoptotic process,epithelial cell differentiation,fructose 1,6-bisphosphate metabolic process,glycolytic process	cytoskeletal protein binding,fructose-bisphosphate aldolase activity,identical protein binding,macromolecular complex binding	3.76893e-11	35830.4	34121.5	37322.6	36343.2	35487	35820.9	35232.1	38267.5	32183.7	31636.2	32309.8	33925.9	1.05586	0.200877	0.0784179	0.69707
P05064	Aldoa	Mus musculus	Fructose-bisphosphate aldolase A	actin cytoskeleton,cytoplasm,cytosol,extracellular exosome,extracellular space,M band,membrane,mitochondrion,myelin sheath,nuclear heterochromatin,plasma membrane,macromolecular complex,sperm fibrous sheath,sperm head,Z disc	ATP biosynthetic process,binding of sperm to zona pellucida,fructose 1,6-bisphosphate metabolic process,fructose metabolic process,glycolytic process,glycolytic process through fructose-6-phosphate,methylglyoxal biosynthetic process,muscle cell cellular homeostasis,positive regulation of cell migration,protein homotetramerization,regulation of cell shape,striated muscle contraction	cytoskeletal protein binding,fructose binding,fructose-bisphosphate aldolase activity,identical protein binding,protease binding	1.86066e-13	67946.9	65816.2	69267.3	68802	67487.5	67864	68428.8	69983.4	67927.3	68446.7	68399.6	68637.2	0.988735	0.297834	-0.0163442	0.526026
P05132	Prkaca	Mus musculus	cAMP-dependent protein kinase catalytic subunit alpha	acrosomal vesicle,axoneme,cAMP-dependent protein kinase complex,centrosome,ciliary base,cytoplasm,cytosol,dendritic spine,Golgi apparatus,intercellular bridge,membrane,mitochondrion,neuromuscular junction,neuron projection,nuclear speck,nucleoplasm,nucleotide-activated protein kinase complex,nucleus,perinuclear region of cytoplasm,plasma membrane,plasma membrane raft,presynapse,macromolecular com…	cellular response to glucose stimulus,cellular response to heat,cellular response to parathyroid hormone stimulus,mesoderm formation,modulation of synaptic transmission,mRNA processing,negative regulation of meiotic cell cycle,negative regulation of smoothened signaling pathway involved in dorsal/ventral neural tube patterning,neural tube closure,peptidyl-serine phosphorylation,peptidyl-threonine…	AMP-activated protein kinase activity,ATP binding,cAMP-dependent protein kinase activity,magnesium ion binding,manganese ion binding,macromolecular complex binding,protein domain specific binding,protein kinase activity,protein kinase A regulatory subunit binding,protein kinase binding,protein serine/threonine/tyrosine kinase activity,protein serine/threonine kinase activity,Rab GTPase binding,ub…	2.60295e-10	761.69	768.059	683.959	606.959	678.445	699.822	717.32	699.61	587.839	700.639	661.352	673.352	1.03931	0.504064	0.0556279	0.297514
P05201	Got1	Mus musculus	Aspartate aminotransferase, cytoplasmic	axon terminus,cytoplasm,cytosol,lysosome,nucleoplasm	2-oxoglutarate metabolic process,aspartate biosynthetic process,aspartate catabolic process,aspartate metabolic process,cellular response to insulin stimulus,cellular response to mechanical stimulus,dicarboxylic acid metabolic process,fatty acid homeostasis,glutamate catabolic process to 2-oxoglutarate,glutamate catabolic process to aspartate,glutamate metabolic process,glycerol biosynthetic proc…	carboxylic acid binding,L-aspartate:2-oxoglutarate aminotransferase activity,L-cysteine:2-oxoglutarate aminotransferase activity,phosphatidylserine decarboxylase activity,pyridoxal phosphate binding	3.82011e-11	39337.4	40245	40358	42384.8	42026.6	40870.4	42457.5	41245.9	39242.7	40178	39719.6	40568.8	1.00743	0.721034	0.0106852	0.142044
P05202	Got2	Mus musculus	Aspartate aminotransferase, mitochondrial	cell surface,mitochondrial inner membrane,mitochondrial matrix,mitochondrion,myelin sheath,perikaryon,plasma membrane,macromolecular complex,sarcolemma,T-tubule	2-oxoglutarate metabolic process,aspartate biosynthetic process,aspartate catabolic process,aspartate metabolic process,cellular amino acid metabolic process,dicarboxylic acid metabolic process,fatty acid transport,female pregnancy,glutamate catabolic process to 2-oxoglutarate,glutamate catabolic process to aspartate,glutamate metabolic process,lactation,oxaloacetate metabolic process,response to…	amino acid binding,carboxylic acid binding,enzyme binding,identical protein binding,kynurenine-oxoglutarate transaminase activity,L-aspartate:2-oxoglutarate aminotransferase activity,phospholipid binding,pyridoxal phosphate binding	8.88032e-17	43464.1	44897.9	42745.4	50965.7	47589.9	45932.6	49880	46661.6	45188.5	44549.8	46241.2	46504.2	0.987708	0.754609	-0.0178428	0.122278
P05213	Tuba1b	Mus musculus	Tubulin alpha-1B chain	cytoplasm,cytoplasmic microtubule,cytosol,membrane raft,microtubule,microtubule cytoskeleton,myelin sheath	cellular response to interleukin-4,microtubule-based process,microtubule cytoskeleton organization,mitotic cell cycle	double-stranded RNA binding,GTPase activity,GTP binding,structural constituent of cytoskeleton,ubiquitin protein ligase binding	2.03632e-15	NaN	NaN	NaN	NaN	NaN	#DIV/0!	NaN	NaN	NaN	NaN	NaN	#DIV/0!	#DIV/0!	#DIV/0!	#DIV/0!	#DIV/0!
P05214	Tuba3a	Mus musculus	Tubulin alpha-3 chain	ciliary basal body,cilium,cytoplasm,microtubule,microtubule cytoskeleton	microtubule-based process,microtubule cytoskeleton organization,mitotic cell cycle	GTPase activity,GTP binding,structural constituent of cytoskeleton	1.55872e-10	NaN	NaN	NaN	NaN	NaN	#DIV/0!	NaN	NaN	NaN	NaN	NaN	#DIV/0!	#DIV/0!	#DIV/0!	#DIV/0!	#DIV/0!
P05480	Src	Mus musculus	Neuronal proto-oncogene tyrosine-protein kinase Src	actin filament,caveola,cell junction,cytoplasm,cytoskeleton,cytosol,extrinsic component of cytoplasmic side of plasma membrane,focal adhesion,glutamatergic synapse,late endosome,lysosome,membrane,mitochondrial inner membrane,mitochondrion,neuron projection,nucleoplasm,nucleus,perinuclear region of cytoplasm,plasma membrane,podosome,postsynaptic density,postsynaptic specialization, intracellular c…	activation of protein kinase B activity,adherens junction organization,angiotensin-activated signaling pathway involved in heart process,bone resorption,branching involved in mammary gland duct morphogenesis,cell adhesion,cell-cell adhesion,cell cycle,cell differentiation,cell migration,cell proliferation,cellular response to fatty acid,cellular response to fluid shear stress,cellular response to…	ATP binding,BMP receptor binding,cell adhesion molecule binding,connexin binding,enzyme binding,ephrin receptor binding,estrogen receptor binding,growth factor receptor binding,heme binding,insulin receptor binding,integrin binding,ion channel binding,kinase activity,kinase binding,non-membrane spanning protein tyrosine kinase activity,phosphoprotein binding,macromolecular complex binding,protein…	2.69217e-11	666.006	737.306	673.538	692.751	727.012	699.322	770.098	637.423	767.581	756.852	738.886	734.168	0.952538	0.257419	-0.0701522	0.58936
P05532	Kit	Mus musculus	Mast/stem cell growth factor receptor Kit	acrosomal vesicle,cell-cell junction,cell surface,cytoplasm,cytoplasmic side of plasma membrane,external side of plasma membrane,extracellular space,fibrillar center,integral component of plasma membrane,mast cell granule,plasma membrane,receptor complex	actin cytoskeleton reorganization,activation of MAPK activity,B cell differentiation,cell chemotaxis,cell differentiation,cellular response to thyroid hormone stimulus,chemotaxis,cytokine-mediated signaling pathway,dendritic cell cytokine production,detection of mechanical stimulus involved in sensory perception of sound,developmental pigmentation,digestive tract development,ectopic germ cell pro…	ATP binding,cytokine binding,metal ion binding,protease binding,protein homodimerization activity,protein tyrosine kinase activity,SH2 domain binding,stem cell factor receptor activity,transmembrane receptor protein tyrosine kinase activity	4.15964e-07	51.9868	37.5985	55.1542	54.5469	52.7908	50.4154	51.2962	44.5014	57.1376	60.6439	64.2673	55.5693	0.907254	0.312159	-0.140422	0.505624
P05555	Itgam	Mus musculus	Integrin alpha-M	cell surface,external side of plasma membrane,extracellular space,integral component of membrane,integrin alphaM-beta2 complex,nucleus,plasma membrane,plasma membrane raft	activated T cell proliferation,beta-amyloid clearance,apoptotic signaling pathway,cell adhesion,cell-cell adhesion,cell surface receptor signaling pathway involved in cell-cell signaling,cellular extravasation,complement-mediated synapse pruning,forebrain development,integrin-mediated signaling pathway,leukocyte adhesion to vascular endothelial cell,leukocyte cell-cell adhesion,leukocyte migratio…	cargo receptor activity,complement component C3b binding,heat shock protein binding,heparan sulfate proteoglycan binding,heparin binding,metal ion binding,opsonin binding,macromolecular complex binding	1.00151e-22	129.95	175.935	143.537	142.692	155.408	149.504	162.249	134.996	148.582	148.17	151.051	149.01	1.00332	0.956916	0.00478048	0.0191261
P06151	Ldha	Mus musculus	L-lactate dehydrogenase A chain	cytosol,mitochondrion,sperm fibrous sheath	cellular response to extracellular stimulus,glucose catabolic process to lactate via pyruvate,lactate biosynthetic process from pyruvate	identical protein binding,lactate dehydrogenase activity,L-lactate dehydrogenase activity	1.52984e-14	33599.1	32626.8	33486.6	35364.9	34129.3	33841.3	34686.9	33569.5	31391.6	34151.5	33848.2	33529.5	1.0093	0.677788	0.0133546	0.168906
P06537	Nr3c1	Mus musculus	Glucocorticoid receptor	cytoplasm,cytosol,dendritic spine,glutamatergic synapse,membrane,microtubule organizing center,mitochondrion,neuron projection,nuclear speck,nucleoplasm,nucleus,postsynaptic density,postsynaptic density, intracellular component,macromolecular complex,spindle	adrenal gland development,cellular response to dexamethasone stimulus,cellular response to glucocorticoid stimulus,cellular response to steroid hormone stimulus,cellular response to transforming growth factor beta stimulus,chromatin-mediated maintenance of transcription,chromatin remodeling,glucocorticoid metabolic process,glucocorticoid receptor signaling pathway,mammary gland duct morphogenesis…	chromatin binding,core promoter sequence-specific DNA binding,DNA binding,transcriptional activator activity, RNA polymerase II transcription regulatory region sequence-specific binding,transcription factor activity, sequence-specific DNA binding,transcriptional repressor activity, RNA polymerase II transcription regulatory region sequence-specific binding,double-stranded DNA binding,glucocortico…	1.7979e-10	296.202	265.053	213.268	268.967	270.919	262.882	270.626	269.335	268.127	266.756	310.786	277.126	0.9486	0.398534	-0.0761285	0.399535
P06745	Gpi	Mus musculus	Glucose-6-phosphate isomerase	ciliary membrane,cytoplasm,cytosol,extracellular space,myelin sheath,neuron projection,nucleoplasm,plasma membrane	carbohydrate metabolic process,erythrocyte homeostasis,gluconeogenesis,glucose 6-phosphate metabolic process,glucose homeostasis,glycolytic process,glycolytic process through glucose-6-phosphate,in utero embryonic development,learning or memory,mesoderm formation,negative regulation of cysteine-type endopeptidase activity involved in apoptotic process,negative regulation of neuron apoptotic proce…	cytokine activity,glucose-6-phosphate isomerase activity,growth factor activity,monosaccharide binding,ubiquitin protein ligase binding	7.91096e-18	9273.16	9692.17	8748.83	8697.35	9478.88	9178.08	9226.42	9415.09	8903.73	9874.6	9275.03	9338.97	0.982771	0.542236	-0.0250722	0.265812
P06797	Ctsl	Mus musculus	Procathepsin L	apical plasma membrane,chromaffin granule,collagen-containing extracellular matrix,cytoplasm,cytoplasmic vesicle,external side of plasma membrane,extracellular space,lysosome,microvillus,neuron projection,nucleolus,nucleus,perikaryon,vacuole	antigen processing and presentation of peptide antigen,autophagic cell death,CD4-positive, alpha-beta T cell lineage commitment,cell communication,cellular response to starvation,collagen catabolic process,decidualization,elastin catabolic process,enkephalin processing,hair follicle morphogenesis,immune response,male gonad development,multicellular organism aging,negative regulation of keratinocy…	aminopeptidase activity,cysteine-type carboxypeptidase activity,cysteine-type endopeptidase activity,endopeptidase activity,histone binding,kininogen binding,peptide binding,macromolecular complex binding	2.4276e-09	562.409	429.638	470.389	534.299	555.777	510.502	623.125	557.342	435.858	426.456	431.427	494.842	1.03165	0.752387	0.0449503	0.123559
P06801	Me1	Mus musculus	NADP-dependent malic enzyme	cytosol,mitochondrion	malate metabolic process,pyruvate metabolic process,regulation of NADP metabolic process,response to hormone	identical protein binding,malate dehydrogenase (decarboxylating) (NAD+) activity,malate dehydrogenase (decarboxylating) (NADP+) activity,malic enzyme activity,manganese ion binding,NAD binding,NADP binding,oxaloacetate decarboxylase activity	9.18395e-16	1535.4	1299.17	1422.17	1395.44	1286.98	1387.83	1444.2	1633.92	1442.58	1522.48	1497.66	1508.17	0.920212	0.068767	-0.119962	1.16262
P06802	Enpp1	Mus musculus	Ectonucleotide pyrophosphatase/phosphodiesterase family member 1	apical dendrite,basilar dendrite,basolateral plasma membrane,cell body,cell projection,cell surface,extracellular space,integral component of membrane,integral component of plasma membrane,neuronal cell body,neuron projection,plasma membrane,synapse	3'-phosphoadenosine 5'-phosphosulfate metabolic process,ATP metabolic process,biomineral tissue development,bone remodeling,cellular phosphate ion homeostasis,cellular response to insulin stimulus,generation of precursor metabolites and energy,immune response,inorganic diphosphate transport,melanocyte differentiation,negative regulation of bone mineralization,negative regulation of cell growth,ne…	ATP binding,calcium ion binding,cyclic-GMP-AMP hydrolase activity,dTTP diphosphatase activity,exonuclease activity,identical protein binding,insulin receptor binding,NADH pyrophosphatase activity,nucleic acid binding,nucleoside-triphosphate diphosphatase activity,nucleotide diphosphatase activity,phosphodiesterase I activity,polysaccharide binding,protein homodimerization activity,scavenger recep…	0.000637607	NaN	NaN	NaN	41.4994	125.953	83.7264	NaN	NaN	NaN	NaN	NaN	#DIV/0!	#DIV/0!	#DIV/0!	#DIV/0!	#DIV/0!
P06837	Gap43	Mus musculus	Neuromodulin	axon,cell periphery,cytoplasm,dendrite,filopodium membrane,GABA-ergic synapse,growth cone membrane,perikaryon,plasma membrane,postsynaptic density	axon choice point recognition,axon guidance,axon regeneration,cell fate commitment,glial cell differentiation,nervous system development,regulation of filopodium assembly,regulation of growth,regulation of postsynaptic specialization assembly,tissue regeneration	calmodulin binding,lysophosphatidic acid binding,phosphatidylinositol phosphate binding,phosphatidylserine binding	1.78711e-13	3960.23	3720.19	3397.98	4007.2	4098.29	3836.78	4198.65	2946.35	3223.35	3395.51	3554.67	3463.7	1.10771	0.165823	0.147579	0.780354
P06909	Cfh	Mus musculus	Complement factor H	cytoplasm,extracellular region,extracellular space,mitochondrion,nucleus,plasma membrane	activation of membrane attack complex,angiogenesis,ATP metabolic process,complement activation,complement activation, alternative pathway,determination of adult lifespan,gene expression,glomerulus development,immune response,inflammatory response,kidney development,mitochondrial gene expression,neuromuscular process,organelle localization,photoreceptor cell differentiation,platelet aggregation,re…	complement component C3b binding,heparan sulfate proteoglycan binding,heparin binding,identical protein binding	3.5895e-05	117.209	130.76	153.029	89.0566	100.661	118.143	88.9943	116.323	125.948	100.417	99.1301	106.162	1.11286	0.385059	0.154266	0.414473
P07214	Sparc	Mus musculus	SPARC	basement membrane,cell surface,collagen-containing extracellular matrix,cytoplasm,extracellular matrix,extracellular space,glutamatergic synapse,intracellular membrane-bounded organelle,nuclear matrix,nucleus,platelet alpha granule,platelet alpha granule membrane,synapse,vesicle	anatomical structure development,bone development,cellular response to growth factor stimulus,heart development,inner ear development,lung development,negative regulation of angiogenesis,negative regulation of endothelial cell proliferation,ossification,pigmentation,positive regulation of endothelial cell migration,regulation of cell morphogenesis,regulation of cell proliferation,regulation of sy…	calcium ion binding,collagen binding,extracellular matrix binding	1.70874e-07	433.406	292.443	350.738	293.312	365.7	347.12	318.477	331.481	230.456	240.263	216.098	267.355	1.29835	0.0545726	0.376677	1.26303
P07309	Ttr	Mus musculus	Transthyretin	extracellular space,macromolecular complex	purine nucleobase metabolic process,retinol metabolic process,thyroid hormone transport	hormone activity,hormone binding,identical protein binding,macromolecular complex binding,thyroid hormone binding	2.04656e-08	632.863	423.747	531.304	476.558	711.013	555.097	634.275	549.65	358.208	355.188	398.313	459.127	1.20903	0.246646	0.273847	0.607926
P07310	Ckm	Mus musculus	Creatine kinase M-type	cytoplasm,extracellular space	phosphocreatine biosynthetic process,phosphocreatine metabolic process,response to heat	ATP binding,creatine kinase activity,kinase activity	7.00549e-05	19410.7	24026.5	25123.1	32199.6	22428.8	24637.7	21320.1	24360.4	25410.5	24760.3	19228.2	23015.9	1.07046	0.522778	0.0982374	0.281683
P07356	Anxa2	Mus musculus	Annexin A2	AnxA2-p11 complex,basement membrane,basolateral plasma membrane,cell cortex,cell surface,collagen-containing extracellular matrix,cytoplasm,cytosol,early endosome,endosome,extracellular exosome,extracellular space,extrinsic component of plasma membrane,late endosome membrane,lipid particle,lysosomal membrane,macropinosome,melanosome,membrane,membrane raft,midbody,myelin sheath adaxonal region,nuc…	angiogenesis,body fluid secretion,catabolism by host of symbiont protein,collagen fibril organization,fibrinolysis,membrane raft assembly,negative regulation by host of symbiont molecular function,negative regulation of development of symbiont involved in interaction with host,negative regulation of low-density lipoprotein particle receptor catabolic process,osteoclast development,positive regula…	bone sialoprotein binding,calcium channel activity,calcium-dependent phospholipid binding,calcium-dependent protein binding,calcium ion binding,cytoskeletal protein binding,identical protein binding,phosphatidylinositol-4,5-bisphosphate binding,phosphatidylserine binding,phospholipase A2 inhibitor activity,protease binding,Rab GTPase binding,S100 protein binding,serine-type endopeptidase inhibito…	1.2683e-16	975.228	1171.45	1354.75	1332.92	1072.02	1181.27	1166.96	1292.01	1038.32	975.78	821.885	1058.99	1.11547	0.293969	0.157655	0.531699
P07724	Alb	Mus musculus	Albumin	basement membrane,cytoplasm,endoplasmic reticulum,extracellular exosome,extracellular region,extracellular space,Golgi apparatus,myelin sheath,macromolecular complex	cellular response to starvation,maintenance of mitochondrion location,negative regulation of apoptotic process,positive regulation of circadian sleep/wake cycle, non-REM sleep	chaperone binding,DNA binding,drug binding,enterobactin binding,enzyme binding,exogenous protein binding,fatty acid binding,identical protein binding,oxygen binding,pyridoxal phosphate binding,toxic substance binding,zinc ion binding	1.89961e-12	9490.97	4273.26	4044.16	5723.83	5335.91	5773.63	5429.19	6371.83	3650.69	3345.63	4463.75	4652.22	1.24105	0.350277	0.311558	0.455588
P07744	Krt4	Mus musculus	Keratin, type II cytoskeletal 4	cell surface,intermediate filament cytoskeleton,keratin filament	cytoskeleton organization,epithelial cell differentiation,negative regulation of epithelial cell proliferation		0.000452448	300.362	397.435	456.941	218.68	NaN	343.354	NaN	NaN	285.328	NaN	NaN	285.328	1.20337	#DIV/0!	0.267078	#DIV/0!
P07758;Q00896	Serpina1a;Serpina1c	Mus musculus	Alpha-1-antitrypsin 1-1;Alpha-1-antitrypsin 1-3	collagen-containing extracellular matrix,endoplasmic reticulum,extracellular region,extracellular space,Golgi apparatus,intracellular membrane-bounded organelle;endoplasmic reticulum,extracellular region,extracellular space,Golgi apparatus,intracellular membrane-bounded organelle	acute-phase response,negative regulation of endopeptidase activity,protein N-linked glycosylation,response to cytokine,response to peptide hormone;negative regulation of endopeptidase activity,response to cytokine,response to peptide hormone	endopeptidase inhibitor activity,identical protein binding,protease binding,serine-type endopeptidase inhibitor activity;endopeptidase inhibitor activity,identical protein binding,protease binding,serine-type endopeptidase inhibitor activity	7.46706e-15	644.829	382.522	536.478	324.011	432.497	464.067	549.742	433.009	278.937	289.22	278.117	365.805	1.26862	0.248442	0.343259	0.604775
P07759	Serpina3k	Mus musculus	Serine protease inhibitor A3K	collagen-containing extracellular matrix,extracellular space	negative regulation of endopeptidase activity,response to cytokine,response to peptide hormone	serine-type endopeptidase inhibitor activity	3.87026e-18	200.972	104.271	139.874	98.4685	136.727	136.063	117.86	116.963	97.2821	78.3576	92.1169	100.516	1.35364	0.10947	0.436846	0.960706
P07901	Hsp90aa1	Mus musculus	Heat shock protein HSP 90-alpha	apical plasma membrane,axonal growth cone,basolateral plasma membrane,brush border membrane,cell surface,collagen-containing extracellular matrix,cytoplasm,cytosol,dendritic growth cone,melanosome,mitochondrion,myelin sheath,neuronal cell body,neuron projection,nucleus,perinuclear region of cytoplasm,plasma membrane,macromolecular complex,sperm flagellum,sperm mitochondrial sheath,sperm plasma me…	axon extension,cardiac muscle cell apoptotic process,cellular response to heat,central nervous system neuron axonogenesis,chaperone-mediated protein complex assembly,establishment of cell polarity,neuron migration,nitric oxide biosynthetic process,positive regulation of cardiac muscle contraction,positive regulation of cell size,positive regulation of cellular protein catabolic process,positive r…	ATPase activity,ATP binding,CTP binding,dATP binding,disordered domain specific binding,DNA polymerase binding,GTPase binding,GTP binding,histone deacetylase binding,identical protein binding,ion channel binding,mRNA binding,nitric-oxide synthase regulator activity,protein binding involved in protein folding,protein homodimerization activity,protein phosphatase binding,protein tyrosine kinase bin…	1.35609e-16	13438.9	13416.5	13910.9	13532.2	13530.2	13565.7	13619.8	11986.1	12054.8	12855.8	12706.5	12644.6	1.07285	0.0182315	0.101444	1.73918
P07934	Phkg1	Mus musculus	Phosphorylase b kinase gamma catalytic chain, skeletal muscle/heart isoform	phosphorylase kinase complex	glycogen biosynthetic process,glycogen metabolic process,protein phosphorylation	ATP binding,calmodulin binding,enzyme binding,phosphorylase kinase activity,tau-protein kinase activity	0.000220349	279.175	109.016	251.586	144.422	158.27	188.494	NaN	188.764	166.172	169.309	198.799	180.761	1.04278	0.84332	0.0604346	0.0740077
P08003	Pdia4	Mus musculus	Protein disulfide-isomerase A4	cell surface,endoplasmic reticulum,endoplasmic reticulum chaperone complex,endoplasmic reticulum lumen,extracellular space,melanosome,smooth endoplasmic reticulum	cell redox homeostasis,chaperone-mediated protein folding,positive regulation of protein folding,protein folding,response to endoplasmic reticulum stress	peptide disulfide oxidoreductase activity,protein disulfide isomerase activity	1.06142e-16	962.226	880.37	1008.46	949.633	880.42	936.221	964.988	854.487	931.243	926.384	848.426	905.105	1.03438	0.383741	0.0487637	0.415962
P08030	Aprt	Mus musculus	Adenine phosphoribosyltransferase	cytoplasm,cytosol,nucleoplasm	adenine metabolic process,adenine salvage,AMP salvage,cellular response to insulin stimulus,grooming behavior,lactation,purine ribonucleoside salvage	adenine binding,adenine phosphoribosyltransferase activity,AMP binding	7.58138e-12	698.638	541.192	622.184	688.746	551.445	620.441	680.666	654.003	604.616	504.492	523.432	593.442	1.0455	0.589032	0.0641873	0.229861
P08074	Cbr2	Mus musculus	Carbonyl reductase [NADPH] 2	mitochondrial matrix,mitochondrion	glucose metabolic process,NADH oxidation,xylulose metabolic process	carbonyl reductase (NADPH) activity,identical protein binding,L-xylulose reductase (NADP+) activity,protein self-association	0.000159684	NaN	NaN	117.879	105.068	87.897	103.615	44.596	139.202	NaN	NaN	111.913	98.5703	1.05118	0.872204	0.0720043	0.059382
P08103	Hck	Mus musculus	Tyrosine-protein kinase HCK	caveola,cell projection,cytoskeleton,cytosol,extrinsic component of cytoplasmic side of plasma membrane,focal adhesion,Golgi apparatus,lysosome,nucleoplasm,plasma membrane,transport vesicle	cell differentiation,defense response to Gram-positive bacterium,exocytosis,inflammatory response,innate immune response,negative regulation of apoptotic process,peptidyl-tyrosine autophosphorylation,peptidyl-tyrosine phosphorylation,phagocytosis,positive regulation of actin cytoskeleton reorganization,positive regulation of cell proliferation,protein autophosphorylation,regulation of cell prolif…	ATP binding,non-membrane spanning protein tyrosine kinase activity,phosphotyrosine binding,protein tyrosine kinase activity,receptor binding	0.000100259	1066.52	904.256	1047.61	925.054	992.772	987.242	960.282	1015.35	1211.48	1054.82	1151.74	1078.74	0.915184	0.139739	-0.127866	0.854681
P08113	Hsp90b1	Mus musculus	Endoplasmin	cytosol,endoplasmic reticulum,endoplasmic reticulum chaperone complex,endoplasmic reticulum lumen,endoplasmic reticulum membrane,extracellular region,melanosome,midbody,perinuclear region of cytoplasm,plasma membrane,macromolecular complex,sarcoplasmic reticulum lumen,smooth endoplasmic reticulum	actin rod assembly,cellular response to ATP,negative regulation of apoptotic process,protein folding,regulation of phosphoprotein phosphatase activity,response to hypoxia,retrograde protein transport, ER to cytosol,ER-associated ubiquitin-dependent protein catabolic process	ATP binding,low-density lipoprotein particle receptor binding,protein phosphatase binding,RNA binding,unfolded protein binding	5.59495e-15	6692.7	7133.32	7262.12	7048.12	6921.24	7011.5	6610.89	6377.26	6578.98	6981.18	6820.76	6673.81	1.0506	0.0451865	0.0712115	1.34499
P08122	Col4a2	Mus musculus	Collagen alpha-2(IV) chain	basement membrane,collagen-containing extracellular matrix,collagen type IV trimer,extracellular matrix,extracellular region,extracellular space	aging,angiogenesis,cellular response to transforming growth factor beta stimulus,collagen-activated tyrosine kinase receptor signaling pathway,endodermal cell differentiation,extracellular matrix organization,negative regulation of angiogenesis,response to activity,transcription, DNA-templated	extracellular matrix structural constituent	1.01936e-13	6860.24	5704.09	8540.86	7636.17	5283.06	6804.88	6960.11	9311.87	9134.75	17325.7	11665.9	10879.7	0.625468	0.0614465	-0.676991	1.2115
P08207	S100a10	Mus musculus	Protein S100-A10	AnxA2-p11 complex,collagen-containing extracellular matrix,endoplasmic reticulum,extrinsic component of plasma membrane,membrane raft	membrane raft assembly,positive regulation of binding,positive regulation of focal adhesion assembly,positive regulation of GTPase activity,positive regulation of stress fiber assembly,positive regulation of substrate adhesion-dependent cell spreading,protein localization to plasma membrane,response to drug,membrane budding	calcium ion binding,ion channel binding,protein homodimerization activity	7.40593e-05	85.8677	31.4018	30.1037	68.3992	60.8206	55.3186	NaN	86.5513	42.1756	52.9251	NaN	60.5507	0.913592	0.774058	-0.130378	0.111226
P08226	Apoe	Mus musculus	Apolipoprotein E	cell surface,chylomicron,cytoplasm,cytosol,dendrite,discoidal high-density lipoprotein particle,endoplasmic reticulum,endosome,extracellular matrix,extracellular region,extracellular space,extrinsic component of external side of plasma membrane,glutamatergic synapse,Golgi apparatus,high-density lipoprotein particle,intermediate-density lipoprotein particle,late endosome,lipoprotein particle,low-d…	aging,AMPA glutamate receptor clustering,amyloid precursor protein metabolic process,artery morphogenesis,cardiovascular system development,cellular calcium ion homeostasis,cGMP-mediated signaling,cholesterol catabolic process,cholesterol efflux,cholesterol homeostasis,cholesterol metabolic process,chylomicron remnant clearance,fatty acid homeostasis,G-protein coupled receptor signaling pathway,h…	beta-amyloid binding,antioxidant activity,cholesterol transfer activity,heparan sulfate proteoglycan binding,heparin binding,hydroxyapatite binding,identical protein binding,lipid binding,lipid transporter activity,lipoprotein particle binding,low-density lipoprotein particle receptor binding,metal chelating activity,phosphatidylcholine-sterol O-acyltransferase activator activity,phospholipid bin…	1.12852e-16	3365.74	3565.94	3483.36	3629.61	3741.78	3557.29	3508.87	3315.31	3349.52	3230.55	2978.77	3276.6	1.08566	0.0316189	0.118576	1.50005
P08228	Sod1	Mus musculus	Superoxide dismutase [Cu-Zn]	axon cytoplasm,cytoplasm,cytoplasmic vesicle,cytosol,dendrite cytoplasm,dense core granule,extracellular region,extracellular space,lysosome,mitochondrial intermembrane space,mitochondrion,myelin sheath,neuronal cell body,neuron projection,nucleoplasm,nucleus,peroxisome,plasma membrane,macromolecular complex,secretory granule	activation of MAPK activity,aging,anterograde axonal transport,auditory receptor cell stereocilium organization,cell aging,cellular iron ion homeostasis,cellular response to ATP,cellular response to cadmium ion,cellular response to potassium ion,embryo implantation,glutathione metabolic process,heart contraction,hydrogen peroxide biosynthetic process,locomotory behavior,muscle cell cellular homeo…	chaperone binding,copper ion binding,enzyme binding,identical protein binding,protein phosphatase 2B binding,Rac GTPase binding,superoxide dismutase activity,zinc ion binding	1.4453e-17	49853.6	46510.6	43788.5	51060.1	50936.5	48429.9	52343.4	49395.6	44998.9	43110.5	43118.7	46593.4	1.03941	0.452381	0.0557711	0.344496
P08249	Mdh2	Mus musculus	Malate dehydrogenase, mitochondrial	cytoplasm,membrane,mitochondrial inner membrane,mitochondrial matrix,mitochondrion,myelin sheath	aerobic respiration,carbohydrate metabolic process,malate metabolic process,NADH metabolic process,oxaloacetate metabolic process,tricarboxylic acid cycle	L-malate dehydrogenase activity,malate dehydrogenase (NADP+) activity,malate dehydrogenase activity,protein homodimerization activity,protein self-association	1.13698e-13	43100.3	39572.8	40686.1	44357.1	37738.4	41090.9	40219.1	43124.2	45827.8	47945.2	43983	44219.9	0.929241	0.113795	-0.105875	0.943878
P08414	Camk4	Mus musculus	Calcium/calmodulin-dependent protein kinase type IV	cytoplasm,cytosol,fibrillar center,GABA-ergic synapse,glutamatergic synapse,nucleoplasm,nucleus,postsynapse	adaptive immune response,inflammatory response,intracellular signal transduction,long-term memory,myeloid dendritic cell differentiation,neuron-neuron synaptic transmission,nucleocytoplasmic transport,peptidyl-serine phosphorylation,positive regulation of protein export from nucleus,positive regulation of transcription, DNA-templated,postsynapse to nucleus signaling pathway,protein autophosphoryl…	ATP binding,calcium-dependent protein serine/threonine kinase activity,calmodulin binding,calmodulin-dependent protein kinase activity	8.43457e-16	4588.2	3685.93	4171.78	3815.16	3792.04	4010.62	3638.58	4085.02	4306.34	3938.7	4329.38	4059.61	0.987934	0.820943	-0.0175131	0.085687
P08551	Nefl	Mus musculus	Neurofilament light polypeptide	axon,axon cytoplasm,cytoplasm,growth cone,intermediate filament,myelin sheath,neurofilament,neuromuscular junction,neuron projection,presynaptic intermediate filament cytoskeleton,Schaffer collateral - CA1 synapse	anterograde axonal transport,axonal transport of mitochondrion,cerebral cortex development,hippocampus development,intermediate filament bundle assembly,intermediate filament organization,intermediate filament polymerization or depolymerization,locomotion,microtubule cytoskeleton organization,negative regulation of neuron apoptotic process,neurofilament bundle assembly,neurofilament cytoskeleton …	identical protein binding,phospholipase binding,macromolecular complex binding,protein C-terminus binding,protein domain specific binding,protein binding, bridging,structural constituent of cytoskeleton,structural constituent of postsynaptic intermediate filament cytoskeleton	3.58918e-16	5916.54	6223.21	7962.87	9385.55	8867.68	7671.17	7183.07	8875.63	8582.35	6180.92	6746.2	7513.64	1.02097	0.860654	0.0299351	0.0651715
P08553	Nefm	Mus musculus	Neurofilament medium polypeptide	axon,cytoskeleton,intermediate filament,myelin sheath,neurofilament,neuromuscular junction,neuron projection,perikaryon,postsynaptic density,presynaptic intermediate filament cytoskeleton	axo-dendritic transport,intermediate filament bundle assembly,intermediate filament cytoskeleton organization,intermediate filament polymerization or depolymerization,microtubule cytoskeleton organization,neurofilament bundle assembly,neurofilament cytoskeleton organization,regulation of axon diameter	macromolecular complex binding,receptor binding,structural molecule activity,toxic substance binding	1.46649e-16	22830	25027.2	31754.2	36496.8	38073.2	30836.3	28098.7	32999.6	37080	25577.7	24598.5	29670.9	1.03928	0.768929	0.0555802	0.114114
P08556	Nras	Mus musculus	GTPase NRas	Golgi apparatus,Golgi membrane,membrane,plasma membrane	defense response to protozoan,negative regulation of skeletal muscle tissue development,positive regulation of angiogenesis,positive regulation of endothelial cell proliferation,positive regulation of fibroblast proliferation,positive regulation of interferon-gamma production,Ras protein signal transduction,regulation of cell cycle,regulation of gene expression,regulation of protein phosphorylati…	GDP binding,GTPase activity,GTP binding,macromolecular complex binding	2.21631e-11	559.149	437.118	465.793	278.523	431.263	434.369	341.414	427.532	423.931	380.239	304.608	375.545	1.15664	0.282485	0.209937	0.549004
P08752	Gnai2	Mus musculus	Guanine nucleotide-binding protein G(i) subunit alpha-2	cell body,centrosome,cytoplasm,cytosol,dendrite,heterotrimeric G-protein complex,membrane,membrane raft,midbody,nucleoplasm,nucleus,plasma membrane,synapse	adenylate cyclase-activating G-protein coupled receptor signaling pathway,adenylate cyclase-inhibiting G-protein coupled receptor signaling pathway,adenylate cyclase-modulating G-protein coupled receptor signaling pathway,cell cycle,cell division,cell proliferation,gamma-aminobutyric acid signaling pathway,G-protein coupled acetylcholine receptor signaling pathway,adenosine receptor signaling pat…	G-protein beta/gamma-subunit complex binding,G-protein coupled receptor binding,GTPase activity,GTP binding,metal ion binding	2.49909e-14	6053.68	6379.08	5905.11	5833.83	6094.94	6053.33	5847.09	6018.24	5647.22	6538	6212.93	6052.7	1.0001	0.997296	0.000149872	0.0011758
P08775	Polr2a	Mus musculus	DNA-directed RNA polymerase II subunit RPB1	cytoplasm,nuclear euchromatin,nucleoplasm,nucleus,DNA-directed RNA polymerase II, core complex	cellular response to oxygen levels,DNA-templated transcription, termination,positive regulation of RNA splicing,response to organic cyclic compound,transcription from RNA polymerase II promoter	core promoter sequence-specific DNA binding,DNA binding,DNA-directed RNA polymerase activity,kinase binding,metal ion binding,promoter-specific chromatin binding,protein C-terminus binding,ubiquitin protein ligase binding	8.71985e-07	176.564	177.284	129.487	153.429	140.344	155.422	152.763	98.3999	100.652	141.308	126.12	123.848	1.25493	0.0600106	0.327611	1.22177
P09055	Itgb1	Mus musculus	Integrin beta-1	acrosomal vesicle,adherens junction,basement membrane,cell-cell junction,cell surface,cytoplasm,dendritic spine,external side of plasma membrane,filopodium,focal adhesion,glial cell projection,glutamatergic synapse,hemidesmosome,integral component of postsynaptic membrane,integral component of synaptic membrane,integrin alpha10-beta1 complex,integrin alpha11-beta1 complex,integrin alpha1-beta1 co…	axon extension,basement membrane organization,bicellular tight junction assembly,calcium-independent cell-matrix adhesion,cardiac muscle cell differentiation,cardiac muscle tissue development,CD40 signaling pathway,cell adhesion,cell adhesion mediated by integrin,cell-cell adhesion mediated by integrin,cell fate specification,cell-matrix adhesion,cell migration,cell migration involved in sproutin…	actin binding,alpha-actinin binding,cell adhesion molecule binding,collagen binding,collagen binding involved in cell-matrix adhesion,C-X3-C chemokine binding,fibronectin binding,integrin binding,kinase binding,laminin binding,metal ion binding,protease binding,macromolecular complex binding,protein domain specific binding,protein heterodimerization activity,protein kinase binding,protein tyrosin…	2.56158e-11	368.098	484.715	373.202	340.538	329.8	379.271	358.986	424.976	433.457	671.094	511.854	480.073	0.790026	0.132842	-0.340027	0.876665
P09103	P4hb	Mus musculus	Protein disulfide-isomerase	cytoskeleton,cytosol,endoplasmic reticulum,endoplasmic reticulum chaperone complex,endoplasmic reticulum-Golgi intermediate compartment,endoplasmic reticulum lumen,external side of plasma membrane,lamellipodium,melanosome,procollagen-proline 4-dioxygenase complex,macromolecular complex	cell redox homeostasis,cellular response to hypoxia,cellular response to interleukin-7,peptidyl-proline hydroxylation to 4-hydroxy-L-proline,positive regulation of cell adhesion,positive regulation of substrate adhesion-dependent cell spreading,positive regulation of viral entry into host cell,protein folding,regulation of oxidative stress-induced intrinsic apoptotic signaling pathway,response to…	actin binding,enzyme binding,integrin binding,peptide disulfide oxidoreductase activity,procollagen-proline 4-dioxygenase activity,macromolecular complex binding,protein disulfide isomerase activity,protein heterodimerization activity	4.04877e-12	5400.7	4900.05	5559.3	6065.51	5406.49	5466.41	5471.04	5546.56	4842.83	5356.68	5059.13	5255.25	1.04018	0.382938	0.056835	0.416871
P09240	Cck	Mus musculus	Cholecystokinin	axon,axon hillock,axon initial segment,dendrite,extracellular space,neuronal cell body,perikaryon,terminal bouton	activation of cysteine-type endopeptidase activity involved in apoptotic process,apoptotic process,axonogenesis,digestion,eating behavior,memory,negative regulation of appetite,negative regulation of behavioral fear response,negative regulation of eating behavior,neuron migration,positive regulation of apoptotic process,positive regulation of behavioral fear response,positive regulation of cell p…	hormone activity,neuropeptide hormone activity,peptide hormone receptor binding	1.46972e-09	1624.31	1163.13	1635.68	1168.23	1368.18	1391.91	1077.58	1349.54	1075.62	1301.49	1139.29	1188.7	1.17094	0.125704	0.227672	0.900652
P09242	Alpl	Mus musculus	Alkaline phosphatase, tissue-nonspecific isozyme	anchored component of membrane,extracellular matrix,extracellular membrane-bounded organelle,extracellular space,plasma membrane	cellular response to organic cyclic compound,cementum mineralization,dephosphorylation,developmental process involved in reproduction,endochondral ossification,response to antibiotic,response to glucocorticoid,response to lipopolysaccharide,response to vitamin D	alkaline phosphatase activity,metal ion binding,pyrophosphatase activity	2.30641e-09	443.532	144.022	266.499	144.672	143.352	228.416	137.635	235.207	447.708	548.47	555.42	384.888	0.59346	0.167423	-0.752777	0.776186
P09405	Ncl	Mus musculus	Nucleolin	cell cortex,cell surface,cytoplasm,cytoplasmic ribonucleoprotein granule,dense fibrillar component,fibrillar center,nucleolus,nucleoplasm,nucleus,ribonucleoprotein complex,spliceosomal complex	angiogenesis,cellular response to epidermal growth factor stimulus,cellular response to leukemia inhibitory factor,cellular response to lipopolysaccharide,endocytosis,negative regulation of apoptotic process,negative regulation of translation,positive regulation of interleukin-6 production,positive regulation of mRNA splicing, via spliceosome,positive regulation of transcription from RNA polymera…	calcium ion binding,DNA topoisomerase binding,ErbB-4 class receptor binding,histone binding,identical protein binding,laminin binding,mRNA 5'-UTR binding,protein C-terminus binding,RNA binding,rRNA primary transcript binding,selenocysteine insertion sequence binding,sequence-specific DNA binding,receptor binding,single-stranded DNA binding,telomeric DNA binding	6.35475e-16	4258.17	4537.22	4730.42	4900.13	4568.58	4598.9	4594.33	4450.57	4734.72	5184.86	4618.42	4716.58	0.975051	0.495739	-0.036451	0.304747
P09411	Pgk1	Mus musculus	Phosphoglycerate kinase 1	cytoplasm,cytosol,extracellular space,membrane raft	carbohydrate metabolic process,cellular response to hypoxia,epithelial cell differentiation,gluconeogenesis,glycolytic process,negative regulation of angiogenesis,phosphorylation,plasminogen activation,positive regulation of oxidative phosphorylation	ADP binding,ATP binding,phosphoglycerate kinase activity,protein-disulfide reductase activity	1.13812e-16	16551.1	15693.7	17405.5	18273.9	15944.3	16773.7	17007.5	18009.5	15924.5	15616.4	15575	16426.6	1.02113	0.619427	0.030168	0.20801
P09470	Ace	Mus musculus	Angiotensin-converting enzyme	basal plasma membrane,brush border membrane,cytoplasm,endosome,external side of plasma membrane,extracellular exosome,extracellular space,integral component of membrane,lysosome,plasma membrane,sperm midpiece,vesicle	beta-amyloid metabolic process,angiogenesis involved in coronary vascular morphogenesis,animal organ regeneration,arachidonic acid secretion,bradykinin catabolic process,cell proliferation in bone marrow,eating behavior,embryo development ending in birth or egg hatching,heart contraction,hormone catabolic process,kidney development,lung alveolus development,negative regulation of blood vessel dia…	actin binding,bradykinin receptor binding,carboxypeptidase activity,chloride ion binding,drug binding,endopeptidase activity,exopeptidase activity,metallodipeptidase activity,metallopeptidase activity,mitogen-activated protein kinase binding,mitogen-activated protein kinase kinase binding,peptidase activity,peptidyl-dipeptidase activity,tripeptidyl-peptidase activity,zinc ion binding	4.44099e-07	298.766	239.654	292.505	129.892	257.246	243.612	205.671	173.752	253.875	171.08	147.063	190.288	1.28023	0.172617	0.356401	0.762915
P09528	Fth1	Mus musculus	Ferritin heavy chain	autolysosome,cytoplasm,endocytic vesicle lumen,extracellular region,mitochondrion	immune response,intracellular sequestering of iron ion,iron ion transport,negative regulation of cell proliferation,negative regulation of fibroblast proliferation	ferric iron binding,ferrous iron binding,ferroxidase activity,iron ion binding	7.12481e-12	6851.41	5109.34	5285.75	5973.86	5583.24	5760.72	6599.53	6850.7	4782.54	4758.12	4985.56	5595.29	1.02957	0.774548	0.0420354	0.110952
P09541	Myl4	Mus musculus	Myosin light chain 4	A band,myosin complex	cardiac muscle contraction,positive regulation of ATPase activity,regulation of the force of heart contraction	actin filament binding,actin monomer binding,calcium ion binding	1.05663e-10	327.538	207.901	333.819	251.263	271.746	278.454	238.52	313.61	221.837	188.287	231.861	238.823	1.16594	0.242471	0.221496	0.615341
P09671	Sod2	Mus musculus	Superoxide dismutase [Mn], mitochondrial	cytoplasm,mitochondrial inner membrane,mitochondrial matrix,mitochondrial nucleoid,mitochondrion,myelin sheath	vasodilation by acetylcholine involved in regulation of systemic arterial blood pressure,age-dependent response to oxidative stress,age-dependent response to reactive oxygen species,apoptotic mitochondrial changes,cellular response to ethanol,detection of oxygen,erythrophore differentiation,glutathione metabolic process,heart development,hemopoiesis,hydrogen peroxide biosynthetic process,hydrogen…	DNA binding,enzyme binding,identical protein binding,manganese ion binding,metal ion binding,oxidoreductase activity,oxygen binding,superoxide dismutase activity	9.31036e-12	4622.4	3767.52	4202.33	4765.82	4398.28	4351.27	4582.31	4796.63	4303.34	4306.83	4273.83	4452.59	0.977245	0.630534	-0.0332071	0.200291
P09813	Apoa2	Mus musculus	Apolipoprotein A-II	chylomicron,cytosol,extracellular region,extracellular space,high-density lipoprotein particle,spherical high-density lipoprotein particle,very-low-density lipoprotein particle	animal organ regeneration,cholesterol efflux,cholesterol homeostasis,cholesterol metabolic process,cholesterol transport,diacylglycerol catabolic process,high-density lipoprotein particle assembly,high-density lipoprotein particle clearance,high-density lipoprotein particle remodeling,lipid transport,lipoprotein metabolic process,low-density lipoprotein particle remodeling,negative regulation of …	apolipoprotein receptor binding,cholesterol binding,cholesterol transfer activity,heat shock protein binding,high-density lipoprotein particle binding,high-density lipoprotein particle receptor binding,lipase inhibitor activity,lipid binding,lipid transporter activity,phosphatidylcholine binding,phosphatidylcholine-sterol O-acyltransferase activator activity,phospholipid binding,protein heterodim…	4.06456e-07	203.304	34.1269	34.0062	73.492	58.3213	80.6501	40.2629	71.2595	27.5353	NaN	29.8262	42.2209	1.91019	0.331975	0.933716	0.478895
P09925	Surf1	Mus musculus	Surfeit locus protein 1	integral component of membrane,mitochondrial membrane,mitochondrion	mitochondrial respiratory chain complex IV assembly,oxidative phosphorylation	cytochrome-c oxidase activity	1.7344e-12	605.771	507.157	571.033	508.141	572.77	552.975	509.5	535.355	431.544	439.548	488.371	480.864	1.14996	0.0325151	0.201585	1.48792
P0C027;P0C028	Nudt10;Nudt11	Mus musculus	Diphosphoinositol polyphosphate phosphohydrolase 3-alpha;Diphosphoinositol polyphosphate phosphohydrolase 3-beta	cytoplasm,cytosol,nucleus;cytoplasm,cytosol,nucleus	adenosine 5'-(hexahydrogen pentaphosphate) catabolic process,diadenosine hexaphosphate catabolic process,diadenosine pentaphosphate catabolic process,diphosphoinositol polyphosphate metabolic process;adenosine 5'-(hexahydrogen pentaphosphate) catabolic process,diadenosine hexaphosphate catabolic process,diadenosine pentaphosphate catabolic process,diphosphoinositol polyphosphate metabolic process	bis(5'-adenosyl)-hexaphosphatase activity,bis(5'-adenosyl)-pentaphosphatase activity,diphosphoinositol-polyphosphate diphosphatase activity,endopolyphosphatase activity,inositol diphosphate pentakisphosphate diphosphatase activity,inositol diphosphate tetrakisphosphate diphosphatase activity,m7G(5')pppN diphosphatase activity,metal ion binding;bis(5'-adenosyl)-hexaphosphatase activity,bis(5'-aden…	3.25882e-12	932.759	820.489	904.582	911.121	974.766	908.743	970.223	914.018	725.654	817.723	767.421	839.008	1.08312	0.216488	0.115189	0.664566
P0C0A3	Chmp6	Mus musculus	Charged multivesicular body protein 6	endosome membrane,ESCRT III complex,late endosome membrane,multivesicular body	late endosome to vacuole transport via multivesicular body sorting pathway,midbody abscission,mitotic metaphase plate congression,negative regulation of epidermal growth factor-activated receptor activity,nucleus organization,protein transport,regulation of protein catabolic process,membrane budding,viral budding via host ESCRT complex	macromolecular complex binding,protein N-terminus binding	3.77508e-17	377.435	281.082	347.943	268.322	304.591	315.874	257.636	257.985	458.162	382.185	367.422	344.678	0.916434	0.528953	-0.125897	0.276583
P0C0S6;Q3THW5	H2az1;H2az2	Mus musculus	Histone H2A.Z;Histone H2A.V	nuclear chromatin,nuclear euchromatin,nuclear heterochromatin,nucleosome,nucleus;nuclear chromatin,nucleosome,nucleus	cellular response to estradiol stimulus,cellular response to insulin stimulus,chromatin organization,chromatin silencing,multicellular organism development,positive regulation of transcription from RNA polymerase II promoter;chromatin organization,chromatin silencing	chromatin DNA binding,DNA binding,nucleosomal DNA binding,protein heterodimerization activity,RNA polymerase II core promoter proximal region sequence-specific DNA binding,RNA polymerase II core promoter sequence-specific DNA binding;DNA binding,protein heterodimerization activity	7.32576e-16	1309.63	1436.97	1619.88	1465.71	1515.37	1469.51	1352.81	1646.74	1352.89	1339.42	1301.7	1398.71	1.05062	0.405468	0.0712363	0.392043
P0C192	Lrrc4b	Mus musculus	Leucine-rich repeat-containing protein 4B	cerebellar mossy fiber,glutamatergic synapse,integral component of postsynaptic density membrane,presynaptic membrane	positive regulation of synapse assembly,regulation of postsynaptic density assembly,regulation of presynapse assembly,synaptic membrane adhesion	receptor binding	5.32399e-17	463.075	464.15	464.248	340.513	444.735	435.344	435.527	378.356	444.056	529.865	467.561	451.073	0.96513	0.65904	-0.051205	0.181088
P0C6F1	Dnah2	Mus musculus	Dynein heavy chain 2, axonemal	axoneme,dynein complex,inner dynein arm,microtubule,motile cilium,sperm flagellum	microtubule-based movement	ATP binding,ATP-dependent microtubule motor activity, minus-end-directed,dynein intermediate chain binding,dynein light intermediate chain binding	4.32018e-06	761.59	457.333	687.672	424.702	562.288	578.717	525.657	497.692	548.086	430.839	436.801	487.815	1.18635	0.223798	0.246524	0.650145
P0C7L0	Wipf3	Mus musculus	WAS/WASL-interacting protein family member 3	actin filament,cytoplasm	actin filament-based movement,cell differentiation,multicellular organism development,spermatogenesis	actin binding,SH3 domain binding	4.76694e-10	1467.02	1380	1381.71	1384.65	1253.41	1373.36	1302.03	1305.67	1290.52	1299.82	1310.56	1301.72	1.05503	0.0706323	0.0772884	1.151
P0C7M9	Clec2l	Mus musculus	C-type lectin domain family 2 member L	integral component of membrane		carbohydrate binding	6.5933e-05	92.2459	89.5707	89.7192	83.8536	65.7523	84.2284	60.4368	136.252	117.566	80.769	96.6948	98.3436	0.85647	0.348566	-0.223526	0.457715
P0C7N9	Psmg4	Mus musculus	Proteasome assembly chaperone 4	macromolecular complex	proteasome assembly	macromolecular complex binding	0.000194002	130.69	144.484	171.103	253.696	172.846	174.564	197.746	198.158	97.8465	67.8728	104.876	133.3	1.30956	0.265982	0.389081	0.575148
P0C8B4	Gon7	Mus musculus	EKC/KEOPS complex subunit GON7	cytosol,EKC/KEOPS complex,nucleolus,nucleoplasm,nucleus			2.39339e-08	427.048	266.941	276.493	261.81	265.324	299.523	282.206	305.424	282.892	195.916	228.05	258.898	1.15692	0.314397	0.210286	0.502522
P0C8K7	Smim1	Mus musculus	Small integral membrane protein 1	cell surface,integral component of membrane,plasma membrane		protein homodimerization activity	7.81076e-11	104.956	121.699	92.6211	59.8148	52.1314	86.2445	28.986	88.5761	103.456	92.6267	69.5314	76.6352	1.12539	0.620122	0.170424	0.207523
P0C913		Mus musculus	Overexpressed in colon carcinoma 1 protein homolog				7.2491e-07	621.921	299.601	373.103	228.333	300.134	364.618	228.787	482.811	346.194	479.059	436.9	394.75	0.923668	0.727854	-0.114553	0.137955
P0CG14	Derpc	Mus musculus	Decreased expression in renal and prostate cancer protein	nucleoplasm			0.000219745	105.674	181.627	184.593	306.049	206.838	196.956	238.347	283.703	178.902	351.241	NaN	263.048	0.748745	0.215319	-0.417453	0.666917
P0CW02	Ly6c1	Mus musculus	Lymphocyte antigen 6C1	anchored component of membrane,cell surface,external side of plasma membrane,plasma membrane,synapse	acetylcholine receptor signaling pathway	acetylcholine receptor binding,acetylcholine receptor inhibitor activity	1.5861e-13	2.7621	2.67845	NaN	NaN	NaN	2.72028	NaN	NaN	NaN	2.30695	NaN	2.30695	1.17916	#DIV/0!	0.237766	#DIV/0!
P0DN34	Ndufb1	Mus musculus	NADH dehydrogenase [ubiquinone] 1 beta subcomplex subunit 1	integral component of membrane,mitochondrial respiratory chain complex I,mitochondrion,nuclear speck	mitochondrial respiratory chain complex I assembly	NADH dehydrogenase activity	1.90466e-10	1019.42	1013.55	976.779	1055.71	1216.62	1056.41	1144.49	1298.93	1027.91	764.732	733.031	993.818	1.06299	0.606463	0.0881223	0.217196
P0DN89;P0DN90;P0DN91	Tmem254a;Tmem254b;Tmem254c	Mus musculus	Transmembrane protein 254;Transmembrane protein 254b;Transmembrane protein 254c	integral component of membrane;integral component of membrane;integral component of membrane	;;	;;	9.57123e-07	155.067	182.238	140.729	119.052	80.4475	135.507	76.1845	118.308	112.3	102.77	119.447	105.802	1.28076	0.155249	0.356999	0.808971
[truncated: 5,268 more rows]

## Sheet: Raw data hippocampus
PG.ProteinGroups	PG.Genes	PG.Organisms	PG.ProteinDescriptions	PG.CellularComponent	PG.BiologicalProcess	PG.MolecularFunction	PG.Qvalue	AGE HIPPO-1 Intensity	AGE HIPPO-2 Intensity	AGE HIPPO-3 Intensity	AGE HIPPO-4 Intensity	AGE HIPPO Intensity mean	CONTROL HIPPO-5 Intensity	CONTROL HIPPO-6 Intensity	CONTROL HIPPO-7 Intensity	CONTROL HIPPO-8 Intensity	CONTROL HIPPO-9 Intensity	CONTROL HIPPO Intensity mean	expression ratio	unadj pvalue	LOG2FC	logpvalue
[truncated: 5,826 more rows]

## Sheet: Processed cortex data
PG.ProteinGroups	PG.Genes	PG.Organisms	PG.ProteinDescriptions	PG.CellularComponent	PG.BiologicalProcess	PG.MolecularFunction	PG.Qvalue	expression ratio	unadj pvalue	LOG2FC	logpvalue	Down	Up	Total
[truncated: 90 more rows]

[truncated: 1 more sheets: Processed hippocampus data]
